# Supplementary material for: Effects of size at birth on health, growth and developmental outcomes in children up to age 18: an umbrella review
Source: PubMed Central journal article supplement — Arch Dis Child. 2023 Jun 20;108(12):e324884. doi: 10.1136/archdischild-2022-324884 (PMC11474254; doi:10.1136/archdischild-2022-324884), 2023-06-20
Supplement: archdischild-108-12-s001.pdf [file archdischild-108-12-s001.pdf]

## Supplementary Material

### Contents

|                                                                                                                                      |    |
|--------------------------------------------------------------------------------------------------------------------------------------|----|
| <b>Supplementary material 1-</b> Figure 1. Number of publications on size at birth based on PubMed search .....                      | 2  |
| <b>Supplementary material 2-</b> Full search terms in all the databases.....                                                         | 3  |
| <b>Supplementary material 3-</b> Detailed results by table.....                                                                      | 7  |
| <b>Mortality and hospitalization- Table 1 a</b> .....                                                                                | 12 |
| <b>Neonatal and early childhood ill-health - Table 1 b</b> .....                                                                     | 13 |
| <b>Allergy and lung-related ill-health- Table 1 c</b> .....                                                                          | 15 |
| <b>Chronic ill-health- Table 1 d</b> .....                                                                                           | 17 |
| <b>Behavioural and mental health- Table 1 e</b> .....                                                                                | 24 |
| <b>Nutrition and growth- Table 1 f</b> .....                                                                                         | 27 |
| <b>Developmental (neurodevelopment, motor, cognitive and educational)- Table 1 g</b> .....                                           | 29 |
| <b>Supplementary material 4-</b> Quality of systematic reviews with meta-analyses.....                                               | 34 |
| <b>Supplementary material 5</b> Figure 2- Countries in systematic reviews with metanalyses covering different themes/subthemes. .... | 39 |
| <b>Supplementary material 6</b> —Additional data from two reviews with meta-analyses .....                                           | 48 |
| <b>Supplementary material 7-</b> Prisma checklist 2020 .....                                                                         | 53 |

**Supplementary material 1- Figure 1. Number of publications on size at birth based on PubMed search**

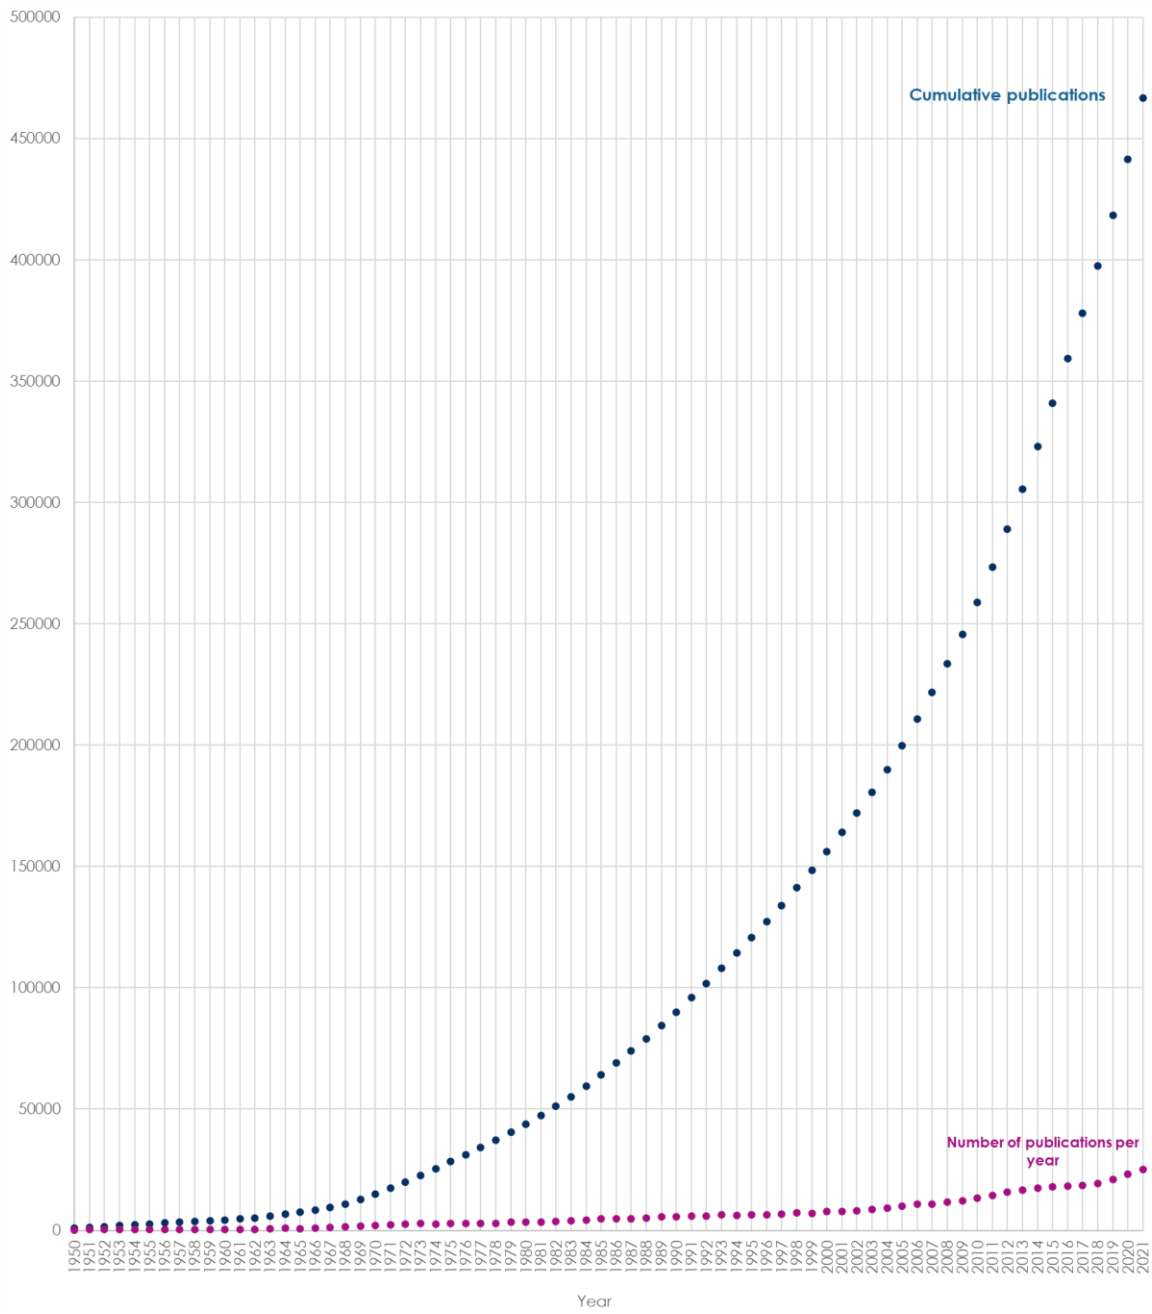

## **Supplementary material 2-a Full search terms in all the databases**

### **MEDLINE**

Ovid MEDLINE(R) ALL <1946 to July 15, 2021>

1 review.pt.

2 (medline or medlars or embase or pubmed or cochrane).tw,sh.

3 (scisearch or psychinfo or psycinfo).tw,sh.

4 (psychlit or psyclit).tw,sh.

5 cinahl.tw,sh.

6 ((hand adj2 search\$) or (manual\$ adj2 search\$)).tw,sh.

7 (electronic database\$ or bibliographic database\$ or computeri?ed database\$ or online database\$).tw,sh.

8 (pooling or pooled or mantel haenszel).tw,sh.

9 (peto or dersimonian or der simonian or fixed effect).tw,sh.

10 (retraction of publication or retracted publication).pt.

11 or/2-10

12 1 and 11

13 meta-analysis.pt.

14 meta-analysis.sh.

15 (meta-analys\$ or meta analys\$ or metaanalys\$).tw,sh.

16 (systematic\$ adj5 review\$).tw,sh.

17 (systematic\$ adj5 overview\$).tw,sh.

18 (quantitativ\$ adj5 review\$).tw,sh.

19 (quantitativ\$ adj5 overview\$).tw,sh.

20 (quantitativ\$ adj5 synthesis\$).tw,sh.

21 (methodologic\$ adj5 review\$).tw,sh.

22 (methodologic\$ adj5 overview\$).tw,sh.

23 (integrative research review\$ or research integration).tw.

24 or/13-23

25 12 or 24

26 (birth-weight\* or birthweight\* or gestation\* age\* or f?etal growth restriction\* or f?etal growth retardation\* or intra-uterine growth restriction\* or intrauterine growth restriction\* or IUGR or prematur\* or pre-matur\* or preterm\* or pre-term\* or catch-up or catchup\* or rapid weight gain).mp.

27 exp infant, low birth weight/ or exp infant, premature/ or exp Birth Weight/ or Fetal Growth Retardation/

28 26 or 27

29 28 and 25

Using <https://bestpractice.bmj.com/info/toolkit/learn-ebm/study-design-search-filters/> for systematic review

### **Embase**

1 exp review/

2 (literature adj3 review\$).ti,ab.

3 exp meta analysis/

4 exp "Systematic Review"/

5 or/1-4

6 (medline or medlars or embase or pubmed or cinahl or amed or psychlit or psyclit or psychinfo or psycinfo or scisearch or cochrane).ti,ab.

7 Retracted Article/

8 6 or 7

9 5 and 8

10 (systematic\$ adj2 (review\$ or overview\$)).ti,ab.

11 (meta?anal\$ or meta anal\$ or meta-anal\$ or metaanal\$ or metanal\$).ti,ab.

12 9 or 10 or 11

13 (birth-weight\* or birthweight\* or gestation\* age\* or fetal growth restriction\* or fetal growth retardation\* or intra-uterine growth restriction\* or intrauterine growth restriction\* or IUGR or prematur\* or pre-matur\* or preterm\* or pre-term\* or catch-up\* or catchup\* or rapid weight gain).mp.

14 exp infant, low birth weight/ or exp infant, premature/ or exp Birth Weight/ or Fetal Growth Retardation/

15 13 or 14

16 12 and 15

#### **ERIC**

(Birthweight or birth weight or gestational age or gestation age or gestational-age or fetal growth restriction or fetal growth retardation or foetal growth restriction or foetal growth retardation or intra-uterine growth restriction or intrauterine growth restriction or IUGR or premature or prematurity or pre-term or preterm or pre-term or catchup or catch-up or catch up or rapid weight gain)

#### **AND**

("meta-analysis" or "meta analysis" or "meta-analyses" or "meta analyses" or "metaanalysis" or "metanalyses" or "systematic review" or "systematic reviews")

Peer review ONLY

**Cochrane Library** searched using MESH and Medline search terms shown above

## **Supplementary material 2 b-Detailed full Methods**

### **Search strategy and eligibility criteria**

We conducted an umbrella review, gathering information from existing systematic reviews and meta-analyses which examined the effects of size-at-birth on health, growth, and developmental outcomes, in children up to 18 years of age.

We systematically searched MEDLINE, Embase, ERIC, and Cochrane Library databases for manuscripts published until 15 July 2021, without restricting on date, language, or location. The search was limited to peer-reviewed systematic reviews or meta-analyses. Key search concepts included (“birthweight” OR “gestational age” OR “intrauterine growth restriction” OR “prematurity”) AND (“systematic review” OR “meta-analysis”). To maximize the eligible reviews, we did not limit the outcomes or the study population. The full search strategy is in supplementary 2. We also hand-searched the reference lists of the eight identified umbrella reviews to ensure we did not miss any reviews.

Citations were imported into EndNote and duplicates removed. Titles and abstracts were screened independently by at least two authors (among NEH, GS, ES) in Rayyan, to identify the studies that met the inclusion/exclusion criteria. All articles identified for full-text screening were assessed for inclusion by at least two authors (ES, NER, VH). Discrepancies were resolved through discussion with a third author (ZJ). We excluded umbrella reviews and systematic reviews of interventions and articles with size-at-birth as an outcome, or which did not have a term, normal birthweight, or appropriate-for-gestational-age comparator, or which included birthweight discordance as an exposure in twins or triplets. Reviews that only showed results for adults (age 18+ years) were excluded, while meta-analyses with children alone or which merged children and adults, were included.

### **Data extraction and analysis**

At least two authors (among ES, VH, GS, NEH, ZJ) independently extracted data on the author, year, location, study design, eligibility criteria, sample size (number of papers reviewed and number of meta-analyses), participants’ age-group, exposures with corresponding definitions, outcomes, and, where available, meta-analyses of the measures of effect. If no measure of effect was included and data were available, we calculate a relative risk as appropriate. We sought consensus for discrepancies by discussing with a third author (ZJ, OC). We assessed overall quality and risk of bias of the constituent systematic reviews using the 12 elements in the Joanna Briggs Institute Critical Appraisal checklists (NER, ES); we did not examine the quality of individual studies within each included systematic review. Publication bias assessment of each meta-analysis was a component of the quality assessment (supplementary material 4 b)

In Tables 1 a-g (detailed in supplementary 3), we mapped the evidence examining size-at-birth risk factors on a wide range of outcomes, in seven themes: (a) mortality and hospitalization (b) neonatal and early childhood acute ill-health (c) allergies and lung-related ill-health (d) chronic ill-health (e) behavioural and mental health (f) growth and nutrition (g) developmental (motor, cognitive and educational). The seven themes had 67 sub-themes. The sub-themes in the behavioural, and mental health theme (theme g) were grouped based on DSM5 classifications<sup>12</sup>. Correlates of size-at-birth measured contemporaneously with birthweight, e.g., head circumference, were not considered to be outcomes. Cost of hospitalization and genetic factors outcomes were not included as they reflected proxies of outcomes included. In Table 2 we did the same as Table 1 for the effects of size-for-gestational-age stratified by gestation.

In Tables 1 a-g meta-analyses of measures of effect were collected for each risk factor and outcome and reported with confidence intervals. The direction of the association was indicated using different colours in Tables 1 a-g– with dark blue denoting a harmful effect, yellow no statistically significant effect, and green, a beneficial effect. The different risk factors examined in Tables a-g are as defined in Box 1; non-standard definitions were indicated by different symbols. A narrative summary of each of the different sub-themes was synthesized, focusing separately on associations between small exposures and continuous/large exposures. Narrative synthesis highlights the magnitude, direction, and consistency of the associations. In Table 3, the results of Tables 1 a-g are summarized with each meta-analysis marked by a symbol indicating the direction of the association.

Age groups studied are shown in Table 1 a-g and Table 2. Occasionally, reviews had sub-themes with only one study and hence no meta-analysis, we did not report effect estimates for these sub-themes.

Country maps were generated using Datawrapper.

We registered our umbrella review (PROSPERO CRD42021268843) and followed PRISMA guidelines (Preferred Reporting Items for Systematic Reviews and Meta-Analyses).

### Supplementary material 3- Detailed results by table.

## **ASSOCIATIONS BETWEEN SIZE-AT-BIRTH AND DIFFERENT OUTCOMES**

### **Mortality and hospitalization- Table 1 a**

Thirty-six meta-analyses (4 reviews)<sup>46-49</sup> measured the association between very preterm, preterm, late preterm, very LBW, LBW, SGA, and mortality. All but three meta-analyses (from one low-quality review where we calculated prevalence ratios<sup>47</sup>) showed those with small size-at birth had higher risks of mortality. Very preterm had the greatest increase in early and late neonatal mortality. HBW was not associated with higher mortality (3/3 meta-analyses)<sup>50,51</sup>. Nearly all reviews assessed mortality risks in children under 5 years – only one included mortality in older children<sup>51</sup>.

Nearly all meta-analyses showed that being early or late preterm (6/7)<sup>52</sup> or HBW (2/2)<sup>49</sup> increased the risk of hospitalization among neonates.

### **Neonatal and early childhood ill-health - Table 1 b**

Most meta-analyses (5/7)<sup>53</sup> showed that SGA and IUGR were not associated with patent ductus arteriosus, while 2/7<sup>53</sup> showed that they decreased the risk. Preterm and LBW neonates had a higher risk of having poor Apgar scores or neonatal asphyxia (2/2)<sup>54</sup>, while one meta-analysis showed that HBW (>4000g) was associated with a higher risk of asphyxia<sup>49</sup>, but no effect when HBW was defined as >4260 g<sup>49</sup>. As physiologically expected, extremely preterm, and other markers of preterm, including extremely LBW and very LBW, were associated with higher risks of retinopathy of prematurity (3/3)<sup>55</sup>, while SGA was not (1/1)<sup>55</sup>. HBW increased the risk of birth trauma, including shoulder dystocia, Erb's palsy and other trauma (6/6)<sup>49</sup>.

LBW and preterm neonates had an increased risk of poor oral health, including more dental carries, opacity, hypoplasia, and molar incisor hypo-mineralisation in nearly all (10/14) meta-analyses (four reviews)<sup>56-59</sup>. Seven reviews (12/12 meta-analyses)<sup>50,52,60-63</sup> all showed that small size-at-birth (very preterm, preterm, late preterm, very LBW, LBW) babies had an increased risk of sepsis and infection, including methicillin-resistant staphylococcus aureus (MRSA) infection, respiratory syncytial virus (RSV) infection, and pneumonia in the first five years of life. The risk of infection at older ages were not studied in meta-analyses. Preterm births had higher risks of epilepsy (3/3) while post-term (1/1) (defined as >41 weeks) did not (1/1)<sup>64</sup>. Extremely LBW, very LBW, preterm (3/3)<sup>65</sup> and increased gestational age per week (3/3)<sup>66</sup> were associated with poorer quality of life, assessed via health utility and sleep duration.

### **Allergy and lung-related ill-health- Table 1 c**

Meta-analyses of small size-at-birth (very preterm, preterm, late term, LBW) neonates showed reduced risks of dermatitis (5/7 meta-analyses; two reviews)<sup>67,68</sup> while continuous measures of birthweight and gestation showed larger and more mature babies had increased risks of dermatitis (2/3)<sup>69</sup>. One review found no relationship between higher birthweight and other allergies (2/3 meta-analyses)<sup>69</sup>.

Most meta-analyses of lung-related diseases (57/68 meta-analyses in 14 reviews)<sup>52,70-80,82,83</sup> showed that very preterm, preterm, very LBW, and LBW neonates had an increased risk of asthma, wheezing, or other measures of poor lung function. Only one meta-analysis examined SGA and asthma and found that SGA was associated with a higher risk<sup>73</sup>. Continuous measures of birthweight and gestational age showed children with higher values had a reduced risk of lung-related disease (13/14 meta-analyses in three reviews)<sup>70,73,74</sup>. Post-term and HBW were not associated with asthma or wheezing (6/7 meta-analysis in four reviews)<sup>77,78,80,81</sup>.

### **Chronic ill-health- Table 1 d**

Chronic ill-health sub-themes included cardiovascular-related outcomes (hypertension, hypercholesterolaemia and measurements of heart related function, chronic heart disease), chronic kidney diseases, diabetes, cancer and metabolic syndrome.

Extremely preterm, extremely LBW, very preterm, very LBW, preterm and LBW babies generally had increased risks of hypertension, including higher systolic or diastolic blood pressure (SBP/DBP) (24/32 meta-analyses in six reviews)<sup>84-88,94</sup>, although 2 metanalyses found IUGR (measured as a combination of fetal growth restriction and SGA) did not. The effects of HBW or LGA on hypertension were mixed, with 6/13 meta-analyses showing increased risk, 2/13 decreased risk, and 5/13 no association (in a total of three reviews)<sup>88,92,93</sup>. In all meta-analyses (7/7)<sup>84</sup> preterm was not associated with total cholesterol, HDL, LDL, triglyceride. The majority of metanalyses showed that for every kg increase in birthweight, cholesterol levels were reduced (9/12 meta-analyses in six reviews)<sup>91,96-100</sup>. Many meta-analyses showed that very preterm, preterm, SGA were associated with an increased risk of coronary heart function indicators (23/36 meta-analyses in two reviews)<sup>101,102</sup>, but none examined the effect of large size-at-birth.

Extremely LBW, very preterm, preterm and LBW children had an increased the risk of kidney-related disease markers (21/25 meta-analyses including 5 with a calculated prevalence ratio in five reviews)<sup>85,87,105-107</sup>. One metaanalysis examined HBW and chronic kidney disease; it showed no effect<sup>106</sup>.

Meta-analyses of the effect of size-at-birth on the development of type 1 diabetes were mixed: 1/5 showed lower risk (LBW) (in one review)<sup>110</sup>, 3/5 no risk (LBW) (in two reviews<sup>109,111</sup>, and 1/5 higher risk (preterm) (in one review)<sup>108</sup>. By contrast, HBW was consistently associated with a higher risk of type 1 diabetes (4/5 meta-analyses in four reviews)<sup>109-112</sup>. LBW (4/4) and HBW (2/3) were both associated with higher risks of developing type 2 diabetes (in two reviews)<sup>113,114</sup>.

Many (178) meta-analyses looked at whether size-at-birth was associated with cancer, including central nervous system tumours, leukaemia, lymphoma, and Wilms' tumour, among others. Among meta-analyses examining preterm, LBW, or SGA (in 13 reviews)<sup>116-122,124,126-130</sup>, most (49/60) found no association. Among metaanalysis of post-term, HBW, LGA, and continuous measurement of birthweight (in 15 reviews)<sup>112,117-120,122-131</sup>, nearly half (50/118) of meta-analyses found an association. Evidence of the association between SGA or LGA and cancer outcomes<sup>112,120,126,129</sup> was mixed.

Meta-analyses of the effect of prematurity or LBW on metabolic syndrome, measured as a combination of chronic diseases outcomes, was also mixed<sup>132</sup>.

### **Behavioural and mental health- Table 1 e**

Very preterm, very LBW, preterm, LBW, and SGA neonates had an increased risk of anxiety and depression disorders in some meta-analyses (7/13 in six reviews)<sup>133-137 138</sup>. This was not observed for other psychological disorders (with 17/22 observing no association in three reviews)<sup>134,135,139</sup>. In some cases, extremely LBW was associated with harmful behavioural outcomes (7/18)<sup>140</sup>, however, this association did not persist for very LBW or preterm neonates (18/21 no association in three reviews)<sup>138,139,141</sup>. IUGR neonates had a higher risk of adverse behavioural outcomes (1/1)<sup>142</sup>. Extremely preterm, very LBW, LBW and preterm had higher risks of low attention scores (13/14 meta-analyses in five reviews)<sup>138,139,146-148</sup>, ADHD (25/32 meta-analyses in six review))<sup>140-142,149-151</sup>, and autism (4/4 meta-analyses in three reviews)<sup>140,152,153</sup>. Two of the latter reviews examined IUGR and SGA as risk factors and showed no association for ADHD (1/1)<sup>142</sup> but an increased risk for autism (1/1)<sup>153</sup>. The association between preterm, LBW and SGA, and the risk of suicide and suicide attempt was inconsistent (3/5)<sup>154</sup>. Preterm and LBW were associated with lower physical activity among early childhood and older age populations (including adults) (2/2 in two reviews)<sup>143,144</sup>. Large size-at-birth/post term was rarely examined as a risk factor for either behavioural or developmental themes.



### **Nutrition and growth- Table 1 f**

Sixty-two meta-analyses (13 reviews) examined the effect of size-at-birth on body composition, namely height, weight, head circumference, body fat, body water, bone mineralization, body mass index (BMI), overweight and underweight<sup>77,84,85,91,155-157,159-163 158</sup>. The association between size-at-birth and BMI was mixed, with some meta-analyses showing small size increased the risk of high BMI among children aged under 10 years old (4/10), while others showed no effect among children aged 10-19 years (6/10) in two reviews<sup>77,84</sup>. Small size-at-birth (LBW, preterm and SGA) was consistently associated with higher risk of childhood stunting, wasting, and underweight (9/9)<sup>160</sup>. Evidence on the association between small size-at-birth and overweight/obesity was also mixed, with (2/7) meta-analyses showing no effect (in three reviews), (1/7) increased, and (4/7) decreased effect in three reviews<sup>156,161,162</sup>. LBW was associated with a decreased risk of obesity in children below age 13 years, but not in older children.

In 6 meta-analyses (two reviews), HBW babies had nearly twice the long-term risk of becoming overweight compared to normal birthweight children, irrespective of the age at assessment<sup>161,162</sup>. No meta-analyses examined this association for LGA.

### **Developmental (neurodevelopment, motor, cognitive and educational)- Table 1 g**

Infants born with a small size-at-birth were at increased risk of neurological impairment, and thus of motor and cognitive developmental delays. Evidence on the association between small size-at-birth and brain structure was very consistent; all 26 meta-analyses (4 reviews) indicated that very LBW, very preterm and preterm were more likely to have brain-structure abnormalities, specifically smaller brain volume, reduced cerebral cortex surface area, regional cortical thinning, and brain white-matter injury<sup>164-167</sup>.

The association between size-at-birth, specifically very LBW, very preterm and preterm, and poor visuomotor outcomes, was mixed in three reviews<sup>146,147,168</sup>, with some meta-analyses showing no effect (3/11) or decreased visuomotor outcomes (7/11), and one meta-analysis showing preterm births had better visuomotor outcomes in neonates (1/11), though the same review showed no improvement in infants.

Small size-at-birth risk factors (extremely preterm, very preterm, preterm, late term extremely LBW, LBW, SGA) were associated with an increased risk of cerebral palsy (13/14 meta-analyses including 9 with calculated prevalence ratio in four reviews)<sup>170-173</sup>, with increasing gestational age being associated with a decreasing cerebral palsy risk (1/1)<sup>170</sup>. Thirty-three meta-analyses (eight reviews)<sup>139,141,174-179</sup>, compared small-sized at birth (very LBW, very preterm, preterm, LBW, SGA) to normal birthweight neonates, and showed small-sized babies had increased motor impairment and developmental coordination disorders and decreased muscle strength (27/33). SGA was not associated with motor development (2/2)<sup>174</sup>.

Meta-analyses also indicated that poor neurodevelopment led to cognitive deficits that persisted into adolescence and early adulthood. Small size-at-birth (extremely preterm, very preterm, preterm, extremely LBW, very LBW, LBW, SGA) was consistently associated with an increased risk of intellectual disability including of lower cognitive scores, processing speed, mental function, and shifting (cognitive flexibility), planning, and executive functions (32/38 meta-analyses in 13 reviews)<sup>138,139,141,146,148,151,174,177,179,181-184</sup>, and of reduced working memory (5/5 meta-analyses in four reviews)<sup>138,141,146,182</sup>. Small size-at-birth babies (extremely preterm, extremely LBW, very preterm, very LBW, preterm, late term, LBW) had lower intelligence quotient (IQ) scores than normal size babies (42/44 meta-analyses in ten reviews)<sup>141,146,177,181,183,185-189</sup>; we noted that the association persisted among SGA and IUGR babies (3/4 meta-analyses in two reviews)<sup>142,188</sup>. However, continuous exposures of gestation age or birthweight did not appear to have an effect in 6/8 meta-analyses (with no effect) in two reviews<sup>142 188</sup>. Small size-at-birth babies (extremely preterm, very preterm, very LBW, preterm, LBW, SGA) had lower language development (19/27 meta-analysis in seven reviews)<sup>138,148,174,183,190-192</sup>, reading performance (decoding, word identification, comprehension) (25/28 meta-analyses in seven reviews)<sup>138,141,184,190,191,193,194</sup>, and applied

mathematics school performance (knowledge, calculation, fluency, applied problem solving) (15/16 meta-analyses in five reviews) <sup>138,141,173,184,193</sup> compared to other babies.

#### **UNDERSTANDING THE RELATIVE EFFECTS OF MATURITY (PRETERM) AND IUGR (SMALL FOR GESTATIONAL AGE) COMBINATIONS- Table 2**

Only 11 reviews, and 73 meta-analyses within these, compared risks by size-for-gestational-age stratified by gestation (Table 2). Four reviews<sup>46,48,160,174</sup> (37 meta-analyses) compared term-SGA, preterm- SGA, and preterm-AGA to term-AGA babies. These ideal comparisons elucidated the relative magnitude of the effect of SGA matching on preterm/term status, and the relative magnitude of the effect of gestational age, matching on AGA status. For example, we see that when compared to term-AGA, the preterm-SGA group had the highest risk of neonatal mortality, RR=15.4, followed by preterm-AGA, RR=8.1, and term-SGA, RR=2.4 <sup>46</sup>. This pattern was also observed for cognitive outcomes (Table 2). By contrast for undernutrition (wasting, stunting), the preterm-SGA group had the highest increased risk. For example, when compared to term-AGA, the preterm-SGA risk for stunting was aOR=4.5, followed by term-SGA, aOR=2.4, and preterm-AGA aOR=1.9 (Table 2)<sup>160</sup>. The remaining seven studies (36 meta-analyses) either compared preterm-SGA, preterm-AGA to term-AGA only, or term-SGA to term-AGA or looked at term LBW compared to term normal body weight <sup>42-45,84,87,172</sup>. Table 2 also shows that binarizing gestational age may mask a u-shaped variation in risk and join a higher risk group (HBW) with a lower risk one (normal birthweight), inflating risk in the comparator. For example, very preterm (<34 weeks)-SGA neonates had very high mortality risks (OR=57.0) when compared to term-AGA, while for 34-36 week preterm-SGA births, the risks were lower (OR=19.9)<sup>48</sup>.

| EXPOSURES             |                            | SYMBOLS in EXPOSURES |                        | OUTCOMES                                                                          |                                                                       | ABBREVIATIONS        |                                                                            |
|-----------------------|----------------------------|----------------------|------------------------|-----------------------------------------------------------------------------------|-----------------------------------------------------------------------|----------------------|----------------------------------------------------------------------------|
| EPT(<28wks)           | Extremely preterm          | X                    | As defined in exposure |  | Harmful effect                                                        | ABPM                 | Ambulatory Blood Pressure Monitoring                                       |
| ELBW(<1000g)          | Extremely low birthweight  |                      |                        |  | No effect                                                             | ADHD                 | Attention Deficit Hyperactivity Disorder                                   |
| VPT(<32wks)           | Very preterm               |                      |                        |  | Beneficial effect                                                     | AGTE                 | Ankara-Gelisim-Tarama-Envanteri (Ankara Developmental Screening Inventory) |
| VLBW(<1500g)          | Very low birthweight       | 26                   | GA<26 wks              | <i></i>                                                                           | Calculation/post review publication                                   | APGAR                | Appearance, Pulse, Grimace, Activity and Respiration                       |
| PT (<37wks)           | Preterm                    | v                    | GA- 28/29-31/32 wks    |                                                                                   |                                                                       | ASQ                  | Ages and Stages Questionnaire                                              |
| LBW(<2500g)           | Low birthweight            | ^                    | GA<34 wks              |                                                                                   |                                                                       | BMI                  | Body Mass Index                                                            |
| SGA(<10th percentile) | Small for gestational age  | LLT                  | GA- 32-36 wks          | aβ                                                                                | Adjusted β Correlation                                                | BOTMP                | Bruininks-Oseretsky Test of Motor Proficiency                              |
| BW (cont.)            | Birthweight continuous     | LT                   | GA- 34/33 - 36 wks     | aHR                                                                               | Adjusted Hazard Ratio                                                 | BPD                  | Bronchopulmonary dysplasia                                                 |
| GA (cont.)            | Gestational age continuous | ET                   | GA- 37-38 wks          | aOR                                                                               | Adjusted Odds Ratio                                                   | BSID                 | Bayley Scales of Infant Development                                        |
| Post Term(>42 wks)    | Post term                  | 41                   | GA≥41 wks              | aRR                                                                               | Adjusted Relative Risk                                                | CELF                 | Clinical Evaluation of Language Fundamentals                               |
| HBW(>4000g)           | High birthweight           |                      |                        | aSMD                                                                              | Adjusted Standardized Mean Difference                                 | CLD                  | Chronic Lung Disease                                                       |
| LGA(>90th percentile) | Large for gestational age  |                      |                        | HR                                                                                | Hazard Ratio                                                          | CNS                  | Central Nervous System                                                     |
|                       |                            |                      |                        | MD                                                                                | Mean Difference                                                       | d                    | Day                                                                        |
|                       |                            |                      |                        | OR                                                                                | Odds Ratio                                                            | DLCO                 | Diffusion Capacity of the Lung for Carbon Monoxide                         |
|                       |                            |                      |                        | RR                                                                                | Relative Risk                                                         | EBP                  | Externalizing Behavioural Problems                                         |
|                       |                            |                      |                        | SD                                                                                | Standard Deviation                                                    | eGFR                 | Estimated Glomerular Filtration Rate                                       |
|                       |                            |                      |                        | SMD                                                                               | Standardized Mean Difference                                          | ESRD                 | End-Stage Renal Disease                                                    |
|                       |                            |                      |                        | SMD                                                                               | Standardized Mean Difference for Heteroscedastic Population Variances | FEF <sub>25-75</sub> | Forced Expiratory Flow between 25%-75% of Forced Vital Capacity            |
|                       |                            |                      |                        | WMD                                                                               | Weighted Mean Difference                                              | FEF <sub>75</sub>    | Forced Expiratory Flow at 75% of Forced Vital Capacity                     |
|                       |                            |                      |                        |                                                                                   |                                                                       | FeNO                 | Fractional Exhaled Nitric Oxide                                            |
|                       |                            |                      |                        |                                                                                   |                                                                       | FEV <sub>1</sub>     | Forced Expiratory Volume in 1 second                                       |
|                       |                            |                      |                        |                                                                                   |                                                                       | FGR                  | Fetal Growth Retardation                                                   |
|                       |                            |                      |                        |                                                                                   |                                                                       | FTFQ                 | Five to Fifteen Questionnaire                                              |
|                       |                            |                      |                        |                                                                                   |                                                                       | FVC                  | Forced Vital Capacity                                                      |
|                       |                            |                      |                        |                                                                                   |                                                                       | GDS-II               | Griffiths Developmental Scales Second Edition Motor Subscale               |
|                       |                            |                      |                        |                                                                                   |                                                                       | GFR                  | Glomerular Filtration Rate                                                 |
|                       |                            |                      |                        |                                                                                   |                                                                       | h                    | Hour                                                                       |
|                       |                            |                      |                        |                                                                                   |                                                                       | HDL                  | High Density Lipoprotein                                                   |
|                       |                            |                      |                        |                                                                                   |                                                                       | HOMA-IR              | Homeostasis Model Assessment of Insulin Resistance                         |
|                       |                            |                      |                        |                                                                                   |                                                                       | HSCS                 | Health Status Classification System                                        |
|                       |                            |                      |                        |                                                                                   |                                                                       | hsPDA                | Hemodynamically Significant Patent Ductus Arteriosus                       |
|                       |                            |                      |                        |                                                                                   |                                                                       | HSU                  | Health Service Use                                                         |
|                       |                            |                      |                        |                                                                                   |                                                                       | HUI2/HUI3            | Health Utilities Index Mark 2, HUI3 Health Utilities Index Mark 3          |
|                       |                            |                      |                        |                                                                                   |                                                                       | IU                   | International Units                                                        |
|                       |                            |                      |                        |                                                                                   |                                                                       | JLO                  | Judgment of Line Orientation                                               |
|                       |                            |                      |                        |                                                                                   |                                                                       | K-ABC                | Kaufman Assessment Battery for Children                                    |
|                       |                            |                      |                        |                                                                                   |                                                                       | KTK                  | Körperkoordinationstest Für Kinder                                         |
|                       |                            |                      |                        |                                                                                   |                                                                       | LDL                  | Low Density Lipoprotein                                                    |
|                       |                            |                      |                        |                                                                                   |                                                                       | m                    | Month                                                                      |
|                       |                            |                      |                        |                                                                                   |                                                                       | MABC                 | Movement Assessment Battery for Children                                   |
|                       |                            |                      |                        |                                                                                   |                                                                       | MEF <sub>50</sub>    | Maximum Expiratory Flow at 50% of Forced Vital Capacity                    |
|                       |                            |                      |                        |                                                                                   |                                                                       | min                  | Minutes                                                                    |
|                       |                            |                      |                        |                                                                                   |                                                                       | mmHg                 | Millimeters of Mercury                                                     |
|                       |                            |                      |                        |                                                                                   |                                                                       | MRSA                 | Methicillin-Resistant Staphylococcus Aureus                                |
|                       |                            |                      |                        |                                                                                   |                                                                       | ms                   | Millisecond                                                                |
|                       |                            |                      |                        |                                                                                   |                                                                       | MSCA                 | McCarthy Scales of Children's Ability                                      |
|                       |                            |                      |                        |                                                                                   |                                                                       | MVPT                 | Motor-Free Visual Perception Test Revised                                  |
|                       |                            |                      |                        |                                                                                   |                                                                       | NEPSY                | Developmental NeuroPSYchological Assessment                                |
|                       |                            |                      |                        |                                                                                   |                                                                       | NICU                 | Neonatal Intensive Care Unit                                               |
|                       |                            |                      |                        |                                                                                   |                                                                       | OGTT                 | Oral Glucose Tolerance Test                                                |
|                       |                            |                      |                        |                                                                                   |                                                                       | pc                   | Percentile                                                                 |
|                       |                            |                      |                        |                                                                                   |                                                                       | PDA                  | Patent Ductus Arteriosus                                                   |
|                       |                            |                      |                        |                                                                                   |                                                                       | PDMS                 | Peabody Developmental Motor Scales                                         |
|                       |                            |                      |                        |                                                                                   |                                                                       | PEDI                 | Paediatric Evaluation of Disability Inventory                              |
|                       |                            |                      |                        |                                                                                   |                                                                       | RSV                  | Respiratory Syncytial Virus                                                |
|                       |                            |                      |                        |                                                                                   |                                                                       | SDM                  | Seed-based d Mapping                                                       |
|                       |                            |                      |                        |                                                                                   |                                                                       | Touwen               | Touwen Neurological Examination                                            |
|                       |                            |                      |                        |                                                                                   |                                                                       | TVPS-R               | Test of Visual Perceptual Skills Revised                                   |
|                       |                            |                      |                        |                                                                                   |                                                                       | VMI                  | Beery-Buktenica Developmental Test of Visual Motor Integration             |
|                       |                            |                      |                        |                                                                                   |                                                                       | VO <sub>2</sub>      | Volume of oxygen                                                           |
|                       |                            |                      |                        |                                                                                   |                                                                       | Wee-FIM              | Functional Independence Measure for Children                               |
|                       |                            |                      |                        |                                                                                   |                                                                       | wks                  | Weeks                                                                      |
|                       |                            |                      |                        |                                                                                   |                                                                       | y                    | Year                                                                       |

Table 1 a- Associations between size-at-birth and mortality and hospitalization outcomes

| Ref                    | Exposures (size at birth) |               |              |               |             |              |                        |            |            |                     | Population | Outcomes | Effect size<br>[confidence interval],<br>direction of association |                                       |
|------------------------|---------------------------|---------------|--------------|---------------|-------------|--------------|------------------------|------------|------------|---------------------|------------|----------|-------------------------------------------------------------------|---------------------------------------|
|                        | Small                     |               |              |               |             | Cont         | Large                  |            |            |                     |            |          |                                                                   |                                       |
|                        | EPT (<28wks)              | ELBW (<1000g) | VPT (<32wks) | VLBW (<1500g) | PT (<37wks) | LBW (<2500g) | SGA (<10th percentile) | BW (cont.) | GA (cont.) | Post Term (>42 wks) |            |          |                                                                   | HBW (>4000g)                          |
| <b>Mortality</b>       |                           |               |              |               |             |              |                        |            |            |                     |            |          |                                                                   |                                       |
| 46                     |                           | X             |              |               |             |              |                        |            |            |                     |            | <7d      | Early Neonatal Mortality                                          | RR= 34.77 [18.10, 66.79]              |
| 46                     |                           |               |              | X             |             |              |                        |            |            |                     |            | <7d      | Early Neonatal Mortality                                          | RR= 7.07 [3.50, 14.28]                |
| 46                     |                           |               |              | LT            |             |              |                        |            |            |                     |            | <7d      | Early Neonatal Mortality                                          | RR= 2.86 [1.75, 4.67]                 |
| 46                     |                           |               |              |               |             |              |                        |            |            |                     | X          | <7d      | Early Neonatal Mortality                                          | RR= 1.98 [1.45, 2.70]                 |
| 46                     |                           |               |              |               |             |              |                        |            |            |                     | P3         | <7d      | Early Neonatal Mortality                                          | RR= 2.81 [1.93, 4.11]                 |
| 46                     |                           | X             |              |               |             |              |                        |            |            |                     |            | 8-28d    | Late Neonatal Mortality                                           | RR= 24.68 [12.60, 48.36]              |
| 46                     |                           |               |              | X             |             |              |                        |            |            |                     |            | 8-28d    | Late Neonatal Mortality                                           | RR= 5.53 [3.01, 10.17]                |
| 46                     |                           |               |              | LT            |             |              |                        |            |            |                     |            | 8-28d    | Late Neonatal Mortality                                           | RR= 3.38 [2.37, 4.82]                 |
| 46                     |                           |               |              |               |             |              |                        |            |            |                     | X          | 8-28d    | Late Neonatal Mortality                                           | RR= 2.08 [1.41, 3.06]                 |
| 46                     |                           |               |              |               |             |              |                        |            |            |                     | P3         | 8-28d    | Late Neonatal Mortality                                           | RR= 2.84 [1.84, 4.38]                 |
| 47                     | X                         |               |              |               |             |              |                        |            |            |                     |            | Neonates | Neonatal Mortality                                                | Prevalence ratio= 0.25                |
| 47                     |                           | X             |              |               |             |              |                        |            |            |                     |            | Neonates | Neonatal Mortality                                                | Prevalence ratio= 0.5                 |
| 47                     |                           |               | v            |               |             |              |                        |            |            |                     |            | Neonates | Neonatal Mortality                                                | Prevalence ratio= 1.5                 |
| 46                     |                           |               | X            |               |             |              |                        |            |            |                     |            | <28d     | Neonatal Mortality                                                | RR= 28.82 [15.51, 53.56]              |
| 48                     |                           |               | ^            |               |             |              |                        |            |            |                     |            | ≤28d     | Neonatal Mortality                                                | OR= 58.74 [28.41, 121.45]             |
| 47                     |                           |               |              | o             |             |              |                        |            |            |                     |            | Neonates | Neonatal Mortality                                                | Prevalence ratio= 1.5                 |
| 46                     |                           |               |              |               | X           |              |                        |            |            |                     |            | <28d     | Neonatal Mortality                                                | RR= 6.82 [3.56, 13.07]                |
| 47                     |                           |               |              |               | LT          |              |                        |            |            |                     |            | Neonates | Neonatal Mortality                                                | Prevalence ratio= 0.75                |
| 48                     |                           |               |              |               | LT          |              |                        |            |            |                     |            | ≤28d     | Neonatal Mortality                                                | OR= 6.25 [3.03, 12.87]                |
| 46                     |                           |               |              |               | LT          |              |                        |            |            |                     |            | <28d     | Neonatal Mortality                                                | RR= 3.05 [2.02, 4.60]                 |
| 47                     |                           |               |              |               |             | X            |                        |            |            |                     |            | Neonates | Neonatal Mortality                                                | Prevalence ratio= 1.5                 |
| 48                     |                           |               |              |               |             | X            |                        |            |            |                     |            | ≤28d     | Neonatal Mortality                                                | OR= 7.64 [4.8, 12.15]                 |
| 46                     |                           |               |              |               |             |              |                        |            |            |                     | P3         | <28d     | Neonatal Mortality                                                | RR= 2.41 [1.66, 3.50]                 |
| 46                     |                           |               |              |               |             |              |                        |            |            |                     | X          | <28d     | Neonatal Mortality                                                | RR= 1.83 [1.34, 2.50]                 |
| 48                     |                           |               |              |               |             |              |                        |            |            |                     | X          | ≤28d     | Neonatal Mortality                                                | OR= 2.14 [1.33, 3.45]                 |
| 47                     |                           |               |              |               |             |              |                        |            | X          |                     |            | Neonates | Neonatal Mortality                                                | Prevalence ratio= 0.25                |
| 49                     |                           |               |              |               |             |              |                        |            |            |                     | X          | Neonates | Perinatal Death                                                   | OR= 1.77 [0.30, 10.34]                |
| 49                     |                           |               |              |               |             |              |                        |            |            |                     | ~          | Neonates | Perinatal Death                                                   | OR= 0.73 [0.28, 1.90]                 |
| 46                     |                           | X             |              |               |             |              |                        |            |            |                     |            | 29-365d  | Post Neonatal Mortality                                           | RR= 5.71 [2.70, 12.06]                |
| 46                     |                           |               |              | X             |             |              |                        |            |            |                     |            | 29-365d  | Post Neonatal Mortality                                           | RR= 2.50 [1.48, 4.22]                 |
| 46                     |                           |               |              | LT            |             |              |                        |            |            |                     |            | 29-365d  | Post Neonatal Mortality                                           | RR= 2.28 [1.62, 3.19]                 |
| 46                     |                           |               |              |               |             |              |                        |            |            |                     | X          | 29-365d  | Post Neonatal Mortality                                           | RR= 1.90 [1.32, 2.73]                 |
| 46                     |                           |               |              |               |             |              |                        |            |            |                     | P3         | 29-365d  | Post Neonatal Mortality                                           | RR= 2.15 [1.48, 4.22]                 |
| 46                     |                           | X             |              |               |             |              |                        |            |            |                     |            | <365d    | Infant Mortality                                                  | RR= 18.42 [8.93, 38.01]               |
| 46                     |                           |               |              | X             |             |              |                        |            |            |                     |            | <365d    | Infant Mortality                                                  | RR= 4.65 [2.32, 9.33]                 |
| 46                     |                           |               |              | LT            |             |              |                        |            |            |                     |            | <365d    | Infant Mortality                                                  | RR= 2.49 [1.64, 3.78]                 |
| 46                     |                           |               |              |               |             |              |                        |            |            |                     | X          | <365d    | Infant Mortality                                                  | RR= 1.85 [1.28, 2.67]                 |
| 46                     |                           |               |              |               |             |              |                        |            |            |                     | P3         | <365d    | Infant Mortality                                                  | RR= 2.44 [1.53, 3.89]                 |
| 50                     |                           |               |              | X             |             |              |                        |            |            |                     |            | <5y      | Mortality                                                         | OR= 3.81 [1.68, 8.63]                 |
| 51                     |                           |               |              |               |             |              |                        |            | X          |                     |            | 13-100y  | All-cause Mortality                                               | HR= 0.94 [0.92, 0.97] per kg increase |
| 51                     |                           |               |              |               |             |              |                        |            |            | o                   |            | 13-100y  | All-cause Mortality                                               | HR= 1.02 [0.99, 1.05]                 |
| <b>Hospitalization</b> |                           |               |              |               |             |              |                        |            |            |                     |            |          |                                                                   |                                       |
| 52                     |                           |               |              | LT            |             |              |                        |            |            |                     |            | <14d     | Jaundice/Hyperbilirubinemia Admission                             | OR= 3.87 [2.63, 5.69]                 |
| 52                     |                           |               |              | LT            |             |              |                        |            |            |                     |            | <28d     | Nonjaundice Admission                                             | OR= 1.35 [0.84, 2.18]                 |
| 52                     |                           |               |              | LT            |             |              |                        |            |            |                     |            | ≤1m      | All-cause Health Service Use (HSU)                                | OR= 2.24 [1.17, 4.30]                 |
| 52                     |                           |               |              | LT            |             |              |                        |            |            |                     |            | ≤1y      | All-cause Health Service Use (HSU)                                | OR= 1.73 [1.44, 2.07]                 |
| 52                     |                           |               |              | LT            |             |              |                        |            |            |                     |            | 1-6y     | All-cause Health Service Use (HSU)                                | OR= 1.37 [1.28, 1.47]                 |
| 52                     |                           |               |              | ET            |             |              |                        |            |            |                     |            | <28d     | All-cause Health Service Use (HSU)                                | OR= 2.13 [1.90, 2.40]                 |
| 52                     |                           |               |              | ET            |             |              |                        |            |            |                     |            | ≤1y      | All-cause Health Service Use (HSU)                                | OR= 1.12 [1.02, 1.23]                 |
| 49                     |                           |               |              |               |             |              |                        |            |            |                     | X          | Neonates | Neonatal Intensive Care Unit (NICU) Admission                     | OR= 1.79 [1.41, 2.26]                 |
| 49                     |                           |               |              |               |             |              |                        |            |            |                     | ~          | Neonates | Neonatal Intensive Care Unit (NICU) Admission                     | OR= 2.02 [1.54, 2.63]                 |

Table 1 b- Associations between size-at-birth and neonatal and early childhood ill-health outcomes

| Ref                                | Exposures (size at birth) |               |              |               |             |              |                        |            | Population | Outcomes    | Effect size<br>[confidence interval],<br>direction of association |                         |
|------------------------------------|---------------------------|---------------|--------------|---------------|-------------|--------------|------------------------|------------|------------|-------------|-------------------------------------------------------------------|-------------------------|
|                                    | Small                     |               |              |               |             |              | Cont                   | Large      |            |             |                                                                   |                         |
|                                    | EPT (<28wks)              | ELBW (<1000g) | VPT (<32wks) | VLBW (<1500g) | PT (<37wks) | LBW (<2500g) | SGA (<10th percentile) | BW (cont.) |            |             |                                                                   | GA (cont.)              |
| <b>Primarily neonatal outcomes</b> |                           |               |              |               |             |              |                        |            |            |             |                                                                   |                         |
| <b>Congenital defects</b>          |                           |               |              |               |             |              |                        |            |            |             |                                                                   |                         |
| 53                                 |                           |               |              |               |             |              | XI                     |            |            | <10d        | Patent Ductus Arteriosus (PDA)                                    | OR= 0.82 [0.70, 0.96]   |
| 53                                 |                           |               |              |               |             |              | X                      |            |            | <10d        | Patent Ductus Arteriosus (PDA)                                    | OR= 0.81 [0.66, 0.98]   |
| 53                                 |                           |               |              |               |             |              | P5                     |            |            | <10d        | Patent Ductus Arteriosus (PDA)                                    | OR= 0.63 [0.26, 1.52]   |
| 53                                 |                           |               |              |               |             |              | P3                     |            |            | <10d        | Patent Ductus Arteriosus (PDA)                                    | OR= 1.09 [0.70, 1.71]   |
| 53                                 |                           |               |              |               |             |              | XI                     |            |            | <10d        | Hemodynamically Significant PDA and PDA Treatment                 | OR= 0.87 [0.72, 1.04]   |
| 53                                 |                           |               |              |               |             |              | XI                     |            |            | <10d        | Hemodynamically Significant PDA                                   | OR= 0.92 [0.71, 1.20]   |
| 53                                 |                           |               |              |               |             |              | XI                     |            |            | <10d        | PDA Requiring Treatment                                           | OR= 0.82 [0.64, 1.06]   |
| <b>Asphyxia</b>                    |                           |               |              |               |             |              |                        |            |            |             |                                                                   |                         |
| 54                                 |                           |               | X            |               |             |              |                        |            |            | 1-5min life | Low APGAR Score, Neonatal Asphyxia                                | aOR= 3.98 [3.00, 5.29]  |
| 54                                 |                           |               |              | X             |             |              |                        |            |            | 1-5min life | Low APGAR Score, Neonatal Asphyxia                                | aOR= 5.17 [2.62, 10.22] |
| 49                                 |                           |               |              |               |             |              |                        |            | X          | Neonates    | Neonatal Asphyxia                                                 | OR= 2.88 [1.34, 6.22]   |
| 49                                 |                           |               |              |               |             |              |                        |            | ~          | Neonates    | Neonatal Asphyxia                                                 | OR= 2.45 [0.24, 25.59]  |
| <b>Retinopathy</b>                 |                           |               |              |               |             |              |                        |            |            |             |                                                                   |                         |
| 55                                 | X                         |               |              |               |             |              |                        |            |            | <28d        | Retinopathy of Prematurity                                        | OR= 6.26 [4.86, 8.06]   |
| 55                                 |                           | X             |              |               |             |              |                        |            |            | <28d        | Retinopathy of Prematurity                                        | OR= 5.8 [4.8, 6.8]      |
| 55                                 |                           |               | X            |               |             |              |                        |            |            | <28d        | Retinopathy of Prematurity                                        | OR= 4.81 [3.77, 6.13]   |
| 55                                 |                           |               |              |               |             | X            |                        |            |            | <28d        | Retinopathy of Prematurity                                        | OR= 1.2 [0.9, 1.80]     |
| <b>Birth Traumas</b>               |                           |               |              |               |             |              |                        |            |            |             |                                                                   |                         |
| 49                                 |                           |               |              |               |             |              |                        |            | X          | Neonates    | Shoulder Dystocia                                                 | OR= 7.18 [2.06, 25.00]  |
| 49                                 |                           |               |              |               |             |              |                        |            | ~          | Neonates    | Shoulder Dystocia                                                 | OR= 7.33 [5.13, 10.48]  |
| 49                                 |                           |               |              |               |             |              |                        |            | ---        | Neonates    | Shoulder Dystocia                                                 | OR= 16.16 [7.62, 34.26] |
| 49                                 |                           |               |              |               |             |              |                        |            | X          | Neonates    | Other Birth Trauma                                                | OR= 2.99 [1.28, 7.02]   |
| 49                                 |                           |               |              |               |             |              |                        |            | ~          | Neonates    | Other Birth Trauma                                                | OR= 25.69 [3.26, 32.13] |
| 49                                 |                           |               |              |               |             |              |                        |            | X          | Neonates    | Erb's Palsy                                                       | OR= 3.45 [1.56, 7.61]   |
| <b>Primarily children outcomes</b> |                           |               |              |               |             |              |                        |            |            |             |                                                                   |                         |
| <b>Caries/Oral Health</b>          |                           |               |              |               |             |              |                        |            |            |             |                                                                   |                         |
| 56                                 |                           |               | X            |               |             |              |                        |            |            | 2-72m       | Dental Caries                                                     | Prevalence Ratio= 1.30  |
| 57                                 |                           |               | X            |               |             |              |                        |            |            | 1-6y        | Dental Caries                                                     | OR= 1.59 [1.36, 1.87]   |
| 57                                 |                           |               | X            |               |             |              |                        |            |            | ≤3y         | Dental Caries                                                     | OR= 0.90 [0.59, 1.37]   |
| 56                                 |                           |               |              | X             |             |              |                        |            |            | 2-72m       | Dental Caries                                                     | Prevalence Ratio= 1.21  |
| 57                                 |                           |               |              | X             |             |              |                        |            |            | ≤3y         | Dental Caries                                                     | OR= 0.78 [0.24, 2.51]   |
| 57                                 |                           |               |              | X             |             |              |                        |            |            | 6m-6y       | Dental Caries                                                     | OR= 1.12 [0.94, 1.33]   |
| 58                                 |                           |               | X            |               |             |              |                        |            |            | 9-10y       | Molar Incisor Hypomineralisation                                  | OR= 1.57 [1.07, 2.31]   |
| 59                                 |                           |               | X            |               |             |              |                        |            |            | 72-336m     | Molar Incisor Hypomineralisation                                  | OR= 1.65 [1.14, 2.38]   |
| 58                                 |                           |               |              | X             |             |              |                        |            |            | 8.4-12y     | Molar Incisor Hypomineralisation                                  | OR= 3.25 [2.28, 4.62]   |
| 59                                 |                           |               | X            |               |             |              |                        |            |            | 9-156m      | Enamel Hypoplasia                                                 | OR= 6.63 [3.61, 12.18]  |
| 59                                 |                           |               | X            |               |             |              |                        |            |            | 9-156m      | Enamel Opacity                                                    | OR= 1.98 [1.21, 3.25]   |
| 59                                 |                           |               | X            |               |             |              |                        |            |            | 9-156m      | Developmental Defects of Enamel                                   | OR= 3.27 [2.02, 5.30]   |
| 59                                 |                           |               | X            |               |             |              |                        |            |            | 9-156m      | Developmental Defects of Enamel Primary Dentition                 | OR= 4.07 [2.49, 6.65]   |
| 59                                 |                           |               | X            |               |             |              |                        |            |            | 9-156m      | Developmental Defects of Enamel Permanent Dentition               | OR= 1.57 [0.88, 2.77]   |
| <b>Infection/Sepsis</b>            |                           |               |              |               |             |              |                        |            |            |             |                                                                   |                         |
| 60                                 |                           |               | X            |               |             |              |                        |            |            | <28d        | Neonatal Sepsis                                                   | OR= 3.36 [2.50, 4.54]   |
| 60                                 |                           |               |              | X             |             |              |                        |            |            | <28d        | Neonatal Sepsis                                                   | OR= 1.42 [1.07, 1.88]   |
| 61                                 |                           | X             |              |               |             |              |                        |            |            | Neonates    | Methicillin-Resistant Staphylococcus Aureus (MRSA) Infection      | OR= 2.67 [1.35, 5.27]   |
| 61                                 |                           |               | X            |               |             |              |                        |            |            | Neonates    | Methicillin-Resistant Staphylococcus Aureus (MRSA) Infection      | OR= 2.63 [1.25, 5.55]   |
| 62                                 |                           | X             |              |               |             |              |                        |            |            | 0-5y        | Respiratory Syncytial Virus Acute Lower Respiratory Infection     | OR= 2.79 [2.19, 3.55]   |
| 50                                 |                           | X             |              |               |             |              |                        |            |            | <5y         | Respiratory Syncytial Virus Acute Lower Respiratory Infection     | OR= 5.90 [3.35, 14.83]  |
| 50                                 |                           |               | X            |               |             |              |                        |            |            | <5y         | Respiratory Syncytial Virus Acute Lower Respiratory Infection     | OR= 2.73 [1.92, 3.87]   |
| 62                                 |                           |               | X            |               |             |              |                        |            |            | 0-5y        | Respiratory Syncytial Virus Acute Lower Respiratory Infection     | OR= 1.96 [1.44, 2.67]   |
| 62                                 |                           |               |              | X             |             |              |                        |            |            | 0-5y        | Respiratory Syncytial Virus Acute Lower Respiratory Infection     | OR= 1.91 [1.45, 2.53]   |
| 63                                 |                           |               | X            |               |             |              |                        |            |            | 0-5y        | Pneumonia Acute Lower Respiratory Infection                       | OR= 1.9 [1.3, 2.8]      |
| 63                                 |                           |               |              | X             |             |              |                        |            |            | 0-5y        | Pneumonia Acute Lower Respiratory Infection                       | OR= 3.18 [1.02, 9.90]   |
| 52                                 |                           |               | LT           |               |             |              |                        |            |            | <1y         | Infection Admission                                               | OR= 1.44 [1.03, 2.00]   |

| Ref                                                                                                                                                                                             | Exposures (size at birth) |               |              |               |             |              |                        |            |            |                     | Population   | Outcomes               | Effect size<br>[confidence interval],<br>direction of association |                             |                                         |
|-------------------------------------------------------------------------------------------------------------------------------------------------------------------------------------------------|---------------------------|---------------|--------------|---------------|-------------|--------------|------------------------|------------|------------|---------------------|--------------|------------------------|-------------------------------------------------------------------|-----------------------------|-----------------------------------------|
|                                                                                                                                                                                                 | Small                     |               |              |               |             | Cont         | Large                  |            |            |                     |              |                        |                                                                   |                             |                                         |
|                                                                                                                                                                                                 | EPT (<28wks)              | ELBW (<1000g) | VPT (<32wks) | VLBW (<1500g) | PT (<37wks) | LBW (<2500g) | SGA (<10th percentile) | BW (cont.) | GA (cont.) | Post Term (>42 wks) | HBW (>4000g) | LGA (>90th percentile) |                                                                   |                             |                                         |
|                                                                                                                                                                                                 |                           |               |              |               |             |              |                        |            |            |                     |              |                        |                                                                   | <b>Epilepsy</b>             |                                         |
| 64                                                                                                                                                                                              |                           |               |              | X             |             |              |                        |            |            |                     |              |                        | 0-85y                                                             | Epilepsy                    | OR= 2.16 [1.80, 2.58]                   |
| 64                                                                                                                                                                                              |                           |               |              | X             |             |              |                        |            |            |                     |              |                        | <5y                                                               | Epilepsy                    | OR= 3.01 [1.95, 4.66]                   |
| 64                                                                                                                                                                                              |                           |               |              | X             |             |              |                        |            |            |                     |              |                        | ≥5y                                                               | Epilepsy                    | OR= 2.01 [1.73, 2.34]                   |
| 64                                                                                                                                                                                              |                           |               |              |               |             |              |                        |            |            | 41                  |              |                        | 0-85y                                                             | Epilepsy                    | OR= 1.05 [0.98, 1.12]                   |
|                                                                                                                                                                                                 |                           |               |              |               |             |              |                        |            |            |                     |              |                        |                                                                   | <b>Quality of life</b>      |                                         |
| 65                                                                                                                                                                                              | X                         |               |              |               |             |              |                        |            |            |                     |              |                        | 8-28y                                                             | Health Utility (HUI2, HUI3) | β= -0.068 [-0.098, -0.038]              |
| 65                                                                                                                                                                                              |                           |               | X            |               |             |              |                        |            |            |                     |              |                        | 8-28y                                                             | Health Utility (HUI2, HUI3) | β= -0.030 [-0.030, -0.030]              |
| 65                                                                                                                                                                                              |                           |               |              | X             |             |              |                        |            |            |                     |              |                        | 5-28y                                                             | Health Utility (HUI2, HUI3) | β= -0.066 [-0.098, -0.035]              |
| 66                                                                                                                                                                                              |                           |               |              |               |             |              |                        |            | X          |                     |              |                        | 3-36m                                                             | Total Sleep Duration        | β= -0.11 [-0.15, -0.06] per wk increase |
| 66                                                                                                                                                                                              |                           |               |              |               |             |              |                        |            | X          |                     |              |                        | 3-36m                                                             | Night Sleep Duration        | β= -0.05 [-0.08, -0.02] per wk increase |
| 66                                                                                                                                                                                              |                           |               |              |               |             |              |                        |            | X          |                     |              |                        | 3-36m                                                             | Nap Duration                | β= -0.04 [-0.06, -0.01] per wk increase |
| (53) symbol (X) IUGR is defined as BW<10th percentile or BW<5th percentile or BW<3rd percentile (or -2 standard deviations); or the combination of BW percentile; or as ultrasound fetal weight |                           |               |              |               |             |              |                        |            |            |                     |              |                        |                                                                   |                             |                                         |

Table 1.c-Associations between size-at-birth and allergies and lung related ill-health outcomes

| Ref                                    | Exposures (size at birth) |               |              |               |             |              |                        |            |            |                     | Population   | Outcomes    | Effect size<br>[confidence interval],<br>direction of association |                                                |                                        |
|----------------------------------------|---------------------------|---------------|--------------|---------------|-------------|--------------|------------------------|------------|------------|---------------------|--------------|-------------|-------------------------------------------------------------------|------------------------------------------------|----------------------------------------|
|                                        | Small                     |               |              |               |             | Cont         | Large                  |            |            |                     |              |             |                                                                   |                                                |                                        |
|                                        | EPT (<28wks)              | ELBW (<1000g) | VPT (<32wks) | VLBW (<1500g) | PT (<37wks) | LBW (<2500g) | SGA (<10th percentile) | BW (cont.) | GA (cont.) | Post Term (>42 wks) | HBW (>4000g) | LGA (>90th) |                                                                   |                                                |                                        |
| <b>Atopic dermatitis</b>               |                           |               |              |               |             |              |                        |            |            |                     |              |             |                                                                   |                                                |                                        |
| 67                                     |                           | X             |              |               |             |              |                        |            |            |                     |              |             | 1-27y                                                             | Atopic dermatitis (Eczema)                     | RR= 0.78 [0.72, 0.85]                  |
| 67                                     |                           |               |              | X             |             |              |                        |            |            |                     |              |             | 1-27y                                                             | Atopic dermatitis (Eczema)                     | RR= 0.87 [0.83, 0.91]                  |
| 67                                     |                           |               |              | X             |             |              |                        |            |            |                     |              |             | ≤2y                                                               | Atopic dermatitis (Eczema)                     | RR= 0.92 [0.59, 1.41]                  |
| 67                                     |                           |               |              | X             |             |              |                        |            |            |                     |              |             | >2-5y                                                             | Atopic dermatitis (Eczema)                     | RR= 0.88 [0.84, 0.91]                  |
| 67                                     |                           |               |              | X             |             |              |                        |            |            |                     |              |             | >5y                                                               | Atopic dermatitis (Eczema)                     | RR= 0.87 [0.83, 0.90]                  |
| 67                                     |                           |               |              | LT            |             |              |                        |            |            |                     |              |             | 1-27y                                                             | Atopic dermatitis (Eczema)                     | RR= 0.88 [0.77, 1.00]                  |
| 68                                     |                           |               |              |               |             | ◇            |                        |            |            |                     |              |             | 1-8y                                                              | Atopic dermatitis (Eczema)                     | OR= 0.68 [0.63, 0.75]                  |
| 69                                     |                           |               |              |               |             |              |                        | X          |            |                     |              |             | ≤6-16y                                                            | Atopic dermatitis (ever)                       | OR= 1.17 [1.04, 1.32] per kg increase  |
| 69                                     |                           |               |              |               |             |              |                        | X          |            |                     |              |             | 6m-11y                                                            | Atopic dermatitis (current)                    | OR= 1.03 [0.87, 1.22] per kg increase  |
| 69                                     |                           |               |              |               |             |              |                        | X          |            |                     |              |             | ≤2y                                                               | Atopic dermatitis (ever or current)            | OR= 1.34 [1.08, 1.68] per kg increase  |
| 68                                     |                           |               |              |               |             |              |                        |            |            |                     | ◇            |             | 1-8y                                                              | Atopic dermatitis (Eczema)                     | OR= 1.09 [1.02, 1.17]                  |
| <b>Other Allergies</b>                 |                           |               |              |               |             |              |                        |            |            |                     |              |             |                                                                   |                                                |                                        |
| 69                                     |                           |               |              |               |             |              |                        | X          |            |                     |              |             | 18m-10y                                                           | Food Allergy                                   | OR= 1.44 [1.04, 1.99]                  |
| 69                                     |                           |               |              |               |             |              |                        | X          |            |                     |              |             | ≤16y                                                              | Allergic Rhinitis (ever)                       | OR= 1.02 [0.91, 1.14]                  |
| 69                                     |                           |               |              |               |             |              |                        | X          |            |                     |              |             | 4-10y                                                             | Allergic Rhinitis (current)                    | OR= 0.92 [0.69, 1.23]                  |
| <b>Lung Function</b>                   |                           |               |              |               |             |              |                        |            |            |                     |              |             |                                                                   |                                                |                                        |
| 70                                     |                           | X             | X            |               |             |              |                        |            |            |                     |              |             | 16-33y                                                            | FEV <sub>1</sub>                               | MD= -0.78 [-0.96, -0.61]               |
| 70                                     |                           | X             | X            |               |             |              |                        |            |            |                     |              |             | 16-33y                                                            | FVC                                            | MD= -0.25 [-0.40, -0.10]               |
| 70                                     |                           | X             | X            |               |             |              |                        |            |            |                     |              |             | 16-33y                                                            | FEV <sub>1</sub> /FVC                          | MD= -0.74 [-0.85, -0.64]               |
| 70                                     |                           | X             | X            |               |             |              |                        |            |            |                     |              |             | 16-33y                                                            | FEF <sub>25-75</sub>                           | MD= -0.88 [-1.12, -0.65]               |
| 71                                     |                           | X             |              |               |             |              |                        |            |            |                     |              |             | 6-14y                                                             | %FEV <sub>1</sub> (without BPD)                | MD= -7.41 [-9.46, -5.37]               |
| 71                                     |                           | X             |              |               |             |              |                        |            |            |                     |              |             | 6-14y                                                             | %FEV <sub>1</sub> (mild to severe BPD)         | MD= -10.54 [-12.90, -8.19]             |
| 71                                     |                           | X             |              |               |             |              |                        |            |            |                     |              |             | 6-14y                                                             | %FEV <sub>1</sub> (moderate to severe BPD)     | MD= -17.76 [-20.04, -15.47]            |
| 71                                     |                           | X             |              |               |             |              |                        |            |            |                     |              |             | 6-14y                                                             | FVC (without BPD)                              | MD= -3.0 [-7.8, 1.7]                   |
| 71                                     |                           | X             |              |               |             |              |                        |            |            |                     |              |             | 6-14y                                                             | FVC (mild BPD)                                 | MD= -4.2 [-9.4, 1.0]                   |
| 71                                     |                           | X             |              |               |             |              |                        |            |            |                     |              |             | 6-14y                                                             | FVC (moderate to severe BPD)                   | MD= -6.3 [-12.6, -0.1]                 |
| 71                                     |                           | X             |              |               |             |              |                        |            |            |                     |              |             | 6-14y                                                             | FEV <sub>1</sub> (without BPD)                 | MD= -5.6 [-10.6, -0.7]                 |
| 71                                     |                           | X             |              |               |             |              |                        |            |            |                     |              |             | 6-14y                                                             | FEV <sub>1</sub> (mild BPD)                    | MD= -9.9 [-15.3, -4.4]                 |
| 71                                     |                           | X             |              |               |             |              |                        |            |            |                     |              |             | 6-14y                                                             | FEV <sub>1</sub> (moderate to severe BPD)      | MD= -12.1 [-18.6, -5.6]                |
| 71                                     |                           | X             |              |               |             |              |                        |            |            |                     |              |             | 6-14y                                                             | FEV <sub>1</sub> /FVC (without BPD)            | MD= -2.8 [-6.2, 0.7]                   |
| 71                                     |                           | X             |              |               |             |              |                        |            |            |                     |              |             | 6-14y                                                             | FEV <sub>1</sub> /FVC (mild BPD)               | MD= -5.5 [-9.3, -1.7]                  |
| 71                                     |                           | X             |              |               |             |              |                        |            |            |                     |              |             | 6-14y                                                             | FEV <sub>1</sub> /FVC (moderate to severe BPD) | MD= -6.8 [-11.3, -2.2]                 |
| 71                                     |                           | X             |              |               |             |              |                        |            |            |                     |              |             | 6-14y                                                             | MEF <sub>50</sub> (without BPD)                | MD= -13.5 [-23.3, -3.7]                |
| 71                                     |                           | X             |              |               |             |              |                        |            |            |                     |              |             | 6-14y                                                             | MEF <sub>50</sub> (mild BPD)                   | MD= -22.0 [-32.7, -11.2]               |
| 71                                     |                           | X             |              |               |             |              |                        |            |            |                     |              |             | 6-14y                                                             | MEF <sub>50</sub> (moderate to severe BPD)     | MD= -26.6 [-39.5, -13.8]               |
| 71                                     |                           | X             |              |               |             |              |                        |            |            |                     |              |             | 6-14y                                                             | DLCO (without BPD)                             | MD= -1.8 [-7.7, 4.1]                   |
| 71                                     |                           | X             |              |               |             |              |                        |            |            |                     |              |             | 6-14y                                                             | DLCO (mild BPD)                                | MD= -8.0 [-14.7, -1.4]                 |
| 71                                     |                           | X             |              |               |             |              |                        |            |            |                     |              |             | 6-14y                                                             | DLCO (moderate to severe BPD)                  | MD= -9.9 [-17.6, -2.2]                 |
| 72                                     |                           |               |              | X             |             |              |                        |            |            |                     |              |             | 7-19y                                                             | %FEV <sub>1</sub> (without BPD cases)          | MD= -7.15 [-8.73, -5.58]               |
| 72                                     |                           |               |              | X             |             |              |                        |            |            |                     |              |             | 7-19y                                                             | %FEV <sub>1</sub> (including BPD cases)        | MD= -8.70 [-10.98, -6.42]              |
| 73                                     |                           |               |              | X             |             |              |                        |            |            |                     |              |             | 3.9-19.1y                                                         | FEV <sub>1</sub>                               | β= -0.20 [-0.26, -0.14]                |
| 73                                     |                           |               |              | X             |             |              |                        |            |            |                     |              |             | 3.9-19.1y                                                         | FEV <sub>1</sub> /FVC                          | β= -0.15 [-0.21, -0.09]                |
| 73                                     |                           |               |              | X             |             |              |                        |            |            |                     |              |             | 3.9-19.1y                                                         | FEF <sub>75</sub>                              | β= -0.19 [-0.27, -0.11]                |
| 73                                     |                           |               |              |               | X           |              |                        |            |            |                     |              |             | 3.9-19.1y                                                         | FEV <sub>1</sub>                               | β= -0.29 [-0.38, -0.21]                |
| 73                                     |                           |               |              |               | X           |              |                        |            |            |                     |              |             | 3.9-19.1y                                                         | FEV <sub>1</sub> /FVC                          | β= -0.16 [-0.25, -0.08]                |
| 73                                     |                           |               |              |               | X           |              |                        |            |            |                     |              |             | 3.9-19.1y                                                         | FEF <sub>75</sub>                              | β= -0.17 [-0.26, -0.08]                |
| 70                                     |                           |               |              |               |             |              |                        | X          |            |                     |              |             | 16-33y                                                            | FEV <sub>1</sub>                               | MD= 0.08 [0.04, 0.12] per wk increase  |
| 70                                     |                           |               |              |               |             |              |                        | X          |            |                     |              |             | 16-33y                                                            | FVC                                            | MD= 0.04 [0.004, 0.07] per wk increase |
| 70                                     |                           |               |              |               |             |              |                        | X          |            |                     |              |             | 16-33y                                                            | FEV <sub>1</sub> /FVC                          | MD= 0.06 [0.03, 0.09] per wk increase  |
| 70                                     |                           |               |              |               |             |              |                        | X          |            |                     |              |             | 16-33y                                                            | FEF <sub>25-75%</sub>                          | MD= 0.06 [0.03, 0.10] per wk increase  |
| <b>Lung Diseases (Asthma/whoezing)</b> |                           |               |              |               |             |              |                        |            |            |                     |              |             |                                                                   |                                                |                                        |
| 74                                     |                           | X             |              |               |             |              |                        |            |            |                     |              |             | 9m-12y                                                            | Whoezing Disorders                             | OR= 3.00 [2.61, 3.44]                  |
| 74                                     |                           |               |              | X             |             |              |                        |            |            |                     |              |             | 0-14y                                                             | Whoezing Disorders                             | OR= 1.71 [1.57, 1.87]                  |
| 74                                     |                           |               |              | X             |             |              |                        |            |            |                     |              |             | <5y                                                               | Whoezing Disorders                             | OR= 1.70 [1.49, 1.94]                  |
| 74                                     |                           |               |              | X             |             |              |                        |            |            |                     |              |             | ≥5y                                                               | Whoezing Disorders                             | OR= 1.71 [1.44, 2.03]                  |
| 74                                     |                           |               |              | X             |             |              |                        |            |            |                     |              |             | 0.5-11y                                                           | Whoezing                                       | OR= 1.63 [1.40, 1.90]                  |

| Ref | Exposures (size at birth) |               |              |               |             |              |                       |            |            |                     | Population   | Outcomes   | Effect size<br>[confidence interval],<br>direction of association |                                                                       |                                          |
|-----|---------------------------|---------------|--------------|---------------|-------------|--------------|-----------------------|------------|------------|---------------------|--------------|------------|-------------------------------------------------------------------|-----------------------------------------------------------------------|------------------------------------------|
|     | Small                     |               |              |               |             | Cont         | Large                 |            |            |                     |              |            |                                                                   |                                                                       |                                          |
|     | EPT (<28wks)              | ELBW (<1000g) | VPT (<32wks) | VLBW (<1500g) | PT (<37wks) | LBW (<2500g) | SGA(<10th percentile) | BW (cont.) | GA (cont.) | Post Term (>42 wks) | HBW (>4000g) | LGA(>90th) |                                                                   |                                                                       |                                          |
| 74  |                           |               |              | X             |             |              |                       |            |            |                     |              |            | 0-14y                                                             | Asthma                                                                | OR= 1.76 [1.57, 1.96]                    |
| 75  |                           |               |              | X             |             |              |                       |            |            |                     |              |            | 1-4y                                                              | Wheezing                                                              | OR= 1.34 [1.25, 1.43]                    |
| 76  |                           |               |              | X             |             |              |                       |            |            |                     |              |            | 1-31y                                                             | Asthma                                                                | aOR= 1.36 [1.30, 1.43]                   |
| 76  |                           |               |              | X             |             |              |                       |            |            |                     |              |            | <10y                                                              | Asthma                                                                | OR= 1.40 [1.11, 1.90]                    |
| 76  |                           |               |              | X             |             |              |                       |            |            |                     |              |            | ≥10y                                                              | Asthma                                                                | OR= 1.19 [0.93, 1.51]                    |
| 73  |                           |               |              | X             |             |              |                       |            |            |                     |              |            | 3.9-19.1y                                                         | Asthma                                                                | aOR= 1.34 [1.15, 1.57]                   |
| 77  |                           |               |              | X             |             |              |                       |            |            |                     |              |            | 0-6y                                                              | Asthma                                                                | HR= 1.29 [0.74, 2.23]                    |
| 75  |                           |               |              | X             |             |              |                       |            |            |                     |              |            | 5-10y                                                             | Asthma                                                                | OR= 1.40 [1.18, 1.67]                    |
| 74  |                           |               |              | LT            |             |              |                       |            |            |                     |              |            | 9m-11y                                                            | Wheezing Disorders                                                    | OR= 1.49 [1.34, 1.66]                    |
| 78  |                           |               |              |               | X           |              |                       |            |            |                     |              |            | 6m-16y                                                            | Wheezing Disorders                                                    | OR= 1.60 [1.39, 1.85]                    |
| 78  |                           |               |              |               | X           |              |                       |            |            |                     |              |            | 1-16y                                                             | Asthma                                                                | OR= 1.60 [1.36, 1.89]                    |
| 78  |                           |               |              |               | X           |              |                       |            |            |                     |              |            | 6m-16y                                                            | Wheezing                                                              | OR= 1.50 [0.95, 2.39]                    |
| 75  |                           |               |              |               | X           |              |                       |            |            |                     |              |            | 1-4y                                                              | Wheezing                                                              | OR= 1.10 [1.00, 1.21]                    |
| 79  |                           |               |              |               | X           |              |                       |            |            |                     |              |            | <3-16y                                                            | Asthma                                                                | Risk ratio= 1.15 [1.08, 1.22]            |
| 79  |                           |               |              |               | X           |              |                       |            |            |                     |              |            | ≤10y                                                              | Asthma                                                                | Risk ratio= 1.17 [1.06, 1.28]            |
| 79  |                           |               |              |               | X           |              |                       |            |            |                     |              |            | >10y                                                              | Asthma                                                                | Risk ratio= 1.15 [1.07, 1.23]            |
| 73  |                           |               |              |               | X           |              |                       |            |            |                     |              |            | 3.9-19.1y                                                         | Asthma                                                                | aOR= 1.32 [1.07, 1.62]                   |
| 77  |                           |               |              |               | X           |              |                       |            |            |                     |              |            | 0-6y                                                              | Asthma                                                                | HR= 1.43 [0.76, 2.70]                    |
| 80  |                           |               |              |               | X           |              |                       |            |            |                     |              |            | Children                                                          | Asthma                                                                | OR= 1.28 [1.09, 1.50]                    |
| 75  |                           |               |              |               | X           |              |                       |            |            |                     |              |            | 5-10y                                                             | Asthma                                                                | OR= 1.13 [1.01, 1.27]                    |
| 80  |                           |               |              |               | ◇           |              |                       |            |            |                     |              |            | Children                                                          | Asthma                                                                | OR= 1.34 [1.13, 1.60]                    |
| 78  |                           |               |              |               | ◇           |              |                       |            |            |                     |              |            | 1-18y                                                             | Wheezing Disorders                                                    | OR= 1.37 [1.05, 1.79]                    |
| 73  |                           |               |              |               |             | X            |                       |            |            |                     |              |            | 3.9-19.1y                                                         | Asthma                                                                | aOR= 1.18 [1.01, 1.37]                   |
| 73  |                           |               |              |               |             |              | X                     |            |            |                     |              |            | 3.9-19.1y                                                         | Asthma                                                                | aOR= 0.94 [0.90, 0.97] per 500g increase |
| 73  |                           |               |              |               |             |              |                       | X          |            |                     |              |            | 3.9-19.1y                                                         | Asthma                                                                | aOR= 0.98 [0.94, 1.03] per SDS increase  |
| 74  |                           |               |              |               |             |              |                       |            | X          |                     |              |            | 0.5-14y                                                           | Wheezing Disorders                                                    | aOR= 0.94 [0.92, 0.96] per wk increase   |
| 74  |                           |               |              |               |             |              |                       |            | X          |                     |              |            | <5y                                                               | Wheezing Disorders                                                    | aOR= 0.96 [0.94, 0.97] per wk increase   |
| 74  |                           |               |              |               |             |              |                       |            | X          |                     |              |            | ≥5y                                                               | Wheezing Disorders                                                    | aOR= 0.93 [0.92, 0.95] per wk increase   |
| 74  |                           |               |              |               |             |              |                       |            | X          |                     |              |            | 9m-14y                                                            | Wheezing Disorders (parental reported)                                | aOR= 0.95 [0.92, 0.97] per wk increase   |
| 74  |                           |               |              |               |             |              |                       |            | X          |                     |              |            | 0.5-11y                                                           | Wheezing Disorders (doctor diagnosed)                                 | aOR= 0.93 [0.91, 0.96] per wk increase   |
| 74  |                           |               |              |               |             |              |                       |            | X          |                     |              |            | 0.5-6y                                                            | Wheezing                                                              | aOR= 0.95 [0.93, 0.96] per wk increase   |
| 74  |                           |               |              |               |             |              |                       |            | X          |                     |              |            | 1-14y                                                             | Asthma                                                                | aOR= 0.93 [0.90, 0.96] per wk increase   |
| 73  |                           |               |              |               |             |              |                       |            | X          |                     |              |            | 3.9-19.1y                                                         | Asthma                                                                | aOR= 0.94 [0.92, 0.97] per wk increase   |
| 77  |                           |               |              |               |             |              |                       |            |            | X                   |              |            | 0-6y                                                              | Asthma                                                                | HR= 1.02 [0.71, 1.47]                    |
| 78  |                           |               |              |               |             |              |                       |            |            |                     | X            |            | 1-18y                                                             | Wheezing Disorders                                                    | OR= 1.02 [0.99, 1.04]                    |
| 78  |                           |               |              |               |             |              |                       |            |            |                     |              | X          | 1-18y                                                             | Asthma                                                                | OR= 1.33 [0.95, 1.85]                    |
| 81  |                           |               |              |               |             |              |                       |            |            |                     |              | X          | 6m-31y                                                            | Asthma                                                                | RR= 1.2 [1.1, 1.3]                       |
| 77  |                           |               |              |               |             |              |                       |            |            |                     |              | X          | 0-6y                                                              | Asthma                                                                | HR= 0.93 [0.72, 1.21]                    |
| 80  |                           |               |              |               |             |              |                       |            |            |                     |              | X          | Children                                                          | Asthma                                                                | OR= 1.06 [0.93, 1.21]                    |
| 80  |                           |               |              |               |             |              |                       |            |            |                     |              | ◇          | Children                                                          | Asthma                                                                | OR= 1.04 [0.92, 1.19]                    |
| 52  |                           |               |              | LT            |             |              |                       |            |            |                     |              |            | 2-6y                                                              | Asthma Admission                                                      | HR= 1.22 [1.13, 1.32]                    |
|     |                           |               |              |               |             |              |                       |            |            |                     |              |            |                                                                   | <b>Other lung related outcomes</b>                                    |                                          |
| 52  |                           |               |              | LT            |             |              |                       |            |            |                     |              |            | <1y                                                               | Respiratory Problem Admission                                         | OR= 2.02 [1.26, 3.23]                    |
| 82  |                           |               |              | X             |             |              |                       |            |            |                     |              |            | 6-33y                                                             | Fractional Exhaled Nitric Oxide (FeNO) (ppb)                          | MD= -0.74 [-1.88, 0.41]                  |
| 82  |                           |               |              | X             |             |              |                       |            |            |                     |              |            | 6-33y                                                             | Fractional Exhaled Nitric Oxide (FeNO) with CLD (ppb)                 | MD= -2.82 [-5.87, 0.22]                  |
| 83  |                           |               |              | X             |             |              |                       |            |            |                     |              |            | 5-22y                                                             | Bronchial Hyper-Responsiveness                                        | OR= 1.88 [1.32, 2.66]                    |
| 83  |                           |               |              | X             |             |              |                       |            |            |                     |              |            | 7-22y                                                             | Bronchial Hyper-Responsiveness (after methacholine challenge)         | OR= 1.89 [1.12, 3.19]                    |
| 83  |                           |               |              | X             |             |              |                       |            |            |                     |              |            | 6-14y                                                             | Bronchial Hyper-Responsiveness (after an exercise test)               | OR= 2.59 [1.50, 4.50]                    |
| 83  |                           |               |              | X             |             |              |                       |            |            |                     |              |            | 5-22y                                                             | Bronchial Hyper-Responsiveness had CLD                                | OR= 4.54 [2.68, 7.69]                    |
| 83  |                           |               |              | X             |             |              |                       |            |            |                     |              |            | 7-22y                                                             | Bronchial Hyper-Responsiveness had CLD (after methacholine challenge) | OR= 4.35 [2.36, 8.03]                    |
| 83  |                           |               |              | X             |             |              |                       |            |            |                     |              |            | 6-14y                                                             | Bronchial Hyper-Responsiveness had CLD(after an exercise test)        | OR= 5.13 [1.82, 14.47]                   |



Table 1.d-Associations between size-at-birth and chronic ill-health outcomes

| Ref                          | Exposures (size at birth) |               |              |               |             |                 |                        |            |            |                     | Population | Outcomes | Effect size<br>[confidence interval],<br>direction of association |                                             |                                          |
|------------------------------|---------------------------|---------------|--------------|---------------|-------------|-----------------|------------------------|------------|------------|---------------------|------------|----------|-------------------------------------------------------------------|---------------------------------------------|------------------------------------------|
|                              | Small                     |               |              |               |             | Cont            | Large                  |            |            |                     |            |          |                                                                   |                                             |                                          |
|                              | EPT (<28wks)              | ELBW (<1000g) | VPT (<32wks) | VLBW (<1500g) | PT (<37wks) | LBW (<2500g)    | SGA (<10th percentile) | BW (cont.) | GA (cont.) | Post Term (>42 wks) |            |          |                                                                   | HBW (>4000g)                                | LGA (>90th)                              |
| <b>Hypertension</b>          |                           |               |              |               |             |                 |                        |            |            |                     |            |          |                                                                   |                                             |                                          |
| 84                           | X                         |               |              |               |             |                 |                        |            |            |                     |            |          | Child/Adult                                                       | Systolic Blood Pressure (mmHg)              | MD= 2.31 [0.27, 4.36]                    |
| 84                           | X                         |               |              |               |             |                 |                        |            |            |                     |            |          | Child/Adult                                                       | Diastolic Blood Pressure (mmHg)             | MD= 0.61 [-0.28, 1.50]                   |
| 85                           |                           | X             | △            |               |             |                 |                        |            |            |                     |            |          | 11y                                                               | Systolic Blood Pressure (mmHg)              | MD= 4.6 (0.73)                           |
| 85                           |                           | X             | △            |               |             |                 |                        |            |            |                     |            |          | 11y                                                               | Systolic Blood Pressure (pc)                | MD= 9.8 (1.2)                            |
| 85                           |                           | X             | △            |               |             |                 |                        |            |            |                     |            |          | 11y                                                               | Diastolic Blood Pressure (pc)               | MD= 9.3 (5.9)                            |
| 85                           |                           | X             | △            |               |             |                 |                        |            |            |                     |            |          | 11y                                                               | Diastolic Blood Pressure (mmHg)             | MD= 2.3 (0.9)                            |
| 85                           |                           | X             | △            |               |             |                 |                        |            |            |                     |            |          | 11y                                                               | Blood Pressure >95 pc                       | OR= 1.37, p= 0.049                       |
| 84                           |                           | X             |              |               |             |                 |                        |            |            |                     |            |          | Child/Adult                                                       | Systolic Blood Pressure (mmHg)              | MD= 2.12 [1.25, 3.00]                    |
| 84                           |                           | X             |              |               |             |                 |                        |            |            |                     |            |          | Child/Adult                                                       | Diastolic Blood Pressure (mmHg)             | MD= 0.45 [-0.22, 1.12]                   |
| 86                           |                           | X             | X            |               |             |                 |                        |            |            |                     |            |          | 7-20.7y                                                           | Systolic Blood Pressure (mmHg)              | MD= 3.30 [2.43, 4.18]                    |
| 86                           |                           |               | X            | X             |             |                 |                        |            |            |                     |            |          | 5-30y                                                             | Systolic Blood Pressure (mmHg)              | MD= 2.50 [1.67, 3.32]                    |
| 84                           |                           |               |              | X             |             |                 |                        |            |            |                     |            |          | 5-45y                                                             | Systolic Blood Pressure (mmHg)              | MD= 3.26 [2.08, 4.44]                    |
| 84                           |                           |               |              | X             |             |                 |                        |            |            |                     |            |          | <10y                                                              | Systolic Blood Pressure (mmHg)              | MD= 1.03 [-1.13, 3.18]                   |
| 84                           |                           |               |              | X             |             |                 |                        |            |            |                     |            |          | <10-19y                                                           | Systolic Blood Pressure (mmHg)              | MD= 2.00 [1.17, 2.83]                    |
| 84                           |                           |               |              | X             |             |                 |                        |            |            |                     |            |          | 10-19y                                                            | Systolic Blood Pressure (mmHg)              | MD= 3.24 [0.90, 5.57]                    |
| 87                           |                           |               |              | X             |             |                 |                        |            |            |                     |            |          | 6.6-49y                                                           | Systolic Blood Pressure (mmHg)              | SMD= 0.35 [0.22, 0.48]                   |
| 87                           |                           |               |              | X             |             |                 |                        |            |            |                     |            |          | 10.6-26y                                                          | ABPM-Systolic Blood Pressure                | SMD= 0.33 [0.18, 0.49]                   |
| 87                           |                           |               |              | X             |             |                 |                        |            |            |                     |            |          | 10.6-35.8y                                                        | ABPM-Systolic Blood Pressure Daytime        | SMD= 0.35 [0.20, 0.49]                   |
| 87                           |                           |               |              | X             |             |                 |                        |            |            |                     |            |          | 10.6-35.8y                                                        | ABPM-Systolic Blood Pressure Night-time     | SMD= 0.22 [0.07, 0.37]                   |
| 84                           |                           |               |              | X             |             |                 |                        |            |            |                     |            |          | 5-45y                                                             | Diastolic Blood Pressure (mmHg)             | MD= 1.32 [0.61, 2.04]                    |
| 84                           |                           |               |              | X             |             |                 |                        |            |            |                     |            |          | <10y                                                              | Diastolic Blood Pressure (mmHg)             | MD= 1.46 [0.33, 2.60]                    |
| 84                           |                           |               |              | X             |             |                 |                        |            |            |                     |            |          | <10-19y                                                           | Diastolic Blood Pressure (mmHg)             | MD= -0.98 [-0.41, 1.45]                  |
| 84                           |                           |               |              | X             |             |                 |                        |            |            |                     |            |          | 10-19y                                                            | Diastolic Blood Pressure (mmHg)             | MD= 1.14 [-0.36, 2.63]                   |
| 87                           |                           |               |              | X             |             |                 |                        |            |            |                     |            |          | 6.6-49y                                                           | Diastolic Blood Pressure                    | SMD= 0.33 [0.20, 0.47]                   |
| 87                           |                           |               |              | X             |             |                 |                        |            |            |                     |            |          | 10.6-26y                                                          | ABPM-Diastolic Blood Pressure               | SMD= 0.23 [0.07, 0.39]                   |
| 87                           |                           |               |              | X             |             |                 |                        |            |            |                     |            |          | 10.6-35.8y                                                        | ABPM-Diastolic Blood Pressure Daytime       | SMD= 0.19 [0.05, 0.33]                   |
| 87                           |                           |               |              | X             |             |                 |                        |            |            |                     |            |          | 10.6-35.8y                                                        | ABPM-Diastolic Blood Pressure Night-time    | SMD= 0.19 [-0.01, 0.38]                  |
| 88                           |                           |               |              |               | X           |                 |                        |            |            |                     |            |          | 4-84y                                                             | Systolic Blood Pressure (mmHg)              | MD= 2.58 [1.51, 3.64]                    |
| 88                           |                           |               |              |               | X           |                 |                        |            |            |                     |            |          | 5-84y                                                             | Diastolic Blood Pressure (mmHg)             | MD= 1.01 [0.19, 1.83]                    |
| 89                           |                           |               |              |               |             | X               |                        |            |            |                     |            |          | Child/Adult                                                       | Systolic Blood Pressure (mmHg)              | aβ= -2.00 [-2.49, -1.50] per kg increase |
| 89                           |                           |               |              |               |             | X               |                        |            |            |                     |            |          | <18y                                                              | Systolic Blood Pressure (mmHg)              | aβ= -1.64 [-2.16, -1.12] per kg increase |
| 90                           |                           |               |              |               |             | X               |                        |            |            |                     |            |          | 0-71y                                                             | Systolic Blood Pressure (mmHg)              | β= -1.38 [-1.66, -1.10] per kg increase  |
| 91                           |                           |               |              |               |             | X <sub>GA</sub> |                        |            |            |                     |            |          | 8.1-38.1y                                                         | Systolic Blood Pressure (mmHg)              | β= -2.02 [-3.07, -0.97]                  |
| 91                           |                           |               |              |               |             | GA              |                        |            |            |                     |            |          | 8.1-38.1y                                                         | Systolic Blood Pressure (mmHg)              | β= -0.84 [-3.55, 1.87]                   |
| 91                           |                           |               |              |               |             | X               |                        |            |            |                     |            |          | 8.1-38.1y                                                         | Systolic Blood Pressure (mmHg)              | β= -2.30 [-3.53, -1.07]                  |
| 91                           |                           |               |              |               |             | X               |                        |            |            |                     |            |          | 14.5-32.8y                                                        | Diastolic Blood Pressure (mmHg)             | β= -0.74 [-1.64, 0.10]                   |
| 92                           |                           |               |              |               |             |                 |                        | X          |            |                     |            |          | 16-70y                                                            | Systolic Blood Pressure (Females) (mmHg/kg) | β= 3.27 [1.39, 5.16]                     |
| 92                           |                           |               |              |               |             |                 |                        | X          |            |                     |            |          | 16-70y                                                            | Systolic Blood Pressure (Males) (mmHg/kg)   | β= 0.42 [0.02, 0.83]                     |
| 92                           |                           |               |              |               |             |                 |                        | ◇          |            |                     |            |          | 16-70y                                                            | Systolic Blood Pressure (Females) (mmHg/kg) | β= 2.96 [0.85, 5.07]                     |
| 92                           |                           |               |              |               |             |                 |                        | ◇          |            |                     |            |          | 16-70y                                                            | Systolic Blood Pressure (Males) (mmHg/kg)   | β= 0.44 [-0.02, 0.89]                    |
| 88                           |                           |               |              |               |             |                 |                        | X          |            |                     |            |          | 5-84y                                                             | Systolic Blood Pressure (mmHg)              | MD= -2.08 [-2.98, -1.17]                 |
| 88                           |                           |               |              |               |             |                 |                        | X          |            |                     |            |          | 5-84y                                                             | Diastolic Blood Pressure (mmHg)             | MD= -0.37 [-1.19, 0.45]                  |
| 93                           |                           |               |              |               |             |                 |                        | ◇          | X          |                     |            |          | 6-59y                                                             | Systolic Blood Pressure (mmHg)              | WMD= -0.25 [-0.92, 0.42]                 |
| 93                           |                           |               |              |               |             |                 |                        | ◇          | X          |                     |            |          | 6-11y                                                             | Systolic Blood Pressure (mmHg)              | WMD= 1.40 [0.20, 2.61]                   |
| 93                           |                           |               |              |               |             |                 |                        | ◇          | X          |                     |            |          | 6-60y                                                             | Diastolic Blood Pressure (mmHg)             | WMD= 0.20 [-0.23, 0.62]                  |
| 93                           |                           |               |              |               |             |                 |                        | ◇          | X          |                     |            |          | 6-12y                                                             | Diastolic Blood Pressure (mmHg)             | WMD= 0.96 [0.57, 1.35]                   |
| 94                           |                           |               |              |               |             | XI              |                        |            |            |                     |            |          | 0.04-48.6y                                                        | Blood Pressure (mmHg)                       | MD= -0.56 [-1.72, 0.60]                  |
| 94                           |                           |               |              |               |             | XI              |                        |            |            |                     |            |          | <18y                                                              | Blood Pressure (mmHg)                       | MD= -0.54 [-1.88, 0.81]                  |
| 95                           |                           |               |              |               |             |                 | X                      |            |            |                     |            |          | 7-50y                                                             | Blood pressure (mmHg): Unpaired twins       | aβ= -2.0 [-3.2, -0.8] per kg increase    |
| 95                           |                           |               |              |               |             |                 | X                      |            |            |                     |            |          | 7-50y                                                             | Blood pressure (mmHg): Paired twins         | aβ= -0.4 [-1.5, 0.7] per kg increase     |
| 88                           |                           |               |              | X             |             |                 |                        |            |            |                     |            |          | 6-84y                                                             | Hypertension                                | OR= 1.21 [1.13, 1.30]                    |
| 88                           |                           |               |              |               |             |                 |                        | X          |            |                     |            |          | 12-84y                                                            | Hypertension                                | OR= 0.78 [0.71, 0.86]                    |
| 93                           |                           |               |              |               |             |                 |                        | ◇          | X          |                     |            |          | 4-80y                                                             | Hypertension                                | RR= 1.00 [0.93, 1.06]                    |
| 93                           |                           |               |              |               |             |                 |                        | ◇          | X          |                     |            |          | 4-12y                                                             | Hypertension                                | RR= 1.18 [1.05, 1.32]                    |
| <b>Hypercholesterolaemia</b> |                           |               |              |               |             |                 |                        |            |            |                     |            |          |                                                                   |                                             |                                          |
| 84                           |                           |               |              | X             |             |                 |                        |            |            |                     |            |          | 8-35.7y                                                           | Total Cholesterol (mmol/L)                  | SMD= 0.12 [-0.05, 0.30]                  |
| 84                           |                           |               |              | X             |             |                 |                        |            |            |                     |            |          | 10-19y                                                            | Total Cholesterol (mmol/L)                  | SMD= -0.02 [-0.10, 0.07]                 |

| Ref                                              | Exposures (size at birth) |               |              |               |             |              |                       |            |                 |                     | Population   | Outcomes    | Effect size<br>[confidence interval],<br>direction of association |                                                   |
|--------------------------------------------------|---------------------------|---------------|--------------|---------------|-------------|--------------|-----------------------|------------|-----------------|---------------------|--------------|-------------|-------------------------------------------------------------------|---------------------------------------------------|
|                                                  | Small                     |               |              |               |             | Cont         | Large                 |            |                 |                     |              |             |                                                                   |                                                   |
|                                                  | EPT (<28wks)              | ELBW (<1000g) | VPT (<32wks) | VLBW (<1500g) | PT (<37wks) | LBW (<2500g) | SGA(<10th percentile) | BW (cont.) | GA (cont.)      | Post Term (>42 wks) | HBW (>4000g) | LGA (>90th) |                                                                   |                                                   |
| 91                                               |                           |               |              |               |             |              |                       |            | X <sub>CA</sub> |                     |              | 16.5-50.4y  | Cholesterol (mmol/L)                                              | $\beta = -0.07$ [-0.11, -0.04]                    |
| 96                                               |                           |               |              |               |             |              |                       |            | X               |                     |              | 0-84y       | Cholesterol (mmol/L)                                              | aWMD= -0.036 [-0.047, -0.025]                     |
| 97                                               |                           |               |              |               |             |              |                       |            | X               |                     |              | 13-16y      | Total Cholesterol (mmol/L)                                        | $\beta = -0.061$ [-0.131, 0.008] per kg increase  |
| 97                                               |                           |               |              |               |             |              |                       |            | X               |                     |              | 0-70y       | Total Cholesterol (mmol/L)                                        | $\beta = -0.048$ [-0.078, -0.018] per kg increase |
| 98                                               |                           |               |              |               |             |              |                       |            | X               |                     |              | 6-70y       | Total Cholesterol: Males (mmol/L)                                 | a $\beta = -0.04$ [-0.07, -0.02] per kg increase  |
| 98                                               |                           |               |              |               |             |              |                       |            | X               |                     |              | 6-70y       | Total Cholesterol: Females (mmol/L)                               | a $\beta = -0.01$ [-0.04, 0.02] per kg increase   |
| 99                                               |                           |               |              |               |             |              |                       |            | X               |                     |              | 16-75y      | Total Cholesterol (mmol/L)                                        | a $\beta = 0.038$ [0.00984, 0.0661] per kg lower  |
| 84                                               |                           |               |              | X             |             |              |                       |            |                 |                     |              | 8-35.7y     | High Density Lipoprotein (HDL) (mmol/L)                           | SMD= -0.00 [-0.12, 0.11]                          |
| 84                                               |                           |               |              | X             |             |              |                       |            |                 |                     |              | 10-19y      | High Density Lipoprotein (mmol/L)                                 | SMD= 0.00 [-0.08, 0.08]                           |
| 84                                               |                           |               |              | X             |             |              |                       |            |                 |                     |              | 9-35.7y     | Low Density Lipoprotein (LDL) (mmol/L)                            | SMD= 0.02 [-0.10, 0.14]                           |
| 84                                               |                           |               |              | X             |             |              |                       |            |                 |                     |              | 8-45y       | Triglycerides (mmol/L)                                            | SMD= 0.03 [-0.06, 0.12]                           |
| 84                                               |                           |               |              | X             |             |              |                       |            |                 |                     |              | 10-19y      | Triglycerides (mmol/L)                                            | SMD= 0.02 [-0.11, 0.07]                           |
| 99                                               |                           |               |              |               |             |              |                       |            | X               |                     |              | 16-75y      | Total Triglycerides (mmol/L)                                      | a $\beta = 0.043$ [0.0301, 0.0563] per kg lower   |
| 99                                               |                           |               |              |               |             |              |                       |            | X               |                     |              | 16-75y      | Total Phospholipids (mmol/L)                                      | a $\beta = 0.015$ [0.000414, 0.0298] per kg lower |
| 99                                               |                           |               |              |               |             |              |                       |            | X               |                     |              | 16-75y      | Total Fatty acids (mmol/L)                                        | a $\beta = 0.197$ [0.122, 0.272] per kg lower     |
| 100                                              |                           |               |              |               |             |              |                       |            | X               |                     |              | 0.9-75.8y   | Circulating Cortisol Levels (nmol/L)                              | $\beta = 25.3$ [5.9, 44.8] (per 1 kg lowe)        |
| 99                                               |                           |               |              |               |             |              |                       |            | X               |                     |              | 16-75y      | Saturated Fatty Acids (mmol/L)                                    | a $\beta = 0.082$ [0.0521, 0.112] per kg lower    |
| <b>Coronary Heart Disease and Heart Function</b> |                           |               |              |               |             |              |                       |            |                 |                     |              |             |                                                                   |                                                   |
| 101                                              |                           | X             |              |               |             |              |                       |            |                 |                     |              | >1-35y      | Left Ventricular Ejection Fraction (%)                            | WMD= 1.15 [0.35, 1.95]                            |
| 101                                              |                           | X             |              |               |             |              |                       |            |                 |                     |              | <28d        | Left Ventricular Ejection Fraction (%)                            | WMD= -2.48 [-5.78, 0.82]                          |
| 101                                              |                           | X             |              |               |             |              |                       |            |                 |                     |              | ≥28d-1y     | Left Ventricular Ejection Fraction (%)                            | WMD= -1.97 [-4.38, 0.44]                          |
| 101                                              |                           | X             |              |               |             |              |                       |            |                 |                     |              | >1-≤14y     | Left Ventricular Ejection Fraction (%)                            | WMD= 1.67 [-0.48, 3.82]                           |
| 101                                              |                           | X             |              |               |             |              |                       |            |                 |                     |              | >1-35y      | Left Ventricular Peak Systolic Tissue Velocity (cm/s)             | WMD= -0.61 [-0.88, -0.34]                         |
| 101                                              |                           | X             |              |               |             |              |                       |            |                 |                     |              | <28d        | Left Ventricular Peak Systolic Tissue Velocity (cm/s)             | WMD= -0.93 [-1.15, -0.71]                         |
| 101                                              |                           | X             |              |               |             |              |                       |            |                 |                     |              | ≥28d-1y     | Left Ventricular Peak Systolic Tissue Velocity (cm/s)             | WMD= -0.10 [-0.60, 0.40]                          |
| 101                                              |                           | X             |              |               |             |              |                       |            |                 |                     |              | >1-≤14y     | Left Ventricular Peak Systolic Tissue Velocity (cm/s)             | WMD= -0.73 [-1.05, -0.41]                         |
| 101                                              |                           | X             |              |               |             |              |                       |            |                 |                     |              | >1-35y      | Right Ventricular Strain (%)                                      | WMD= 3.02 [2.23, 3.82]                            |
| 101                                              |                           | X             |              |               |             |              |                       |            |                 |                     |              | <28d        | Right Ventricular Strain (%)                                      | WMD= 3.87 [1.54, 6.20]                            |
| 101                                              |                           | X             |              |               |             |              |                       |            |                 |                     |              | ≥28d-1y     | Right Ventricular Strain (%)                                      | WMD= 3.01 [0.81, 5.22]                            |
| 101                                              |                           | X             |              |               |             |              |                       |            |                 |                     |              | >1-35y      | Left Ventricular Peak Early Diastolic Tissue velocity(cm/s)       | WMD= -1.12 [-1.54, -0.70]                         |
| 101                                              |                           | X             |              |               |             |              |                       |            |                 |                     |              | <28d        | Left Ventricular Peak Early Diastolic Tissue velocity(cm/s)       | WMD= -1.93 [-2.46, -1.39]                         |
| 101                                              |                           | X             |              |               |             |              |                       |            |                 |                     |              | ≥28d-1y     | Left Ventricular Peak Early Diastolic Tissue velocity(cm/s)       | WMD= -1.48 [-2.63, -0.32]                         |
| 101                                              |                           | X             |              |               |             |              |                       |            |                 |                     |              | >1-≤14y     | Left Ventricular Peak Early Diastolic Tissue velocity(cm/s)       | WMD= -1.28 [-1.82, -0.74]                         |
| 102                                              |                           |               |              | X             |             |              |                       |            |                 |                     |              | 3m-16y      | Carotid Intima-Media Thickness (cm)                               | SMD= 0.03 [-0.17, 0.22]                           |
| 102                                              |                           |               |              | X             |             |              |                       |            |                 |                     |              | 2-16y       | Carotid Intima-Media Thickness (cm)                               | SMD= 0.02 [-0.20, 0.25]                           |
| 101                                              |                           |               |              | X             |             |              |                       |            |                 |                     |              | >1-35y      | Left Ventricular Ejection Fraction (%)                            | WMD= 0.79 [0.02, 1.55]                            |
| 101                                              |                           |               |              | X             |             |              |                       |            |                 |                     |              | <28d        | Left Ventricular Ejection Fraction (%)                            | WMD= -2.89 [-5.18, -0.61]                         |
| 101                                              |                           |               |              | X             |             |              |                       |            |                 |                     |              | ≥28d-1y     | Left Ventricular Ejection Fraction (%)                            | WMD= -1.58 [-3.60, 0.44]                          |
| 101                                              |                           |               |              | X             |             |              |                       |            |                 |                     |              | >1-≤14y     | Left Ventricular Ejection Fraction (%)                            | WMD= 1.67 [-0.48, 3.82]                           |
| 101                                              |                           |               |              | X             |             |              |                       |            |                 |                     |              | >1-35y      | Left Ventricular Peak Systolic Tissue Velocity (cm/s)             | WMD= -0.34 [-0.83, 0.14]                          |
| 101                                              |                           |               |              | X             |             |              |                       |            |                 |                     |              | <28d        | Left Ventricular Peak Systolic Tissue Velocity (cm/s)             | WMD= -0.81 [-1.13, -0.49]                         |
| 101                                              |                           |               |              | X             |             |              |                       |            |                 |                     |              | ≥28d-1y     | Left Ventricular Peak Systolic Tissue Velocity (cm/s)             | WMD= 0.13 [-0.52, 0.78]                           |
| 101                                              |                           |               |              | X             |             |              |                       |            |                 |                     |              | >1-≤14y     | Left Ventricular Peak Systolic Tissue Velocity (cm/s)             | WMD= -0.73 [-1.05, -0.41]                         |
| 101                                              |                           |               |              | X             |             |              |                       |            |                 |                     |              | <28d        | Right Ventricular Strain (%)                                      | WMD= 2.94 [0.54, 5.35]                            |
| 101                                              |                           |               |              | X             |             |              |                       |            |                 |                     |              | ≥28d-1y     | Right Ventricular Strain (%)                                      | WMD= 2.73 [0.89, 4.57]                            |
| 101                                              |                           |               |              | X             |             |              |                       |            |                 |                     |              | >1-35y      | Right Ventricular Strain (%)                                      | WMD= 3.02 [2.23, 3.82]                            |
| 101                                              |                           |               |              | X             |             |              |                       |            |                 |                     |              | >1-35y      | Left Ventricular Peak Early Diastolic Tissue velocity(cm/s)       | WMD= -1.05 [-1.46, -0.65]                         |
| 101                                              |                           |               |              | X             |             |              |                       |            |                 |                     |              | <28d        | Left Ventricular Peak Early Diastolic Tissue velocity (cm/s)      | WMD= -1.19 [-1.76, -0.62]                         |
| 101                                              |                           |               |              | X             |             |              |                       |            |                 |                     |              | ≥28d-1y     | Left Ventricular Peak Early Diastolic Tissue velocity(cm/s)       | WMD= -0.87 [-1.50, -0.23]                         |
| 101                                              |                           |               |              | X             |             |              |                       |            |                 |                     |              | >1-≤14y     | Left Ventricular Peak Early Diastolic Tissue velocity(cm/s)       | WMD= -1.28 [-1.82, -0.74]                         |
| 102                                              |                           |               |              |               |             | X            |                       |            |                 |                     |              | 0-16y       | Left Ventricular Peak Early Diastolic Tissue velocity (cm/s)      | SMD= 0.40 [0.15, 0.64]                            |
| 102                                              |                           |               |              |               |             | X            |                       |            |                 |                     |              | 0-1y        | Left Ventricular Peak Early Diastolic Tissue velocity (cm/s)      | SMD= 0.63 [-0.02, 1.27]                           |
| 102                                              |                           |               |              |               |             | X            |                       |            |                 |                     |              | 2-16y       | Left Ventricular Peak Early Diastolic Tissue velocity (cm/s)      | SMD= 0.31 [0.06, 0.55]                            |
| 102                                              |                           |               |              |               |             | XI           |                       |            |                 |                     |              | 0-16y       | Carotid Intima-Media Thickness (cm)                               | SMD= 0.35 [-0.06, 0.77]                           |
| 102                                              |                           |               |              |               |             |              | X                     |            |                 |                     |              | 0-16y       | Carotid Intima-Media Thickness (cm)                               | $\beta = -0.06$ [-0.19, 0.08]                     |
| 103                                              |                           |               |              |               |             |              |                       |            | X               |                     |              | 11-85y      | Non-fatal and Fatal Ischemic Heart Disease                        | aRR= 0.84 [0.81, 0.88] per 1kg increase           |
| 103                                              |                           |               |              |               |             |              |                       |            | X               |                     |              | 15-85y      | Fatal Ischemic Heart Disease                                      | aRR= 0.84 [0.80, 0.88] per kg increase            |
| 104                                              |                           |               |              |               |             |              |                       |            | X               |                     |              | 11-85y      | Combined for Non-Fatal And Fatal CHD                              | RR= 0.83 [0.80, 0.86] per kg increase             |
| 101                                              |                           |               |              |               |             |              |                       |            |                 |                     |              | 11-85y      | Additional data on paper 101 in appendix                          | Additional data on paper 101 in appendix          |

| Ref                                 | Exposures (size at birth) |               |              |               |             |              |                       |            |            |                     | Population   | Outcomes   | Effect size<br>[confidence interval],<br>direction of association |                                                                   |                                                               |
|-------------------------------------|---------------------------|---------------|--------------|---------------|-------------|--------------|-----------------------|------------|------------|---------------------|--------------|------------|-------------------------------------------------------------------|-------------------------------------------------------------------|---------------------------------------------------------------|
|                                     | Small                     |               |              |               |             | Cont         |                       |            |            |                     |              |            |                                                                   | Large                                                             |                                                               |
|                                     | EPT (<28wks)              | ELBW (<1000g) | VPT (<32wks) | VLBW (<1500g) | PT (<37wks) | LBW (<2500g) | SGA(<10th percentile) | BW (cont.) | GA (cont.) | Post Term (>42 wks) | HBW (>4000g) | LGA(>90th) |                                                                   |                                                                   |                                                               |
| <b>Kidney Related Diseases</b>      |                           |               |              |               |             |              |                       |            |            |                     |              |            |                                                                   |                                                                   |                                                               |
| 105                                 | X                         |               |              |               |             |              |                       |            |            |                     |              |            | 5.3-20.7y                                                         | Glomerular Filtration Rate (mL/min/1.73m <sup>2</sup> ) (%)       | MD= -13 [-8, -25]                                             |
| 85                                  | X                         | △             |              |               |             |              |                       |            |            |                     |              |            | 11y                                                               | Estimated Glomerular Filtration Rate (mL/min/1.73m <sup>2</sup> ) | MD= -11.27 (1.27)                                             |
| 85                                  | X                         | △             |              |               |             |              |                       |            |            |                     |              |            | 11y                                                               | Glomerular Filtration Rate <90 (mL/min/1.73m <sup>2</sup> )       | Prevalence ratio= 3.08 , p<0.001<br>SMD= -0.54 [-0.85, -0.22] |
| 87                                  |                           |               |              |               | X           |              |                       |            |            |                     |              |            | 8-14y                                                             | Glomerular Filtration Rate                                        | WMD= -4.55 [-0.08, -0.23]                                     |
| 106                                 |                           |               |              |               |             | X            |                       |            |            |                     |              |            | 6.1-41y                                                           | Glomerular Filtration Rate (mL/min/1.73m <sup>2</sup> )           | OR= 2.09 [1.33, 2.85] per kg increase                         |
| 106                                 |                           |               |              |               |             |              |                       | X          |            |                     |              |            | 6-64y                                                             | Estimated Glomerular Filtration Rate (mL/min/1.73m <sup>2</sup> ) | MD= 0.085 (0.031)                                             |
| 85                                  | X                         | △             |              |               |             |              |                       |            |            |                     |              |            | 11y                                                               | Cystatin (mg/L)                                                   | Prevalence ratio= 3.13 , p<0.001                              |
| 85                                  | X                         | △             |              |               |             |              |                       |            |            |                     |              |            | 11y                                                               | High Serum Cystatin C Level >0.95 mg/L                            | SMD= 0.36 [-0.12, 0.85]                                       |
| 87                                  |                           |               |              |               | X           |              |                       |            |            |                     |              |            | 10.7-23.2y                                                        | Cystatin-C                                                        | MD= -0.449 (0.02)                                             |
| 85                                  | X                         | △             |              |               |             |              |                       |            |            |                     |              |            | 11y                                                               | Absolute Left Kidney Length (cm)                                  | MD= -0.03 (0.001)                                             |
| 85                                  | X                         | △             |              |               |             |              |                       |            |            |                     |              |            | 11y                                                               | Relative Left Kidney Length                                       | MD= -0.447 (0.07)                                             |
| 85                                  | X                         | △             |              |               |             |              |                       |            |            |                     |              |            | 11y                                                               | Absolute Right Kidney Length (cm)                                 | MD= -0.02 (0.007)                                             |
| 85                                  | X                         | △             |              |               |             |              |                       |            |            |                     |              |            | 11y                                                               | Relative Right Kidney Length                                      | SMD= -0.73 [-1.04, -0.41]                                     |
| 87                                  |                           |               |              |               | X           |              |                       |            |            |                     |              |            | 10.7-20.7y                                                        | Kidney Length (cm)                                                | SMD= -0.82 [-1.05, -0.60]                                     |
| 87                                  |                           |               |              |               | X           |              |                       |            |            |                     |              |            | 10.7-23.2y                                                        | Kidney Volume (cm <sup>3</sup> )                                  | SMD= -0.57 [-0.79, -0.35]                                     |
| 87                                  |                           |               |              |               | X           |              |                       |            |            |                     |              |            | 10.7-23.2y                                                        | Relative Kidney Volume (cm <sup>3</sup> /m <sup>2</sup> )         | OR= 0.712 per week increase                                   |
| 85                                  |                           |               |              |               |             |              |                       | X          |            |                     |              |            | 11y                                                               | Low Relative Kidney Length                                        | SMD= 0.13 [-0.27, 0.52]                                       |
| 87                                  |                           |               |              |               | X           |              |                       |            |            |                     |              |            | 10.7-14y                                                          | Blood Urea Nitrogen                                               | SMD= -0.07 [-0.49, 0.34]                                      |
| 87                                  |                           |               |              |               | X           |              |                       |            |            |                     |              |            | 20.7-23.2y                                                        | Serum Renin                                                       | SMD= -0.39 [-0.74, -0.04]                                     |
| 87                                  |                           |               |              |               | X           |              |                       |            |            |                     |              |            | 8-26y                                                             | Effective Renal Plasma Flow                                       | SMD= 0.25 [0.07, 0.43]                                        |
| 87                                  |                           |               |              |               | X           |              |                       |            |            |                     |              |            | 6.7-23.2y                                                         | Urine Albumin To Creatinine Ratio                                 | SMD= -0.03 [-0.21, 0.16]                                      |
| 87                                  |                           |               |              |               | X           |              |                       |            |            |                     |              |            | 8.6-23.2y                                                         | Serum Creatinine (mg/dL)                                          | WMD= -1.09 [-2.32, 0.14]                                      |
| 106                                 |                           |               |              |               |             | X            |                       |            |            |                     |              |            | 5.8-38y                                                           | Albumin Creatinine Ratio                                          | OR= 1.81 [1.19, 2.77]                                         |
| 107                                 |                           |               |              |               |             | X            |                       |            |            |                     |              |            | 8.8-61y                                                           | Albuminuria                                                       | OR= 1.73 [1.44, 2.08]                                         |
| 107                                 |                           |               |              |               |             | X            |                       |            |            |                     |              |            | 8.8-61y                                                           | Risk of Chronic Kidney Disease(Albuminuria, ESRD, EGFR,Other)     | OR= 1.77 [1.42, 2.20]                                         |
| 106                                 |                           |               |              |               |             | X            |                       |            |            |                     |              |            | <1-75y                                                            | Chronic Kidney Disease (assessed by blood)                        | OR= 1.68 [1.27, 2.33]                                         |
| 106                                 |                           |               |              |               |             | X            |                       |            |            |                     |              |            | 8.8-61y                                                           | Chronic Kidney Disease (assessed by urine)                        | OR= 1.09 [0.91, 1.32]                                         |
| 106                                 |                           |               |              |               |             |              |                       |            | X          |                     |              |            | <1-75y                                                            | Chronic Kidney Disease                                            |                                                               |
| <b>Diabetes</b>                     |                           |               |              |               |             |              |                       |            |            |                     |              |            |                                                                   |                                                                   |                                                               |
| <b>Type 1 Diabetes</b>              |                           |               |              |               |             |              |                       |            |            |                     |              |            |                                                                   |                                                                   |                                                               |
| 108                                 |                           |               |              | X             |             |              |                       |            |            |                     |              |            | <6-37y                                                            | Type 1 Diabetes                                                   | OR= 1.18 [1.11, 1.25]                                         |
| 109                                 |                           |               |              |               | X           |              |                       |            |            |                     |              |            | ≤20y                                                              | Type 1 Diabetes                                                   | OR= 0.82 [0.54, 1.23]                                         |
| 110                                 |                           |               |              |               | ◇           |              |                       |            |            |                     |              |            | Children                                                          | Type 1 Diabetes                                                   | HR= 0.78 [0.69, 0.88]                                         |
| 111                                 |                           |               |              |               | ◇           |              |                       |            |            |                     |              |            | 0-19y                                                             | Type 1 Diabetes                                                   | OR= 0.98 [0.84, 1.13]                                         |
| 109                                 |                           |               |              |               | ◇           |              |                       |            |            |                     |              |            | ≤20y                                                              | Type 1 Diabetes                                                   | OR= 1.02 [0.71, 1.46]                                         |
| 110                                 |                           |               |              |               |             |              | X                     |            |            |                     |              |            | Children                                                          | Type 1 Diabetes                                                   | β= -0.00032, p= 0.001                                         |
| 109                                 |                           |               |              |               |             |              | X                     |            |            |                     |              |            | ≤20y                                                              | Type 1 Diabetes                                                   | OR= 1.07 [0.99, 1.15] per kg increase                         |
| 112                                 |                           |               |              |               |             |              |                       | X          |            |                     |              |            | <18y                                                              | Type 1 Diabetes                                                   | OR= 1.15 [1.05, 1.26]                                         |
| 109                                 |                           |               |              |               |             |              |                       | X          |            |                     |              |            | ≤20y                                                              | Type 1 Diabetes                                                   | OR= 1.17 [1.09, 1.26]                                         |
| 109                                 |                           |               |              |               |             |              |                       | ◇          |            |                     |              |            | ≤20y                                                              | Type 1 Diabetes                                                   | OR= 1.19 [1.02, 1.38]                                         |
| 110                                 |                           |               |              |               |             |              |                       | ◇          |            |                     |              |            | Children                                                          | Type 1 Diabetes                                                   | HR= 1.08 [1.00, 1.17]                                         |
| 111                                 |                           |               |              |               |             |              |                       | ◇          |            |                     |              |            | 0-19y                                                             | Type 1 Diabetes                                                   | OR= 1.10 [1.03, 1.18]                                         |
| 112                                 |                           |               |              |               |             |              |                       |            | X          |                     |              |            | <18y                                                              | Type 1 Diabetes                                                   | OR= 1.10 [1.03, 1.21]                                         |
| <b>Type 2 Diabetes</b>              |                           |               |              |               |             |              |                       |            |            |                     |              |            |                                                                   |                                                                   |                                                               |
| 113                                 |                           |               |              |               |             | X            |                       |            |            |                     |              |            | 6-84y                                                             | Type 2 Diabetes                                                   | OR= 1.51 [1.43, 1.58]                                         |
| 114                                 |                           |               |              |               |             | X            |                       |            |            |                     |              |            | 6-75y                                                             | Type 2 Diabetes                                                   | OR= 1.32 [1.06, 1.64]                                         |
| 113                                 |                           |               |              |               |             | ◇            |                       |            |            |                     |              |            | 6-76y                                                             | Type 2 Diabetes                                                   | OR= 1.41 [1.26, 1.58]                                         |
| 114                                 |                           |               |              |               |             | ◇            |                       |            |            |                     |              |            | 6-75y                                                             | Type 2 Diabetes                                                   | OR= 1.47 [1.26, 1.72]                                         |
| 114                                 |                           |               |              |               |             |              |                       | X          |            |                     |              |            | 6-75y                                                             | Type 2 Diabetes                                                   | OR= 1.27 [1.01, 1.59]                                         |
| 114                                 |                           |               |              |               |             |              |                       | ◇          |            |                     |              |            | 6-75y                                                             | Type 2 Diabetes                                                   | OR= 1.36 [1.07, 1.73]                                         |
| 113                                 |                           |               |              |               |             |              |                       | ◇          |            |                     |              |            | 6-76y                                                             | Type 2 Diabetes                                                   | OR= 1.1 [1.00, 1.24]                                          |
| <b>Diabetes related measurement</b> |                           |               |              |               |             |              |                       |            |            |                     |              |            |                                                                   |                                                                   |                                                               |
| 84                                  |                           |               |              | X             |             |              |                       |            |            |                     |              |            | 3-45y                                                             | Fasting Blood Glucose (mg/dl)                                     | SMD= -0.32 [-0.70, 0.07]                                      |
| 84                                  |                           |               |              | X             |             |              |                       |            |            |                     |              |            | 10-19y                                                            | Fasting Blood Glucose (mg/dl)                                     | SMD= -0.12 [-0.35, 0.12]                                      |
| 115                                 |                           |               |              |               | X           | X            |                       |            |            |                     |              |            | 6.5-41y                                                           | Fasting Blood Glucose (mmol/L)                                    | MD= 0.05 [-0.03, 0.14]                                        |
| 115                                 |                           |               |              |               | X           | X            |                       |            |            |                     |              |            | ≤10y                                                              | Fasting Blood Glucose (mmol/L)                                    | MD= 0.08 [-0.04, 0.20]                                        |

| Ref | Exposures (size at birth) |               |              |               |             |              |                        |            |            |                     | Population   | Outcomes    | Effect size<br>[confidence interval],<br>direction of association |                                                   |                                               |
|-----|---------------------------|---------------|--------------|---------------|-------------|--------------|------------------------|------------|------------|---------------------|--------------|-------------|-------------------------------------------------------------------|---------------------------------------------------|-----------------------------------------------|
|     | Small                     |               |              |               |             | Cont         |                        |            |            |                     |              |             |                                                                   | Large                                             |                                               |
|     | EPT (<28wks)              | ELBW (<1000g) | VPT (<32wks) | VLBW (<1500g) | PT (<37wks) | LBW (<2500g) | SGA (<10th percentile) | GA (cont.) | GA (cont.) | Post Term (>42 wks) | HBW (>4000g) | LGA (>90th) |                                                                   |                                                   |                                               |
| 115 |                           |               |              |               |             | X            | X                      |            |            |                     |              |             | >10-20y                                                           | Fasting Blood Glucose (mmol/L)                    | MD= 0.14 [0.04, 0.24]                         |
| 115 |                           |               |              |               |             | X            | X                      |            |            |                     |              |             | 8.6-41y                                                           | OGTT 2-h Glucose (mmol/L)                         | MD= 0.32 [0.13, 0.52]                         |
| 115 |                           |               |              |               |             | X            | X                      |            |            |                     |              |             | >10-20y                                                           | OGTT 2-h Glucose (mmol/L)                         | MD= 0.40 [0.08, 0.71]                         |
| 84  |                           |               |              | X             |             |              |                        |            |            |                     |              |             | 3-35.7y                                                           | Fasting Insulin (mIU/mL)                          | SMD= 0.06 [-0.34, 0.45]                       |
| 84  |                           |               | X            |               |             |              |                        |            |            |                     |              |             | <10y                                                              | Fasting Insulin (mIU/mL)                          | SMD= -0.54 [-1.13, 0.04]                      |
| 115 |                           |               |              |               |             | X            | X                      |            |            |                     |              |             | 6.5-26y                                                           | Fasting Insulin (pmol/L)                          | MD= 7.47 [1.77, 13.17]                        |
| 115 |                           |               |              |               |             | X            | X                      |            |            |                     |              |             | ≤10y                                                              | Fasting Insulin (pmol/L)                          | MD= 5.15 [-4.49, 14.79]                       |
| 115 |                           |               |              |               |             | X            | X                      |            |            |                     |              |             | >10-20y                                                           | Fasting Insulin (pmol/L)                          | MD= 6.56 [-4.54, 17.65]                       |
| 115 |                           |               |              |               |             | X            | X                      |            |            |                     |              |             | 8.6-23.9y                                                         | OGTT 2-h Insulin (pmol/L)                         | MD= 105.55 [65.43, 145.66]                    |
| 115 |                           |               |              |               |             | X            | X                      |            |            |                     |              |             | ≤10y                                                              | OGTT 2-h Insulin (pmol/L)                         | MD= 118.51 [56.8, 180.22]                     |
| 115 |                           |               |              |               |             | X            | X                      |            |            |                     |              |             | >10-20y                                                           | OGTT 2-h Insulin (pmol/L)                         | MD= 65.89 [-50, 181.78]                       |
| 99  |                           |               |              |               |             |              |                        | X          |            |                     |              |             | 16-75y                                                            | Insulin (IU/L)                                    | αβ= 0.0426 [0.0282, 0.0569] per kg lower      |
| 99  |                           |               |              |               |             |              |                        | X          |            |                     |              |             | 16-75y                                                            | Glycolysis and Gluconeogenesis: Glucose (mmol/L)  | αβ= 0.00367 [-0.000407, 0.00775] per kg lower |
| 99  |                           |               |              |               |             |              |                        | X          |            |                     |              |             | 16-75y                                                            | Glycolysis and Gluconeogenesis: Pyruvate (μmol/L) | αβ= 2.12 [1.29, 2.95] per kg lower            |
|     |                           |               |              |               |             |              |                        |            |            |                     |              |             |                                                                   | <b>Cancer</b>                                     |                                               |
|     |                           |               |              |               |             |              |                        |            |            |                     |              |             |                                                                   | <b>Paediatric CNS Tumour</b>                      |                                               |
| 116 |                           |               | X            |               |             |              |                        |            |            |                     |              |             | 28d-≤21y                                                          | Neuroblastoma                                     | OR= 1.09 [0.90, 1.32]                         |
| 117 |                           |               |              | X             |             |              |                        |            |            |                     |              |             | 0-18y                                                             | Neuroblastoma                                     | OR= 1.24 [1.00, 1.55]                         |
| 117 |                           |               |              | ◊             |             |              |                        |            |            |                     |              |             | 0-18y                                                             | Neuroblastoma                                     | OR= 1.23 [0.98, 1.55]                         |
| 117 |                           |               |              |               |             | X            |                        |            |            |                     |              |             | 0-18y                                                             | Neuroblastoma                                     | β= 0.52 [0.28, 0.96]                          |
| 117 |                           |               |              |               |             |              |                        |            | X          |                     |              |             | 0-18y                                                             | Neuroblastoma                                     | OR= 1.19 [1.04, 1.36]                         |
| 117 |                           |               |              |               |             |              |                        |            |            | ◊                   |              |             | 0-18y                                                             | Neuroblastoma                                     | OR= 1.21 [1.05, 1.39]                         |
| 118 |                           |               |              | X             |             |              |                        |            |            |                     |              |             | <19y                                                              | Astrocytoma                                       | OR= 0.85 [0.58, 1.25]                         |
| 119 |                           |               |              | X             |             |              |                        |            |            |                     |              |             | <19y                                                              | Astrocytoma                                       | OR= 0.96 [0.79, 1.16]                         |
| 120 |                           |               |              | X             |             |              |                        |            |            |                     |              |             | 0-19y                                                             | Astrocytoma                                       | OR= 0.98 [0.86, 1.11]                         |
| 120 |                           |               |              | X             |             |              |                        |            |            |                     |              |             | 0-14y                                                             | Astrocytoma                                       | OR= 0.99 [0.82, 1.19]                         |
| 120 |                           |               |              | X             |             |              |                        |            |            |                     |              |             | 0-19y                                                             | Low-grade Astrocytoma                             | OR= 0.75 [0.60, 0.95]                         |
| 120 |                           |               |              | X             |             |              |                        |            |            |                     |              |             | 0-19y                                                             | High-grade Astrocytoma                            | OR= 1.18 [0.78, 1.79]                         |
| 120 |                           |               |              |               | X           |              |                        |            |            |                     |              |             | 0-15y                                                             | Astrocytoma                                       | OR= 0.70 [0.51, 0.97]                         |
| 120 |                           |               |              |               |             | X            |                        |            |            |                     |              |             | 0-19y                                                             | Astrocytoma                                       | OR= 1.04 [1.02, 1.05] per 500g increase       |
| 120 |                           |               |              |               |             | X            |                        |            |            |                     |              |             | 0-19y                                                             | Low-grade Astrocytoma                             | OR= 1.02 [0.99, 1.05] per 500g increase       |
| 120 |                           |               |              |               |             | X            |                        |            |            |                     |              |             | 0-19y                                                             | High-grade Astrocytoma                            | OR= 1.05 [1.02, 1.08] per 500g increase       |
| 118 |                           |               |              |               |             | X            |                        |            |            |                     |              |             | <19y                                                              | Astrocytoma                                       | linear trend= 19% [4, 36] increase per 1000g  |
| 119 |                           |               |              |               |             |              |                        |            | X          |                     |              |             | <19y                                                              | Astrocytoma                                       | OR= 1.60 [1.23, 2.09]                         |
| 118 |                           |               |              |               |             |              |                        |            | X          |                     |              |             | <19y                                                              | Astrocytoma                                       | OR= 1.38 [1.07, 1.79]                         |
| 120 |                           |               |              |               |             |              |                        |            | X          |                     |              |             | 0-19y                                                             | Astrocytoma                                       | OR= 1.22 [1.13, 1.31]                         |
| 120 |                           |               |              |               |             |              |                        |            | X          |                     |              |             | 0-5y                                                              | Astrocytoma                                       | OR= 1.34 [0.93, 1.93]                         |
| 120 |                           |               |              |               |             |              |                        |            | X          |                     |              |             | 0-14y                                                             | Astrocytoma                                       | OR= 1.25 [1.14, 1.37]                         |
| 120 |                           |               |              |               |             |              |                        |            | X          |                     |              |             | 0-19y                                                             | Low-grade Astrocytoma                             | OR= 1.15 [1.02, 1.29]                         |
| 120 |                           |               |              |               |             |              |                        |            | X          |                     |              |             | 0-19y                                                             | High-grade Astrocytoma                            | OR= 1.60 [1.21, 2.11]                         |
| 120 |                           |               |              |               |             |              |                        |            |            | X                   |              |             | 0-15y                                                             | Astrocytoma                                       | OR= 0.96 [0.75, 1.21]                         |
| 118 |                           |               |              | X             |             |              |                        |            |            |                     |              |             | <15y                                                              | Ependymoma                                        | OR= 1.65 [0.60, 4.53]                         |
| 119 |                           |               |              | X             |             |              |                        |            |            |                     |              |             | ≤15y                                                              | Ependymoma                                        | OR= 0.87 [0.54, 1.39]                         |
| 120 |                           |               |              | X             |             |              |                        |            |            |                     |              |             | 0-38y                                                             | Ependymoma                                        | OR= 1.10 [0.76, 1.61]                         |
| 120 |                           |               |              | X             |             |              |                        |            |            |                     |              |             | 0-14y                                                             | Ependymoma                                        | OR= 0.98 [0.53, 1.79]                         |
| 120 |                           |               |              |               | X           |              |                        |            |            |                     |              |             | 0-15y                                                             | Ependymoma                                        | OR= 1.89 [1.00, 3.58]                         |
| 120 |                           |               |              |               |             | X            |                        |            |            |                     |              |             | 0-17y                                                             | Ependymoma                                        | OR= 1.01 [0.98, 1.05] per 500g increase       |
| 120 |                           |               |              |               |             |              |                        |            | X          |                     |              |             | 0-38y                                                             | Ependymoma                                        | OR= 1.12 [0.94, 1.34]                         |
| 120 |                           |               |              |               |             |              |                        |            | X          |                     |              |             | 0-14y                                                             | Ependymoma                                        | OR= 1.27 [1.05, 1.55]                         |
| 118 |                           |               |              |               |             |              |                        |            | X          |                     |              |             | <15y                                                              | Ependymoma                                        | OR= 1.15 [0.65, 2.04]                         |
| 119 |                           |               |              |               |             |              |                        |            | X          |                     |              |             | ≤15y                                                              | Ependymoma                                        | OR= 1.18 [0.97, 1.43]                         |
| 120 |                           |               |              |               |             |              |                        |            |            | X                   |              |             | 0-15y                                                             | Ependymoma                                        | OR= 1.52 [0.95, 2.54]                         |
| 116 |                           |               | X            |               |             |              |                        |            |            |                     |              |             | ≤15y                                                              | Primary Central Nervous System Tumour             | OR= 1.05 [0.93, 1.17]                         |
| 120 |                           |               |              | X             |             |              |                        |            |            |                     |              |             | 0-19y                                                             | Central Nervous System Tumour                     | OR= 1.03 [0.93, 1.13]                         |
| 120 |                           |               |              | X             |             |              |                        |            |            |                     |              |             | 0-5y                                                              | Central Nervous System Tumour                     | OR= 1.02 [0.75, 1.39]                         |
| 120 |                           |               |              | X             |             |              |                        |            |            |                     |              |             | 0-14y                                                             | Central Nervous System Tumour                     | OR= 1.04 [0.95, 1.14]                         |
| 120 |                           |               |              |               | X           |              |                        |            |            |                     |              |             | 0-14y                                                             | Central Nervous System Tumour                     | OR= 0.93 [0.84, 1.02]                         |
| 120 |                           |               |              |               |             | X            |                        |            |            |                     |              |             | 0-19y                                                             | Central Nervous System Tumour                     | OR= 1.03 [1.01, 1.04] per 500g increase       |

| Ref | Exposures (size at birth) |               |              |               |             |              |                       |            |            |                     | Population   | Outcomes    | Effect size<br>[confidence interval],<br>direction of association |                                         |  |
|-----|---------------------------|---------------|--------------|---------------|-------------|--------------|-----------------------|------------|------------|---------------------|--------------|-------------|-------------------------------------------------------------------|-----------------------------------------|--|
|     | Small                     |               |              |               |             | Cont         | Large                 |            |            |                     |              |             |                                                                   |                                         |  |
|     | EPT (<28wks)              | ELBW (<1000g) | VPT (<32wks) | VLBW (<1500g) | PT (<37wks) | LBW (<2500g) | SGA(<10th percentile) | BW (cont.) | GA (cont.) | Post Term (>42 wks) | HBW (>4000g) | LGA (>90th) |                                                                   |                                         |  |
| 120 |                           |               |              |               |             |              |                       |            |            |                     | X            | 0-24y       | Central Nervous System Tumour                                     | OR= 1.14 [1.08, 1.20]                   |  |
| 120 |                           |               |              |               |             |              |                       |            |            |                     | X            | 0-5y        | Central Nervous System Tumour                                     | OR= 1.20 [1.07, 1.36]                   |  |
| 120 |                           |               |              |               |             |              |                       |            |            |                     | X            | 0-14y       | Central Nervous System Tumour                                     | OR= 1.14 [1.09, 1.20]                   |  |
| 112 |                           |               |              |               |             |              |                       |            |            |                     | X            | Children    | Central Nervous System Tumour                                     | aOR= 1.15 [1.05, 1.27]                  |  |
| 120 |                           |               |              |               |             |              |                       |            |            |                     | X            | 0-14y       | Central Nervous System Tumour                                     | OR= 1.12 [1.03, 1.22]                   |  |
| 112 |                           |               |              |               |             |              |                       |            |            |                     | X            | Children    | Central Nervous System Tumour                                     | aOR= 1.09 [0.95, 1.23]                  |  |
| 120 |                           |               |              |               |             | X            |                       |            |            |                     |              | 0-19y       | Embryonal Tumour                                                  | OR= 1.06 [0.88, 1.26]                   |  |
| 120 |                           |               |              |               |             | X            |                       |            |            |                     |              | 0-14y       | Embryonal Tumour                                                  | OR= 1.14 [0.94, 1.38]                   |  |
| 120 |                           |               |              |               |             | X            |                       |            |            |                     |              | 0-19y       | Medulloblastoma                                                   | OR= 0.98 [0.62, 1.56]                   |  |
| 120 |                           |               |              |               |             | X            |                       |            |            |                     |              | 0-15y       | Embryonal Tumour                                                  | OR= 1.18 [0.57, 2.44]                   |  |
| 120 |                           |               |              |               |             |              |                       | X          |            |                     |              | 0-19y       | Embryonal Tumour                                                  | OR= 1.02 [1.01, 1.04] per 500g increase |  |
| 120 |                           |               |              |               |             |              |                       | X          |            |                     |              | 0-19y       | Medulloblastoma                                                   | OR= 1.03 [0.94, 1.13] per 500g increase |  |
| 120 |                           |               |              |               |             |              |                       |            |            | X                   |              | 0-19y       | Embryonal Tumour                                                  | OR= 1.16 [1.04, 1.29]                   |  |
| 120 |                           |               |              |               |             |              |                       |            |            | X                   |              | 0-5y        | Embryonal Tumour                                                  | OR= 1.15 [0.79, 1.67]                   |  |
| 120 |                           |               |              |               |             |              |                       |            |            | X                   |              | 0-14y       | Embryonal Tumour                                                  | OR= 1.18 [1.05, 1.32]                   |  |
| 120 |                           |               |              |               |             |              |                       |            |            |                     | X            | 0-15y       | Embryonal Tumour                                                  | OR= 1.10 [0.68, 1.77]                   |  |
| 118 |                           |               |              |               |             | X            |                       |            |            |                     |              | <19y        | Medulloblastoma and Primitive Neuroectodermal Tumours             | OR= 1.64 [0.42, 6.48]                   |  |
| 119 |                           |               |              |               |             | X            |                       |            |            |                     |              | <19y        | Medulloblastoma and Primitive Neuroectodermal Tumours             | OR= 1.19 [1.02, 1.39]                   |  |
| 119 |                           |               |              |               |             | X            |                       |            |            |                     |              | ≤15y        | Medulloblastoma                                                   | OR= 1.15 [0.92, 1.43]                   |  |
| 118 |                           |               |              |               |             |              |                       |            |            |                     | X            | <19y        | Medulloblastoma and Primitive Neuroectodermal Tumours             | OR= 1.27 [1.02, 1.60]                   |  |
| 119 |                           |               |              |               |             |              |                       |            |            |                     | X            | <19y        | Medulloblastoma and Primitive Neuroectodermal Tumours             | OR= 1.20 [1.07, 1.35]                   |  |
| 119 |                           |               |              |               |             |              |                       |            |            |                     | X            | <16y        | Medulloblastoma                                                   | OR= 1.31 [1.08, 1.58]                   |  |
| 120 |                           |               |              |               |             |              |                       |            |            |                     | X            | 0-19y       | Medulloblastoma                                                   | OR= 0.91 [0.69, 1.21]                   |  |
| 119 |                           |               |              |               |             | X            |                       |            |            |                     |              | <19y        | Primitive Neuroectodermal Tumours                                 | OR= 1.24 [0.96, 1.60]                   |  |
| 119 |                           |               |              |               |             |              |                       |            |            |                     | X            | <19y        | Primitive Neuroectodermal Tumours                                 | OR= 1.16 [0.92, 1.46]                   |  |
| 120 |                           |               |              |               |             | X            |                       |            |            |                     |              | 0-21y       | Other Gliomas                                                     | OR= 0.99 [0.59, 1.66]                   |  |
| 120 |                           |               |              |               |             |              |                       | X          |            |                     |              | 0-21y       | Other Gliomas                                                     | OR= 1.02 [0.99, 1.06] per 500g increase |  |
| 120 |                           |               |              |               |             |              |                       |            |            |                     | X            | 0-21y       | Other Gliomas                                                     | OR= 1.21 [0.93, 1.56]                   |  |
| 120 |                           |               |              |               |             | X            |                       |            |            |                     |              | 0-21y       | Other Specified Tumours                                           | OR= 0.75 [0.48, 1.19]                   |  |
| 120 |                           |               |              |               |             |              |                       | X          |            |                     |              | 0-21y       | Other Specified Tumours                                           | OR= 1.03 [0.96, 1.10] per 500g increase |  |
| 120 |                           |               |              |               |             |              |                       |            |            |                     | X            | 0-21y       | Other Specified Tumours                                           | OR= 1.14 [0.90, 1.45]                   |  |
| 120 |                           |               |              |               |             | X            |                       |            |            |                     |              | 0-21y       | Unspecified Tumours                                               | OR= 1.26 [0.68, 2.32]                   |  |
| 120 |                           |               |              |               |             |              |                       | X          |            |                     |              | 0-21y       | Unspecified Tumours                                               | OR= 1.01 [0.95, 1.06] per 500g increase |  |
| 120 |                           |               |              |               |             |              |                       |            |            |                     | X            | 0-21y       | Unspecified Tumours                                               | OR= 1.19 [0.84, 1.67]                   |  |
|     |                           |               |              |               |             |              |                       |            |            |                     |              |             | <b>Leukaemia</b>                                                  |                                         |  |
| 121 |                           |               |              |               |             | X            |                       |            |            |                     |              | <20y        | Acute Leukaemia                                                   | OR= 1.09 [1.02, 1.17]                   |  |
| 121 |                           |               |              |               |             | X            |                       |            |            |                     |              | <5y         | Acute Leukaemia                                                   | OR= 1.05 [0.97, 1.15]                   |  |
| 122 |                           |               |              |               |             | X            |                       |            |            |                     |              | <38y        | Leukaemia                                                         | OR= 1.06 [0.98, 1.13]                   |  |
| 123 |                           |               |              |               |             |              |                       | X          |            |                     |              | <15y        | Leukaemia                                                         | HR= 1.25 [0.89, 1.75]                   |  |
| 123 |                           |               |              |               |             |              |                       | X          |            |                     |              | <3y         | Leukaemia                                                         | HR= 1.29 [0.79, 2.11]                   |  |
| 123 |                           |               |              |               |             |              |                       | X          |            |                     |              | ≥3y         | Leukaemia                                                         | HR= 1.57 [0.96, 2.57]                   |  |
| 122 |                           |               |              |               |             |              |                       |            | X          |                     |              | <38y        | Leukaemia                                                         | OR= 1.01 [0.90, 1.13]                   |  |
| 122 |                           |               |              |               |             |              |                       |            | X          |                     |              | ≤9y         | Leukaemia                                                         | OR= 0.91 [0.79, 1.04]                   |  |
| 122 |                           |               |              |               |             |              |                       |            | X          |                     |              | 9-16y       | Leukaemia                                                         | OR= 1.03 [0.92, 1.15]                   |  |
| 123 |                           |               |              |               |             |              |                       |            |            | X                   |              | <15y        | Leukaemia                                                         | HR= 1.25 [0.80, 1.96]                   |  |
| 123 |                           |               |              |               |             |              |                       |            |            | X                   |              | <3y         | Leukaemia                                                         | HR= 1.08 [0.55, 2.13]                   |  |
| 123 |                           |               |              |               |             |              |                       |            |            | X                   |              | ≥3y         | Leukaemia                                                         | HR= 1.56 [0.84, 2.88]                   |  |
| 112 |                           |               |              |               |             |              |                       |            |            |                     | X            | Children    | Leukaemia                                                         | aOR= 1.29 [1.20, 1.39]                  |  |
| 124 |                           |               |              |               |             | X            |                       |            |            |                     |              | <20y        | Leukaemia                                                         | OR= 1.03 [0.87, 1.23]                   |  |
| 124 |                           |               |              |               |             | X            |                       |            |            |                     |              | <20y        | Acute Lymphoblastic Leukaemia                                     | OR= 0.97 [0.81, 1.16]                   |  |
| 124 |                           |               |              |               |             | X            |                       |            |            |                     |              | <20y        | Acute Myeloid Leukaemia                                           | OR= 1.50 [1.05, 2.13]                   |  |
| 124 |                           |               |              |               |             |              |                       | X          |            |                     |              | <20y        | Leukaemia                                                         | OR= 1.18 [1.12, 1.23] per kg increase   |  |
| 124 |                           |               |              |               |             |              |                       | X          |            |                     |              | <20y        | Acute Lymphoblastic Leukaemia                                     | OR= 1.18 [1.12, 1.23] per kg increase   |  |
| 125 |                           |               |              |               |             |              |                       | X          |            |                     |              | 0-29y       | Acute Lymphoblastic Leukaemia and Leukaemia Combined              | OR= 1.14 [1.08, 1.20]                   |  |
| 125 |                           |               |              |               |             |              |                       |            |            | X                   |              | 0-29y       | Acute Lymphoblastic Leukaemia and Leukaemia Combined              | OR= 1.26 [1.17, 1.37]                   |  |
| 124 |                           |               |              |               |             |              |                       |            |            | X                   |              | <20y        | Leukaemia                                                         | OR= 1.35 [1.24, 1.48]                   |  |
| 124 |                           |               |              |               |             |              |                       |            |            | X                   |              | <20y        | Acute Lymphoblastic Leukaemia                                     | OR= 1.24 [1.16, 1.33]                   |  |
| 124 |                           |               |              |               |             |              |                       |            |            | X                   |              | <20y        | Acute Myeloid Leukaemia                                           | OR= 1.40 [1.11, 1.76]                   |  |
| 122 |                           |               |              |               |             | X            |                       |            |            |                     |              | <38y        | Acute Lymphoblastic Leukaemia                                     | OR= 1.04 [0.97, 1.11]                   |  |

| Ref | Exposures (size at birth) |               |              |               |             |              |                        |            |            |                     | Population | Outcomes | Effect size<br>[confidence interval],<br>direction of association |                                          |
|-----|---------------------------|---------------|--------------|---------------|-------------|--------------|------------------------|------------|------------|---------------------|------------|----------|-------------------------------------------------------------------|------------------------------------------|
|     | Small                     |               |              |               |             | Cont         | Large                  |            |            |                     |            |          |                                                                   |                                          |
|     | EPT (<28wks)              | ELBW (<1000g) | VPT (<32wks) | VLBW (<1500g) | PT (<37wks) | LBW (<2500g) | SGA (<10th percentile) | BW (cont.) | GA (cont.) | Post Term (>42 wks) |            |          |                                                                   | HBW (>4000g)                             |
| 121 |                           |               |              | X             |             |              |                        |            |            |                     |            | <15y     | Acute Lymphoblastic Leukaemia                                     | OR= 1.04 [0.96, 1.13]                    |
| 121 |                           |               |              | X             |             |              |                        |            |            |                     |            | <5y      | Acute Lymphoblastic Leukaemia                                     | OR= 1.04 [0.93, 1.16]                    |
| 126 |                           |               |              |               |             | X            |                        |            |            |                     |            | 0-15y    | Acute Lymphoblastic Leukaemia                                     | OR= 0.83 [0.75, 0.92]                    |
| 126 |                           |               |              |               |             |              | X                      |            |            |                     |            | 0-15y    | Acute Lymphoblastic Leukaemia                                     | OR= 1.16 [1.09, 1.24] (per 1SD increase) |
| 126 |                           |               |              |               |             |              | X                      |            |            |                     |            | 0-1y     | Acute Lymphoblastic Leukaemia                                     | aOR= 1.09 [0.87, 1.37]                   |
| 126 |                           |               |              |               |             |              | X                      |            |            |                     |            | >1-5y    | Acute Lymphoblastic Leukaemia                                     | aOR= 1.17 [1.08, 1.27]                   |
| 126 |                           |               |              |               |             |              | X                      |            |            |                     |            | >5y      | Acute Lymphoblastic Leukaemia                                     | aOR= 1.18 [1.06, 1.31]                   |
| 123 |                           |               |              |               |             |              | X                      |            |            |                     |            | <15y     | Acute Lymphoblastic Leukaemia                                     | HR= 1.16 [0.81, 1.67]                    |
| 123 |                           |               |              |               |             |              | X                      |            |            |                     |            | <3y      | Acute Lymphoblastic Leukaemia                                     | HR= 1.23 [0.72, 2.11]                    |
| 123 |                           |               |              |               |             |              | X                      |            |            |                     |            | ≥3y      | Acute Lymphoblastic Leukaemia                                     | HR= 1.34 [0.78, 2.30]                    |
| 122 |                           |               |              |               |             |              |                        | X          |            |                     |            | <38y     | Acute Lymphoblastic Leukaemia                                     | OR= 1.03 [0.95, 1.12]                    |
| 122 |                           |               |              |               |             |              |                        | X          |            |                     |            | ≤9y      | Acute Lymphoblastic Leukaemia                                     | OR= 0.91 [0.78, 1.05]                    |
| 122 |                           |               |              |               |             |              |                        | X          |            |                     |            | 9-16y    | Acute Lymphoblastic Leukaemia                                     | OR= 1.03 [0.94, 1.13]                    |
| 123 |                           |               |              |               |             |              |                        |            | X          |                     |            | <15y     | Acute Lymphoblastic Leukaemia                                     | HR= 1.21 [0.74, 1.96]                    |
| 123 |                           |               |              |               |             |              |                        |            | X          |                     |            | <3y      | Acute Lymphoblastic Leukaemia                                     | HR= 1.02 [0.48, 2.15]                    |
| 123 |                           |               |              |               |             |              |                        |            | X          |                     |            | ≥3y      | Acute Lymphoblastic Leukaemia                                     | HR= 1.49 [0.77, 2.88]                    |
| 126 |                           |               |              |               |             |              |                        |            |            | X                   |            | 0-15y    | Acute Lymphoblastic Leukaemia                                     | OR= 1.24 [1.13, 1.36]                    |
| 126 |                           |               |              |               |             |              |                        |            |            | X                   |            | 0-1y     | Acute Lymphoblastic Leukaemia                                     | aOR= 1.04 [0.75, 1.44]                   |
| 126 |                           |               |              |               |             |              |                        |            |            | X                   |            | >1-5y    | Acute Lymphoblastic Leukaemia                                     | aOR= 1.20 [1.06, 1.35]                   |
| 126 |                           |               |              |               |             |              |                        |            |            | X                   |            | >5y      | Acute Lymphoblastic Leukaemia                                     | aOR= 1.26 [1.08, 1.46]                   |
| 122 |                           |               |              | X             |             |              |                        |            |            |                     |            | <38y     | Acute Myeloid Leukaemia                                           | OR= 1.20 [1.00, 1.44]                    |
| 127 |                           |               |              | X             |             |              |                        |            |            |                     |            | <1y      | Acute Myeloid Leukaemia                                           | OR= 0.92 [0.60, 1.41]                    |
| 127 |                           |               |              | X             |             |              |                        |            |            |                     |            | 1-14y    | Acute Myeloid Leukaemia                                           | OR= 0.98 [0.81, 1.19]                    |
| 121 |                           |               |              | X             |             |              |                        |            |            |                     |            | <15y     | Acute Myeloid Leukaemia                                           | OR= 1.42 [1.21, 1.67]                    |
| 121 |                           |               |              | X             |             |              |                        |            |            |                     |            | <5y      | Acute Myeloid Leukaemia                                           | OR= 1.35 [1.07, 1.70]                    |
| 127 |                           |               |              |               | X           |              |                        |            |            |                     |            | <1y      | Acute Myeloid Leukaemia                                           | OR= 1.51 [1.04, 2.19]                    |
| 127 |                           |               |              |               | X           |              |                        |            |            |                     |            | 1-14y    | Acute Myeloid Leukaemia                                           | OR= 1.13 [0.99, 1.29]                    |
| 122 |                           |               |              |               |             |              |                        | X          |            |                     |            | <38y     | Acute Myeloid Leukaemia                                           | OR= 1.20 [1.00, 1.43]                    |
| 127 |                           |               |              |               |             |              |                        |            | X          |                     |            | <1y      | Acute Myeloid Leukaemia                                           | OR= 0.96 [0.68, 1.35]                    |
| 127 |                           |               |              |               |             |              |                        |            | X          |                     |            | 1-14y    | Acute Myeloid Leukaemia                                           | OR= 1.31 [0.99, 1.29]                    |
| 125 |                           |               |              |               |             |              |                        |            |            | X                   |            | 0-29y    | Acute Myeloid Leukaemia                                           | OR= 1.27 [0.73, 2.20]                    |
|     |                           |               |              |               |             |              |                        |            |            |                     |            |          | <b>Lymphoma</b>                                                   |                                          |
| 128 |                           |               |              |               | X           |              |                        |            |            |                     |            | 0-17y    | Lymphoma                                                          | OR= 1.03 [0.79, 1.33]                    |
| 128 |                           |               |              |               | ◊           |              |                        |            |            |                     |            | 0-17y    | Lymphoma                                                          | OR= 1.02 [0.79, 1.33]                    |
| 128 |                           |               |              |               |             |              |                        | X          |            |                     |            | 0-17y    | Lymphoma                                                          | OR= 0.95 [0.79, 1.14]                    |
| 128 |                           |               |              |               |             |              |                        |            | ◊          |                     |            | 0-17y    | Lymphoma                                                          | OR= 1.09 [0.76, 1.56]                    |
| 128 |                           |               |              |               | X           |              |                        |            |            |                     |            | 0-17y    | Non-Hodgkin Lymphoma                                              | OR= 1.03 [0.70, 1.51]                    |
| 128 |                           |               |              |               | ◊           |              |                        |            |            |                     |            | 0-17y    | Non-Hodgkin Lymphoma                                              | OR= 1.07 [0.71, 1.62]                    |
| 128 |                           |               |              |               |             |              |                        | X          |            |                     |            | 0-17y    | Non-Hodgkin Lymphoma                                              | OR= 1.18 [0.84, 1.67]                    |
| 128 |                           |               |              |               |             |              |                        |            | ◊          |                     |            | <18y     | Non-Hodgkin Lymphoma                                              | OR= 1.17 [0.76, 1.80]                    |
| 128 |                           |               |              |               | X           |              |                        |            |            |                     |            | 0-17y    | Hodgkin Lymphoma                                                  | OR= 0.94 [0.54, 1.64]                    |
| 128 |                           |               |              |               | ◊           |              |                        |            |            |                     |            | 0-17y    | Hodgkin Lymphoma                                                  | OR= 0.94 [0.54, 1.65]                    |
| 128 |                           |               |              |               |             |              |                        |            | X          |                     |            | 0-17y    | Hodgkin Lymphoma                                                  | OR= 0.92 [0.66, 1.24]                    |
| 128 |                           |               |              |               |             |              |                        |            |            | ◊                   |            | <18y     | Hodgkin Lymphoma                                                  | OR= 0.94 [0.64, 1.38]                    |
|     |                           |               |              |               |             |              |                        |            |            |                     |            |          | <b>Wilm's Tumour (Nephroblastoma)</b>                             |                                          |
| 129 |                           |               |              | X             |             |              |                        |            |            |                     |            | 0-15y    | Wilms' Tumour                                                     | OR= 1.42 [1.14, 1.79]                    |
| 129 |                           |               |              |               | ◊           |              |                        |            |            |                     |            | 0-15y    | Wilms' Tumour                                                     | OR= 0.90 [0.67, 1.22]                    |
| 129 |                           |               |              |               |             |              |                        |            | X          |                     |            | 0-15y    | Wilms' Tumour                                                     | OR= 1.36 [1.12, 1.65]                    |
| 129 |                           |               |              |               |             |              |                        |            | X          |                     |            | <24m     | Wilms' Tumour                                                     | OR= 1.27 [0.97, 1.65]                    |
| 129 |                           |               |              |               |             |              |                        |            | X          |                     |            | 24m-15y  | Wilms' Tumour                                                     | OR= 1.66 [1.28, 2.16]                    |
| 112 |                           |               |              |               |             |              |                        |            | X          |                     |            | Children | Wilms' Tumour                                                     | aOR= 1.68 [1.38, 2.06]                   |
| 129 |                           |               |              |               |             |              |                        |            |            | X                   |            | 0-15y    | Wilms' Tumour                                                     | OR= 1.51 [1.25, 1.83]                    |
| 112 |                           |               |              |               |             |              |                        |            |            | X                   |            | Children | Wilms' Tumour                                                     | aOR= 1.77 [1.31, 2.39]                   |
|     |                           |               |              |               |             |              |                        |            |            |                     |            |          | <b>Other tumours</b>                                              |                                          |
| 130 |                           |               |              |               | ◊           |              |                        |            |            |                     |            | 1-59y    | Testicular Cancer                                                 | OR= 1.18 [1.01, 1.38]                    |
| 130 |                           |               |              |               | ◊           |              |                        |            |            |                     |            | 1-55y    | Testicular Cancer: Seminoma and Non-seminoma                      | OR= 1.18 [0.98, 1.41]                    |
| 130 |                           |               |              |               | ◊           |              |                        |            |            |                     |            | 1-55y    | Seminoma                                                          | OR= 1.44 [1.11, 1.88]                    |
| 130 |                           |               |              |               | ◊           |              |                        |            |            |                     |            | 1-55y    | Non-seminoma                                                      | OR= 0.98 [0.81, 1.17]                    |
| 130 |                           |               |              |               |             |              |                        |            |            | ◊                   |            | 1-59y    | Testicular Cancer                                                 | OR= 1.12 [1.02, 1.22]                    |

| Ref | Exposures (size at birth) |               |              |               |             |              |                       |            |            |                     | Population   | Outcomes    | Effect size<br>[confidence interval],<br>direction of association |                                              |  |
|-----|---------------------------|---------------|--------------|---------------|-------------|--------------|-----------------------|------------|------------|---------------------|--------------|-------------|-------------------------------------------------------------------|----------------------------------------------|--|
|     | Small                     |               |              |               |             | Cont         | Large                 |            |            |                     |              |             |                                                                   |                                              |  |
|     | EPT (<28wks)              | ELBW (<1000g) | VPT (<32wks) | VLBW (<1500g) | PT (<37wks) | LBW (<2500g) | SGA(<10th percentile) | BW (cont.) | GA (cont.) | Post Term (>42 wks) | HBW (>4000g) | LGA (>90th) |                                                                   |                                              |  |
| 130 |                           |               |              |               |             |              |                       |            |            |                     | ◇            | 1-55y       | Testicular Cancer: Seminoma and Non-seminoma                      | OR= 1.05 [0.95, 1.15]                        |  |
| 130 |                           |               |              |               |             |              |                       |            |            |                     | ◇            | 1-55y       | Seminoma                                                          | OR= 1.04 [0.89, 1.22]                        |  |
| 130 |                           |               |              |               |             |              |                       |            |            |                     | ◇            | 1-55y       | Non-seminoma                                                      | OR= 1.05 [0.93, 1.19]                        |  |
| 123 |                           |               |              |               |             |              |                       | X          |            |                     |              | <15y        | Non-Leukaemia                                                     | HR= 1.04 [0.83,1.28] per kg increase         |  |
| 123 |                           |               |              |               |             |              |                       | X          |            |                     |              | <3y         | Non-Leukaemia                                                     | HR= 0.99 [0.71,1.38] per kg increase         |  |
| 123 |                           |               |              |               |             |              |                       | X          |            |                     |              | ≥3y         | Non-Leukaemia                                                     | HR= 1.39 [1.02,1.91] per kg increase         |  |
| 123 |                           |               |              |               |             |              |                       |            |            | X                   |              | <15y        | Non-Leukaemia                                                     | HR= 1.09 [0.79, 1.50]                        |  |
| 123 |                           |               |              |               |             |              |                       |            |            | X                   |              | <3y         | Non-Leukaemia                                                     | HR= 0.75 [0.45,1.24]                         |  |
| 123 |                           |               |              |               |             |              |                       |            |            | X                   |              | ≥3y         | Non-Leukaemia                                                     | HR= 1.62 [1.06, 2.46]                        |  |
| 131 |                           |               |              |               |             |              | X                     |            |            |                     |              | <45y        | Bone Tumour                                                       | OR= 1.01 [1.00, 1.02] (per 500g increase)    |  |
| 131 |                           |               |              |               |             |              |                       |            |            | X                   |              | <45y        | Bone Tumour                                                       | OR= 1.13 [0.96, 1.33]                        |  |
| 131 |                           |               |              |               |             |              |                       |            |            | X                   |              | <18y        | Bone Tumour                                                       | OR= 1.17 [0.96, 1.42]                        |  |
| 131 |                           |               |              |               |             |              |                       |            |            | X                   |              | <18y        | Osteosarcoma                                                      | OR= 1.25 [0.91, 1.72]                        |  |
| 131 |                           |               |              |               |             |              |                       |            |            | X                   |              | <18y        | Ewing Sarcoma                                                     | OR= 0.81 [0.54, 1.21]                        |  |
| 131 |                           |               |              |               |             |              |                       |            |            | X                   |              | <18y        | Chondrosarcoma                                                    | OR= 1.39 [0.55, 3.54]                        |  |
| 123 |                           |               |              |               |             |              | X                     |            |            |                     |              | <15y        | Cancer                                                            | aHR= 1.26 [1.02, 1.54] per kg increase       |  |
| 123 |                           |               |              |               |             |              | X                     |            |            |                     |              | <15y        | Cancer                                                            | HR= 1.10 [0.91, 1.31] per kg increase        |  |
| 123 |                           |               |              |               |             |              | X                     |            |            |                     |              | <3y         | Cancer                                                            | HR= 1.08 [0.82,1.42] per kg increase         |  |
| 123 |                           |               |              |               |             |              | X                     |            |            |                     |              | ≥3y         | Cancer                                                            | HR= 1.44 [1.11,1.88] per kg increase         |  |
| 123 |                           |               |              |               |             |              |                       |            |            | X                   |              | <15y        | Cancer                                                            | HR= 1.14 [0.88, 1.48]                        |  |
| 123 |                           |               |              |               |             |              |                       |            |            | X                   |              | <3y         | Cancer                                                            | HR= 0.84 [0.56, 1.27]                        |  |
| 123 |                           |               |              |               |             |              |                       |            |            | X                   |              | ≥3y         | Cancer                                                            | HR= 1.60 [1.13, 2.26]                        |  |
|     |                           |               |              |               |             |              |                       |            |            |                     |              |             | <b>Metabolic Syndrome</b>                                         |                                              |  |
| 132 |                           |               | X            |               |             |              |                       |            |            |                     |              | 9-29y       | Metabolic Syndrome (overweight, insulin resistance)               | OR= 1.48 [1.00, 2.21]                        |  |
| 132 |                           |               |              | X             |             |              |                       |            |            |                     |              | 7-74y       | Metabolic Syndrome (overweight, insulin resistance)               | OR= 1.37 [1.17, 1.61]                        |  |
|     |                           |               |              |               |             |              |                       |            |            |                     |              |             | <b>Metabolic Biomarkers</b>                                       |                                              |  |
| 99  |                           |               |              |               |             |              | X                     |            |            |                     |              | 16-75y      | Amino acid: Alanine (µmol/L)                                      | aβ= 5.26 [3.14, 7.38] per kg lower           |  |
| 99  |                           |               |              |               |             |              | X                     |            |            |                     |              | 16-75y      | Ketone bodies: Acetoacetate (µmol/L)                              | aβ= 0.0177 [-0.00279, 0.0381] per kg lower   |  |
| 99  |                           |               |              |               |             |              | X                     |            |            |                     |              | 16-75y      | Miscellaneous: Albumin                                            | aβ= 0.219 cu [-0.0485, 0.487] per kg lower   |  |
| 99  |                           |               |              |               |             |              | X                     |            |            |                     |              | 16-75y      | Liver function markers: Alanine aminotransferase (cu)             | aβ= 0.00282 [0.000213, 0.00542] per kg lower |  |
| 99  |                           |               |              |               |             |              | X                     |            |            |                     |              | 16-75y      | Inflammatory markers: C-reactive protein (mg/L)                   | aβ= 0.0518 [0.00349, 0.1] per kg lower       |  |
| 99  |                           |               |              |               |             |              |                       |            |            |                     |              |             | Additional data on paper 99 in appendix                           | Additional data on paper 99 in appendix      |  |

(94) IUGR is defined as BW<10th percentile or BW<5th percentile or BW<3rd percentile (or -2 standard deviations); or the combination of BW and length <-2 standard deviations; or BW<2500g and <-2 standard deviations; or BW<1500g and <-2 standard deviations; or ELBW with BW<10th percentile; or BW<10th percentile and BW ratio<0.85; or BW<-2 standard deviations and estimated fetal weight<-15%; or BW ratio<0.8; or estimated fetal weight<10th percentile or abdominal circumference<5th percentile and placental insufficiency>2SD; or VLBW with BW<-2 standard deviations

(102) IUGR is defined based on fetal biometry or Doppler velocimetry

Table 1.e- Associations between size-at-birth and behavioural and mental health outcomes.

| Ref                                  | Exposures (size at birth) |               |              |               |             |              |                       |            |            |                     | Population | Outcomes   | Effect size<br>[confidence interval],<br>direction of association |                                 |
|--------------------------------------|---------------------------|---------------|--------------|---------------|-------------|--------------|-----------------------|------------|------------|---------------------|------------|------------|-------------------------------------------------------------------|---------------------------------|
|                                      | Small                     |               |              |               |             | Cont         | Large                 |            |            |                     |            |            |                                                                   |                                 |
|                                      | EPT (<28wks)              | ELBW (<1000g) | VPT (<32wks) | VLBW (<1500g) | PT (<37wks) | LBW (<2500g) | SCA(<10th percentile) | BW (cont.) | GA (cont.) | Post Term (>42 wks) |            |            |                                                                   | HBW (>4000g)                    |
| <b>Depressive/ Anxiety Disorders</b> |                           |               |              |               |             |              |                       |            |            |                     |            |            |                                                                   |                                 |
| 133                                  |                           | X             | X            |               |             |              |                       |            |            |                     |            | 11-20y     | Anxiety                                                           | OR= 2.27 [1.15, 4.47]           |
| 134                                  |                           |               |              | X             | X           |              |                       |            |            |                     |            | 3-19y      | Clinically Unspecified Anxiety                                    | OR= 2.17 [1.43, 3.29]           |
| 134                                  |                           |               |              | X             | X           |              |                       |            |            |                     |            | 5-18y      | Generalized Anxiety Disorder                                      | OR= 2.20 [1.26, 3.84]           |
| 134                                  |                           |               |              | X             | X           |              |                       |            |            |                     |            | 5-11y      | Separation Anxiety Disorder                                       | OR= 1.56 [0.90, 2.71]           |
| 134                                  |                           |               |              | X             | X           |              |                       |            |            |                     |            | 7-14y      | Clinically Unspecified Depression                                 | OR= 1.55 [0.45, 5.33]           |
| 134                                  |                           |               |              | X             | X           |              |                       |            |            |                     |            | 9.7-18y    | Major Depressive Disorder                                         | OR= 1.14 [0.71, 1.82]           |
| 135                                  |                           |               |              | X             | X           |              |                       |            |            |                     |            | 11-25y     | Anxiety and Depressive Disorder Diagnosis                         | OR= 2.92 [1.82, 4.67]           |
| 136                                  |                           |               |              | X             |             |              |                       |            |            |                     |            | 7-31y      | Depression                                                        | OR= 1.38 [1.00, 1.90]           |
| 137                                  |                           |               |              |               | X           |              |                       |            |            |                     |            | 11-68y     | Depression                                                        | OR= 1.15 [1.00, 1.32]           |
| 136                                  |                           |               |              |               | X           |              |                       |            |            |                     |            | 6-45y      | Depression                                                        | OR= 1.44 [1.17, 1.76]           |
| 136                                  |                           |               |              |               |             |              |                       | X          |            |                     |            | 11-33y     | Depression                                                        | OR= 1.46 [1.11, 1.94]           |
| 138                                  |                           | △             | X            |               |             |              |                       |            |            |                     |            | 7-17.8y    | Anxiety or Depression: Child Behaviour Checklist                  | Cohen's d= -0.20 [-0.48, 0.08]  |
| 138                                  |                           | △             | X            |               |             |              |                       |            |            |                     |            | 7-11.6y    | Anxiety or Depression: Teachers Report Form                       | Cohen's d= -0.28 [-0.45, -0.12] |
| <b>Other Psychological</b>           |                           |               |              |               |             |              |                       |            |            |                     |            |            |                                                                   |                                 |
| 134                                  |                           |               |              | X             | X           |              |                       |            |            |                     |            | 5-18y      | Specific Phobia                                                   | OR= 1.93 [1.05, 3.52]           |
| 134                                  |                           |               |              | X             | X           |              |                       |            |            |                     |            | 5-18y      | Social Phobia                                                     | OR= 2.63 [0.87, 7.95]           |
| 135                                  |                           |               |              | X             | X           |              |                       |            |            |                     |            | 11-25y     | Any Psychiatric Diagnosis                                         | OR= 3.66 [2.57, 5.21]           |
| 139                                  |                           |               |              | X             |             |              |                       |            |            |                     |            | 1-60m      | Negative Affect                                                   | Cohen's d= -0.17 [-0.42, 0.08]  |
| 139                                  |                           |               |              | X             |             |              |                       |            |            |                     |            | 1-60m      | Falling Reactivity                                                | Cohen's d= -0.92 [-2.59, 0.75]  |
| 139                                  |                           |               |              | X             |             |              |                       |            |            |                     |            | 1-60m      | Fear                                                              | Cohen's d= 0.14 [-0.05, 0.33]   |
| 139                                  |                           |               |              | X             |             |              |                       |            |            |                     |            | 1-60m      | Frustration/Distress to Limitations                               | Cohen's d= -0.03 [-0.25, 0.20]  |
| 139                                  |                           |               |              | X             |             |              |                       |            |            |                     |            | 1-60m      | Sadness                                                           | Cohen's d= 0.10 [-0.07, 0.28]   |
| 139                                  |                           |               |              | X             |             |              |                       |            |            |                     |            | 1-60m      | Discomfort                                                        | Cohen's d= -0.07 [-0.54, 0.51]  |
| 139                                  |                           |               |              | X             |             |              |                       |            |            |                     |            | 1-60m      | Perceptual Sensitivity                                            | Cohen's d= -0.05 [-0.29, 0.19]  |
| 139                                  |                           |               |              | X             |             |              |                       |            |            |                     |            | 1-60m      | Shyness                                                           | Cohen's d= 0.06 [-0.18, 0.30]   |
| 139                                  |                           |               |              | X             |             |              |                       |            |            |                     |            | 3-60m      | Surgency: Activity level                                          | Cohen's d= -0.20 [-0.38, -0.02] |
| 139                                  |                           |               |              | X             |             |              |                       |            |            |                     |            | 1-60m      | Surgency: High-intensity Pleasure                                 | Cohen's d= -0.28 [-0.72, 0.16]  |
| 139                                  |                           |               |              | X             |             |              |                       |            |            |                     |            | 1-60m      | Surgency: Impulsivity                                             | dCohen's d= -0.04 [-0.28, 0.20] |
| 139                                  |                           |               |              | X             |             |              |                       |            |            |                     |            | 1-60m      | Surgency: Vocal Reactivity                                        | Cohen's d= -0.58 [-1.62, 0.46]  |
| 139                                  |                           |               |              | X             |             |              |                       |            |            |                     |            | 1-60m      | Surgency: Smiling and Laughter                                    | Cohen's d= -0.09 [-0.27, 0.09]  |
| 139                                  |                           |               |              | X             |             |              |                       |            |            |                     |            | 1-60m      | Surgency: Approach                                                | Cohen's d= -0.09 [-0.27, 0.09]  |
| 139                                  |                           |               |              | X             |             |              |                       |            |            |                     |            | 1-60m      | Effortful Control                                                 | Cohen's d= 0.26 [0.007, 0.52]   |
| 139                                  |                           |               |              | X             |             |              |                       |            |            |                     |            | 1-60m      | Cuddliness                                                        | Cohen's d= 0.13 [-0.38, 0.65]   |
| 139                                  |                           |               |              | X             |             |              |                       |            |            |                     |            | 1-60m      | Duration of Orientation                                           | Cohen's d= -0.18 [-0.56, 0.20]  |
| 139                                  |                           |               |              | X             |             |              |                       |            |            |                     |            | 1-60m      | Low-intensity Pleasure                                            | Cohen's d= -0.15 [-0.33, -0.03] |
| 139                                  |                           |               |              | X             |             |              |                       |            |            |                     |            | 1-60m      | Soothability                                                      | Cohen's d= -0.13 [-0.40, 0.14]  |
| <b>Behavioural</b>                   |                           |               |              |               |             |              |                       |            |            |                     |            |            |                                                                   |                                 |
| 140                                  | X                         |               |              |               |             |              |                       |            |            |                     |            | 6-12y      | Internalizing: Parent-Reported                                    | SMD= 0.42 [0.26, 0.58]          |
| 140                                  | X                         |               |              |               |             |              |                       |            |            |                     |            | 6-12y      | Internalizing: Teacher-Reported                                   | SMD= 0.32 [0.12, 0.52]          |
| 140                                  | X                         |               |              |               |             |              |                       |            |            |                     |            | 15.6-19.7y | Internalizing: Parent-Reported                                    | SMD= 0.51 [0.26, 0.76]          |
| 140                                  | X                         |               |              |               |             |              |                       |            |            |                     |            | 15.6-18.4y | Internalizing: Self-Reported                                      | SMD= 0.31 [-0.44, 1.06]         |
| 140                                  | X                         |               |              |               |             |              |                       |            |            |                     |            | 5-36y      | Externalizing: Parent-Reported                                    | SMD= 0.15 [0.02, 0.28]          |
| 140                                  | X                         |               |              |               |             |              |                       |            |            |                     |            | 16.3-19.7y | Externalizing: Parent-Reported                                    | SMD= 0.29 [-0.26, 0.84]         |
| 140                                  | X                         |               |              |               |             |              |                       |            |            |                     |            | 5-36y      | Externalizing: Teacher-Reported                                   | SMD= 0.14 [0.00, 0.29]          |
| 140                                  | X                         |               |              |               |             |              |                       |            |            |                     |            | 5-36y      | Oppositional Defiant Disorder: Parent-Reported                    | SMD= 0.14 [-0.01, 0.28]         |
| 140                                  | X                         |               |              |               |             |              |                       |            |            |                     |            | 5-36y      | Oppositional Defiant Disorder: Teacher-Reported                   | SMD= 0.79 [0.40, 1.17]          |
| 140                                  | X                         |               |              |               |             |              |                       |            |            |                     |            | 14.1-14.7y | Oppositional Defiant Disorder: Parent-Reported                    | SMD= -0.03 [-0.21, 0.14]        |
| 140                                  | X                         |               |              |               |             |              |                       |            |            |                     |            | 14.1-14.7y | Oppositional Defiant Disorder: Self-Reported                      | SMD= -0.34 [-0.54, -0.13]       |
| 140                                  | X                         |               |              |               |             |              |                       |            |            |                     |            | 5-10y      | Social Problems: Parent-Reported                                  | SMD= 0.46 [0.31, 0.61]          |
| 140                                  | X                         |               |              |               |             |              |                       |            |            |                     |            | 15.6-19.7y | Social Problems: Parent-Reported                                  | SMD= 0.52 [0.00, 1.03]          |
| 140                                  | X                         |               |              |               |             |              |                       |            |            |                     |            | 15.6-18.4y | Social Problems: Self-Reported                                    | SMD= 0.21 [-0.16, 0.57]         |
| 140                                  | X                         |               |              |               |             |              |                       |            |            |                     |            | 6-12y      | Conduct Disorder: Parent-Reported                                 | SMD= 0.23 [0.09, 0.37]          |
| 140                                  | X                         |               |              |               |             |              |                       |            |            |                     |            | 6-12y      | Conduct Disorder: Teacher-Reported                                | SMD= 0.19 [-0.01, 0.38]         |
| 140                                  | X                         |               |              |               |             |              |                       |            |            |                     |            | 14.1-19.7y | Conduct Disorder: Parent-Reported                                 | SMD= -0.30 [-1.58, 0.98]        |



| Ref | Exposures (size at birth) |               |              |               |             |              |                        |            |            |                     | Population   | Outcomes               | Effect size<br>[confidence interval],<br>direction of association |                                                              |                                         |
|-----|---------------------------|---------------|--------------|---------------|-------------|--------------|------------------------|------------|------------|---------------------|--------------|------------------------|-------------------------------------------------------------------|--------------------------------------------------------------|-----------------------------------------|
|     | Small                     |               |              |               |             | Cont         | Large                  |            |            |                     |              |                        |                                                                   |                                                              |                                         |
|     | EPT (<28wks)              | ELBW (<1000g) | VPT (<32wks) | VLBW (<1500g) | PT (<37wks) | LBW (<2500g) | SGA (<10th percentile) | BW (cont.) | GA (cont.) | Post Term (>42 wks) | HBW (>4000g) | LGA (>90th percentile) |                                                                   |                                                              |                                         |
| 140 | X                         |               |              |               |             |              |                        |            |            |                     |              |                        | 14.1-18.4y                                                        | Conduct Disorder: Self-Reported                              | SMD= -0.17 [-0.38, 0.05]                |
| 138 |                           | △             | X            |               |             |              |                        |            |            |                     |              |                        | 7-17.8y                                                           | Externalizing Behavioural Problem: Child Behaviour Checklist | Cohen's d= -0.09 [-0.05, 0.22]          |
| 138 |                           | △             | X            |               |             |              |                        |            |            |                     |              |                        | 7-11.6y                                                           | Externalizing Behavioural Problem: Teachers Report Form      | Cohen's d= -0.08 [-0.24, 0.07]          |
| 139 |                           |               |              |               | X           |              |                        |            |            |                     |              |                        | 1-60m                                                             | Adaptability (Behaviour)                                     | Cohen's d= -0.08 [-0.68, 0.51]          |
| 139 |                           |               |              |               | X           |              |                        |            |            |                     |              |                        | 1-60m                                                             | Approach (Behaviour)                                         | Cohen's d= -0.07 [-0.27, 0.13]          |
| 139 |                           |               |              |               | X           |              |                        |            |            |                     |              |                        | 1-60m                                                             | Difficult (category) (Behaviour)                             | OR= 0.78 [0.41, 1.50]                   |
| 139 |                           |               |              |               | X           |              |                        |            |            |                     |              |                        | 1-60m                                                             | Difficult (mean) (Behaviour)                                 | Cohen's d= -0.02 [-0.15, 0.10]          |
| 139 |                           |               |              |               | X           |              |                        |            |            |                     |              |                        | 1-60m                                                             | Easy (category) (Behaviour)                                  | OR= 1.67 [0.90, 3.01]                   |
| 139 |                           |               |              |               | X           |              |                        |            |            |                     |              |                        | 1-60m                                                             | Intensity (Behaviour)                                        | Cohen's d= 0.25 [-0.46, 0.96]           |
| 139 |                           |               |              |               | X           |              |                        |            |            |                     |              |                        | 1-60m                                                             | Negativity (Behaviour)                                       | Cohen's d= -0.16 [-0.68, 0.36]          |
| 139 |                           |               |              |               | X           |              |                        |            |            |                     |              |                        | 1-60m                                                             | Persistence (Behaviour)                                      | Cohen's d= 0.15 [-0.11, 0.41]           |
| 139 |                           |               |              |               | X           |              |                        |            |            |                     |              |                        | 1-60m                                                             | Rhythmicity (Behaviour)                                      | Cohen's d= -0.12 [-0.38, 0.13]          |
| 139 |                           |               |              |               | X           |              |                        |            |            |                     |              |                        | 1-60m                                                             | Social Orientation (Behaviour)                               | Cohen's d= 0.09 [-0.16, 0.34]           |
| 139 |                           |               |              |               | X           |              |                        |            |            |                     |              |                        | 1-60m                                                             | Threshold (Behaviour)                                        | Cohen's d= -0.19 [-0.75, 0.38]          |
| 139 |                           |               |              |               | X           |              |                        |            |            |                     |              |                        | 1-60m                                                             | Unadaptable (Behaviour)                                      | Cohen's d= -0.22 [-0.63, 0.20]          |
| 139 |                           |               |              |               | X           |              |                        |            |            |                     |              |                        | 1-60m                                                             | Unpredictable (Behaviour)                                    | Cohen's d= -0.004 [-0.15, 0.14]         |
| 139 |                           |               |              |               | X           |              |                        |            |            |                     |              |                        | 1-60m                                                             | Mood (Behaviour)                                             | Cohen's d= -0.12 [-1.26, 1.03]          |
| 139 |                           |               |              |               | X           |              |                        |            |            |                     |              |                        | 1-60m                                                             | Positive emotions (Behaviour)                                | Cohen's d= -0.16 [-0.61, 0.29]          |
| 139 |                           |               |              |               | X           |              |                        |            |            |                     |              |                        | 1-60m                                                             | Activity (Behaviour)                                         | Cohen's d= 0.26 [-0.06, 0.59]           |
| 141 |                           |               |              |               | X           |              |                        |            |            |                     |              |                        | 2-18y                                                             | Behaviour Test Score                                         | SMD= -0.32 [-0.41, -0.24]               |
| 141 |                           |               |              |               | X           |              |                        |            |            |                     |              |                        | 4-11y                                                             | Behaviour Test Score                                         | SMD= -0.34 [-0.45, -0.23]               |
| 141 |                           |               |              |               | X           |              |                        |            |            |                     |              |                        | 11-18y                                                            | Behaviour Test Score                                         | SMD= -0.72 [-0.97, -0.47]               |
| 142 |                           |               |              |               |             | X            |                        |            |            |                     |              |                        | 5-14y                                                             | Behavioural Problems                                         | SMD= 0.31 [0.13, 0.48]                  |
|     |                           |               |              |               |             |              |                        |            |            |                     |              |                        |                                                                   | <b>Physical Activity</b>                                     |                                         |
| 143 |                           |               |              | X             |             |              |                        |            |            |                     |              |                        | 5.8-19y                                                           | Exercise Capacity VO <sub>2</sub> max (mL/kg/min)            | SMD= -0.33 [-0.58, -0.09]               |
| 144 |                           |               |              |               | X           |              |                        |            |            |                     |              |                        | 14-69y                                                            | Leisure Time Physical Activity                               | OR= 0.72 [0.59, 0.88]                   |
| 144 |                           |               |              |               |             |              |                        |            |            |                     |              |                        | 14-69y                                                            | Leisure Time Physical Activity                               | OR= 0.92 [0.81, 1.03]                   |
| 144 |                           |               |              |               |             |              |                        |            |            |                     |              |                        | 14-69y                                                            | Leisure Time Physical Activity                               | OR= 0.65 [0.50, 0.86]                   |
| 145 |                           |               |              |               |             |              | X                      |            |            |                     |              |                        | 0-18y                                                             | Physical Activity (counts per minute)                        | β= -3.08 [-10.20, 4.04] per kg increase |
|     |                           |               |              |               |             |              |                        |            |            |                     |              |                        |                                                                   | <b>Attention</b>                                             |                                         |
| 146 |                           | X             | X            |               |             |              |                        |            |            |                     |              |                        | 4-5y                                                              | Selective Visual Attention (per correct answer)              | Cohen's d= -0.36 [-0.53, -0.19]         |
| 138 |                           | △             | X            |               |             |              |                        |            |            |                     |              |                        | 7-17.8y                                                           | Attention Problems using Child Behaviour Checklist           | Cohen's d= -0.59 [-0.74, -0.44]         |
| 138 |                           | △             | X            |               |             |              |                        |            |            |                     |              |                        | 7-11.6y                                                           | Attention Problems using Teachers Report Form                | Cohen's d= -0.43 [-0.61, -0.25]         |
| 147 |                           |               |              |               | X           |              |                        |            |            |                     |              |                        | 0-14m                                                             | Latency to Fixate                                            | Cohen's d= -0.18 [-0.33, -0.02]         |
| 147 |                           |               |              |               | X           |              |                        |            |            |                     |              |                        | 0-14m                                                             | Habituation                                                  | Cohen's d= -0.10 [-0.22, 0.03]          |
| 147 |                           |               |              |               | X           |              |                        |            |            |                     |              |                        | 0-14m                                                             | Novelty Preference                                           | Cohen's d= -0.20 [-0.32, -0.08]         |
| 147 |                           |               |              |               | X           |              |                        |            |            |                     |              |                        | 6-24m                                                             | Focused Attention                                            | Cohen's d= -0.28 [-0.45, -0.11]         |
| 139 |                           |               |              |               | X           |              |                        |            |            |                     |              |                        | 10-60m                                                            | Attention Span (Behaviour)                                   | Cohen's d= 0.26 [0.005, 0.51]           |
| 139 |                           |               |              |               | X           |              |                        |            |            |                     |              |                        | 28-60m                                                            | Attentional Focusing (Psychological)                         | Cohen's d= 0.48 [0.24, 0.73]            |
| 139 |                           |               |              |               | X           |              |                        |            |            |                     |              |                        | 1-60m                                                             | Attentional Shifting (Psychological)                         | Cohen's d= -0.22 [-0.46, -0.02]         |
| 148 |                           |               |              |               | X           |              |                        |            |            |                     |              |                        | 2-17y                                                             | Selective Attention                                          | Cohen's d= 0.38 [0.21, 0.54]            |
| 148 | 26                        |               |              |               |             |              |                        |            |            |                     |              |                        | 2-17y                                                             | Selective Attention                                          | Cohen's d= 0.58 [0.43, 0.74]            |
| 148 |                           |               |              |               | X           |              |                        |            |            |                     |              |                        | 2-17y                                                             | Sustained Attention                                          | Cohen's d= 0.45 [0.23, 0.66]            |
| 148 | 26                        |               |              |               |             |              |                        |            |            |                     |              |                        | 2-17y                                                             | Sustained Attention                                          | Cohen's d= 0.67 [0.31, 1.03]            |
|     |                           |               |              |               |             |              |                        |            |            |                     |              |                        |                                                                   | <b>Attention-Deficit/Hyperactivity Disorder (ADHD)</b>       |                                         |
| 141 | X                         |               |              |               |             |              |                        |            |            |                     |              |                        | 6-11y                                                             | ADHD                                                         | OR= 3.3 [2.0, 5.6]                      |
| 149 | X                         |               |              |               |             |              |                        |            |            |                     |              |                        | 3-22.5y                                                           | ADHD                                                         | R= -0.15 [-0.43, 0.13]                  |
| 140 |                           | X             |              |               |             |              |                        |            |            |                     |              |                        | 6-12y                                                             | Combined ADHD: Teacher-Reported                              | SMD= 0.54 [0.29, 0.79]                  |
| 140 |                           | X             |              |               |             |              |                        |            |            |                     |              |                        | 6-12y                                                             | Inattentive ADHD: Teacher-Reported                           | SMD= 0.54 [0.27, 0.82]                  |
| 140 |                           | X             |              |               |             |              |                        |            |            |                     |              |                        | 6-12y                                                             | Hyperactive ADHD: Teacher-Reported                           | SMD= 0.35 [0.19, 0.50]                  |
| 140 |                           | X             |              |               |             |              |                        |            |            |                     |              |                        | 6-12y                                                             | Combined ADHD: Parent-Reported                               | SMD= 0.68 [0.56, 0.80]                  |
| 140 |                           | X             |              |               |             |              |                        |            |            |                     |              |                        | 6-12y                                                             | Inattentive ADHD: Parent-Reported                            | SMD= 0.58 [0.39, 0.77]                  |
| 140 |                           | X             |              |               |             |              |                        |            |            |                     |              |                        | 6-12y                                                             | Hyperactive ADHD: Parent-Reported                            | SMD= 0.46 [0.37, 0.55]                  |
| 140 |                           | X             |              |               |             |              |                        |            |            |                     |              |                        | 14.1-18.4y                                                        | ADHD: Self-Reported                                          | SMD= -0.03 [-0.28, 0.23]                |
| 140 |                           | X             |              |               |             |              |                        |            |            |                     |              |                        | 14.1-19.7y                                                        | Combined ADHD: Parent-Reported                               | SMD= 0.52 [0.19, 0.85]                  |
| 140 |                           | X             |              |               |             |              |                        |            |            |                     |              |                        | 14.7-17.4y                                                        | Inattentive ADHD: Parent-Reported                            | SMD= 0.40 [0.24, 0.56]                  |
| 140 |                           | X             |              |               |             |              |                        |            |            |                     |              |                        | 14.7-17.4y                                                        | Hyperactive ADHD: Parent-Reported                            | SMD= 0.26 [0.10, 0.43]                  |

| Ref | Exposures (size at birth) |               |              |               |             |              |                        |            |            |                     | Population   | Outcomes               | Effect size<br>[confidence interval],<br>direction of association |                                             |                               |
|-----|---------------------------|---------------|--------------|---------------|-------------|--------------|------------------------|------------|------------|---------------------|--------------|------------------------|-------------------------------------------------------------------|---------------------------------------------|-------------------------------|
|     | Small                     |               |              |               |             | Cont         | Large                  |            |            |                     |              |                        |                                                                   |                                             |                               |
|     | EPT (<28wks)              | ELBW (<1000g) | VPT (<32wks) | VLBW (<1500g) | PT (<37wks) | LBW (<2500g) | SGA (<10th percentile) | BW (cont.) | GA (cont.) | Post Term (>42 wks) | HBW (>4000g) | LGA (>90th percentile) |                                                                   |                                             |                               |
| 150 |                           |               | X            | X             |             |              |                        |            |            |                     |              |                        | 2-23.2y                                                           | ADHD: Combined Symptoms                     | SMD= 0.55 [0.42, 0.68]        |
| 150 | X                         | X             |              |               |             |              |                        |            |            |                     |              |                        | 2.5-23.2y                                                         | ADHD: Combined Symptoms                     | SMD= 0.66 [0.39, 0.92]        |
| 150 |                           |               | X            | X             |             |              |                        |            |            |                     |              |                        | 2-20y                                                             | ADHD: Combined Symptoms                     | SMD= 0.50 [0.38, 0.61]        |
| 150 |                           |               | X            | X             |             |              |                        |            |            |                     |              |                        | 3-32y                                                             | ADHD: Categorically Defined                 | OR= 3.04 [2.19, 4.21]         |
| 150 | X                         | X             |              |               |             |              |                        |            |            |                     |              |                        | 5.96-32y                                                          | ADHD: Categorically Defined                 | OR= 4.05 [2.38, 6.87]         |
| 150 |                           |               | X            | X             |             |              |                        |            |            |                     |              |                        | 3-14y                                                             | ADHD: Categorically Defined                 | OR= 2.25 [1.56, 3.26]         |
| 150 |                           |               | X            | X             |             |              |                        |            |            |                     |              |                        | 2-23.2y                                                           | ADHD: Hyperactivity or Impulsivity Symptoms | SMD= 0.74 [0.35, 1.13]        |
| 150 | X                         | X             |              |               |             |              |                        |            |            |                     |              |                        | 6.2-23.2y                                                         | ADHD: Hyperactivity or Impulsivity Symptoms | SMD= 0.73 [-0.27, 1.18]       |
| 150 |                           |               | X            | X             |             |              |                        |            |            |                     |              |                        | 2-20y                                                             | ADHD: Hyperactivity or Impulsivity Symptoms | SMD= 0.70 [0.00, 1.41]        |
| 150 |                           |               | X            | X             |             |              |                        |            |            |                     |              |                        | 2-20y                                                             | ADHD: Inattentive Symptoms                  | SMD= 1.31 [0.66, 1.96]        |
| 150 | X                         | X             |              |               |             |              |                        |            |            |                     |              |                        | 8-17.3y                                                           | ADHD: Inattentive Symptoms                  | SMD= 1.23 [0.50, 1.96]        |
| 150 |                           |               | X            | X             |             |              |                        |            |            |                     |              |                        | 2-20y                                                             | ADHD: Inattentive Symptoms                  | SMD= 1.34 [0.00, 2.69]        |
| 149 |                           |               |              | X             |             |              |                        |            |            |                     |              |                        | 3-22.5y                                                           | ADHD                                        | R= -0.09 [-0.30, 0.11]        |
| 149 |                           |               |              | X             |             |              |                        |            |            |                     |              |                        | 3-22.5y                                                           | ADHD                                        | r= -0.16 [-0.24, -0.08]       |
| 151 |                           |               |              | X             |             |              |                        |            |            |                     |              |                        | 5-14y                                                             | ADHD                                        | RR= 2.64 [1.85, 3.78]         |
| 141 |                           |               |              | X             |             |              |                        |            |            |                     |              |                        | 5-19y                                                             | ADHD                                        | OR= 1.6 [1.3, 1.8]            |
| 141 |                           |               | v            |               |             |              |                        |            |            |                     |              |                        | 7-14y                                                             | ADHD                                        | OR= 3.7 [1.8, 7.7]            |
| 141 |                           |               |              | LT            |             |              |                        |            |            |                     |              |                        | 5-19y                                                             | ADHD                                        | OR= 1.3 [1.1, 1.5]            |
| 149 |                           |               |              | X             |             |              |                        |            |            |                     |              |                        | 3-22.5y                                                           | ADHD                                        | R= -0.20 [-0.28, -0.13]       |
| 142 |                           |               |              |               | X           |              |                        |            |            |                     |              |                        | 5-14y                                                             | ADHD                                        | OR= 2.36 [0.78, 7.11]         |
| 149 |                           |               |              |               |             | X            |                        |            |            |                     |              |                        | 3-22.5y                                                           | ADHD                                        | R= -0.15 [-0.16, -0.13]       |
| 149 |                           |               |              |               |             |              | X                      |            |            |                     |              |                        | 3-22.5y                                                           | ADHD                                        | Intercept= -0.12/ SE (0.0089) |
|     |                           |               |              |               |             |              |                        |            |            |                     |              |                        |                                                                   | <b>Autism Spectrum Disorder</b>             |                               |
| 140 | X                         |               |              |               |             |              |                        |            |            |                     |              |                        | 8-11y                                                             | Autistic Symptoms Parent-Reported           | SMD= 0.56 [0.29, 0.83]        |
| 152 |                           |               |              | X             |             |              |                        |            |            |                     |              |                        | Children                                                          | Autism Spectrum Disorder                    | Risk ratio= 1.31 [1.16, 1.48] |
| 152 |                           |               |              | X             |             |              |                        |            |            |                     |              |                        | Children                                                          | Autism Spectrum Disorder                    | Risk ratio= 1.26 [1.20, 1.34] |
| 153 |                           |               |              |               | X           |              |                        |            |            |                     |              |                        | <2-15y                                                            | Autism Spectrum Disorder                    | OR= 1.17 [1.09, 1.24]         |
|     |                           |               |              |               |             |              |                        |            |            |                     |              |                        |                                                                   | <b>Suicidal Behaviour</b>                   |                               |
| 154 |                           |               |              | X             |             |              |                        |            |            |                     |              |                        | 10-76y                                                            | Suicide Attempt                             | OR= 1.18 [1.12, 1.25]         |
| 154 |                           |               |              | X             |             |              |                        |            |            |                     |              |                        | 10-49y                                                            | Suicide Attempt                             | OR= 1.39 [1.23, 1.56]         |
| 154 |                           |               |              | X             |             |              |                        |            |            |                     |              |                        | 10-87y                                                            | Suicide                                     | OR= 1.11 [0.98, 1.25]         |
| 154 |                           |               |              | X             |             |              |                        |            |            |                     |              |                        | 1-51y                                                             | Suicide                                     | OR= 1.30 [1.09, 1.55]         |
| 154 |                           |               |              |               | X           |              |                        |            |            |                     |              |                        | 10-87y                                                            | Suicide                                     | OR= 1.18 [1.00, 1.40]         |

Table 1 f. Associations between size-at-birth and nutrition and growth outcomes

| Ref                        | Exposures (size at birth) |               |              |               |             |              |                        | Population      | Outcomes | Effect size<br>[confidence interval],<br>direction of association |                                                                 |                                             |
|----------------------------|---------------------------|---------------|--------------|---------------|-------------|--------------|------------------------|-----------------|----------|-------------------------------------------------------------------|-----------------------------------------------------------------|---------------------------------------------|
|                            | Small                     |               |              |               |             | Cont         | Large                  |                 |          |                                                                   |                                                                 |                                             |
|                            | EPT (<28wks)              | ELBW (<1000g) | VPT (<32wks) | VLBW (<1500g) | PT (<37wks) | LBW (<2500g) | SGA (<10th percentile) |                 |          |                                                                   | BW (cont.)                                                      | GA (cont.)                                  |
| <b>Body Composition</b>    |                           |               |              |               |             |              |                        |                 |          |                                                                   |                                                                 |                                             |
| 155                        |                           |               |              |               | X           |              |                        |                 |          | Infants                                                           | Length (cm)                                                     | MD= -3.71 [-4.60, -2.81]                    |
| 85                         | X                         |               |              |               |             |              |                        |                 |          | 11y                                                               | Height (cm)                                                     | z-score difference= -0.92 (-0.03), p <0.001 |
| 155                        |                           |               |              |               | X           |              |                        |                 |          | Infants                                                           | Weight (kg)                                                     | MD= -0.59 [-0.75, -0.44]                    |
| 85                         | X                         |               |              |               |             |              |                        |                 |          | 11y                                                               | Weight (kg)                                                     | z-score difference= -0.61 (0.18), p <0.001  |
| 155                        |                           |               |              |               | X           |              |                        |                 |          | Infants                                                           | Head Circumference (cm)                                         | MD= -1.03 [-1.52, -0.54]                    |
| 85                         | X                         |               |              |               |             |              |                        |                 |          | 11y                                                               | Head Circumference (cm)                                         | z-score difference= -1.52 (0.44), p <0.001  |
| 85                         | X                         |               |              |               |             |              |                        |                 |          | 11y                                                               | Body Surface Area                                               | z-score difference= -0.10 (-0.01), p <0.001 |
| 155                        |                           |               |              |               | X           |              |                        |                 |          | Infants                                                           | Total Body Fat (%)                                              | MD= 3.06 [0.25, 5.88]                       |
| 156                        |                           |               |              |               | X           |              |                        |                 |          | 4-7y                                                              | Total Body Fat (%)                                              | SMD= -3.05 [-8.73, 2.62]                    |
| 155                        |                           |               |              |               | X           |              |                        |                 |          | Infants                                                           | Fat Mass (kg)                                                   | MD= -0.05 [-0.09, -0.01]                    |
| 155                        |                           |               |              |               | X           |              |                        |                 |          | Infants                                                           | Fat Free Mass (kg)                                              | MD= -0.46 [-0.64, -0.27]                    |
| 156                        |                           |               |              |               | X           |              |                        |                 |          | 4-7y                                                              | Fat Mass Index                                                  | SMD= -1.31 [-5.42, 2.81]                    |
| 156                        |                           |               |              |               | X           |              |                        |                 |          | 4-7y                                                              | Childhood Trunk Fat Index                                       | SMD= 1.03 [-1.64, 3.71]                     |
| 157                        |                           |               |              |               |             |              |                        |                 |          | At birth                                                          | Cord Blood Adiponectin Concentrations                           | SMD= -1.14 [-2.15, -0.12]                   |
| 157                        |                           |               |              |               |             |              |                        |                 |          | At birth                                                          | Cord Blood Adiponectin Concentrations                           | SMD= -1.93 [-4.093, -0.022]                 |
| 157                        |                           |               |              |               |             |              |                        |                 |          | At birth                                                          | Cord Blood Adiponectin Concentrations                           | SMD= -0.383 [-0.744, -0.022]                |
| 158                        |                           |               |              |               |             |              |                        |                 |          | 0.5h-11d                                                          | Total Body Water (%)                                            | MD= 4.40 [2.83, 5.96]                       |
| 158                        |                           |               |              |               |             |              |                        | X               |          | 6h-7d                                                             | Total Body Water (%)                                            | β= -1.44 [-0.63, -2.24] per week            |
| 158                        |                           |               |              |               |             |              |                        |                 |          | 0.5h-11d                                                          | Total Body Water (%)                                            | MD= -5.23 [-4.54, -5.91]                    |
| <b>Bone Mineralization</b> |                           |               |              |               |             |              |                        |                 |          |                                                                   |                                                                 |                                             |
| 159                        |                           |               |              |               |             |              |                        | X               |          | 10y                                                               | Bone Mass Content                                               | β= 0.02 [0.01, 0.04]                        |
| 159                        |                           |               |              |               |             |              |                        | X               |          | 10y                                                               | Bone Mass Density                                               | β= 0.01 [-0.01, 0.03]                       |
| <b>BMI</b>                 |                           |               |              |               |             |              |                        |                 |          |                                                                   |                                                                 |                                             |
| 84                         | X                         |               |              |               |             |              |                        |                 |          | 6-32y                                                             | Body Mass Index (BMI) (kg/m <sup>2</sup> )                      | MD= -0.50 [-1.10, 0.09]                     |
| 84                         |                           | X             |              |               |             |              |                        |                 |          | 5-30y                                                             | Body Mass Index (BMI) (kg/m <sup>2</sup> )                      | MD= -0.30 [-0.54, -0.05]                    |
| 84                         |                           |               |              |               | X           |              |                        |                 |          | 4.5-35.7y                                                         | Body Mass Index (BMI) (kg/m <sup>2</sup> )                      | MD= -0.13 [-0.40, 0.14]                     |
| 84                         |                           |               |              |               | X           |              |                        |                 |          | <10y                                                              | Body Mass Index (BMI) (kg/m <sup>2</sup> )                      | MD= -0.70 [-1.13, -2.28]                    |
| 84                         |                           |               |              |               | X           |              |                        |                 |          | <19y                                                              | Body Mass Index (BMI) (kg/m <sup>2</sup> )                      | MD= 5.20 [-3.82, 14.21]                     |
| 84                         |                           |               |              |               | X           |              |                        |                 |          | 10-19y                                                            | Body Mass Index (BMI) (kg/m <sup>2</sup> )                      | MD= -0.25 [-0.76, 0.26]                     |
| 91                         |                           |               |              |               |             |              |                        | X <sub>GA</sub> |          | 16-46.9y                                                          | Body Mass Index (BMI) (kg/m <sup>2</sup> )                      | β= 0.52 [0.20, 0.84] per kg increase        |
| 91                         |                           |               |              |               |             |              |                        | GA              |          | 16-46.9y                                                          | Body Mass Index (BMI) (kg/m <sup>2</sup> )                      | β= 0.51 [-0.08, 1.11] per kg increase       |
| 91                         |                           |               |              |               |             |              |                        | X               |          | 16-46.9y                                                          | Body Mass Index (BMI) (kg/m <sup>2</sup> )                      | β= 0.52 [0.17, 0.86] per kg increase        |
| 77                         |                           |               |              |               |             |              |                        |                 |          | 0-2y                                                              | BMI Trajectory: Class 2 (Rapid Growth up to 2 years)            | aOR= 2.02 [1.49, 2.74]                      |
| 77                         |                           |               |              |               |             |              |                        |                 |          | 0-6y                                                              | BMI Trajectory: Class 3 (Persistent Rapid Growth up to 6 years) | aOR= 1.89 [0.42, 8.49]                      |
| 77                         |                           |               |              |               |             |              |                        |                 |          | 0-2y                                                              | BMI Trajectory: Class 2 (Rapid Growth)                          | aOR= 1.48 [1.05, 2.10]                      |
| 77                         |                           |               |              |               |             |              |                        |                 |          | 0-6y                                                              | BMI Trajectory: Class 3 (Persistent Rapid Growth)               | aOR= 0.78 [0.10, 6.45]                      |
| 77                         |                           |               |              |               |             |              |                        |                 | X        | 0-2y                                                              | BMI Trajectory: Class 2 (Rapid Growth)                          | aOR= 0.81 [0.68, 0.96]                      |
| 77                         |                           |               |              |               |             |              |                        |                 | X        | 0-6y                                                              | BMI Trajectory: Class 3 (Persistent Rapid Growth)               | aOR= 0.48 [0.15, 1.53]                      |
| 77                         |                           |               |              |               |             |              |                        |                 |          | 0-2y                                                              | BMI Trajectory: Class 2 (Rapid Growth)                          | aOR= 0.98 [0.86, 1.12]                      |
| 77                         |                           |               |              |               |             |              |                        |                 |          | 0-6y                                                              | BMI Trajectory: Class 3 (Persistent Rapid Growth)               | aOR= 1.62 [0.88, 2.99]                      |
| <b>Undernutrition</b>      |                           |               |              |               |             |              |                        |                 |          |                                                                   |                                                                 |                                             |
| 160                        |                           |               |              |               | X           |              |                        |                 |          | 12-60m                                                            | Wasting (weight for length/height for age <2 z-scores)          | OR= 1.55 [1.21, 1.97]                       |
| 160                        |                           |               |              |               |             | X            |                        |                 |          | 12-60m                                                            | Wasting (weight for length/height for age <2 z-scores)          | OR= 2.68 [2.23, 3.21]                       |
| 160                        |                           |               |              |               |             |              | X                      |                 |          | 12-60m                                                            | Wasting (weight for length/height for age <2 z-scores)          | OR= 2.36 [2.14, 2.60]                       |
| 160                        |                           |               |              |               | X           |              |                        |                 |          | 12-60m                                                            | Stunting (length/height for age <2 z-scores)                    | OR= 1.69 [1.48, 1.93]                       |
| 160                        |                           |               |              |               |             | X            |                        |                 |          | 12-60m                                                            | Stunting (length/height for age <2 z-scores)                    | OR= 2.92 [2.56, 3.33]                       |
| 160                        |                           |               |              |               |             |              | X                      |                 |          | 12-60m                                                            | Stunting (length/height for age <2 z-scores)                    | OR= 2.32 [2.12, 2.54]                       |
| 160                        |                           |               |              |               | X           |              |                        |                 |          | 12-60m                                                            | Underweight (weight for age less than 2 z-scores)               | OR= 1.66 [1.42, 1.95]                       |
| 160                        |                           |               |              |               |             | X            |                        |                 |          | 12-60m                                                            | Underweight (weight for age less than 2 z-scores)               | OR= 3.48 [3.14, 3.87]                       |
| 160                        |                           |               |              |               |             |              | X                      |                 |          | 12-60m                                                            | Underweight (weight for age less than 2 z-scores)               | OR= 2.96 [2.61, 3.36]                       |
| <b>Overnutrition</b>       |                           |               |              |               |             |              |                        |                 |          |                                                                   |                                                                 |                                             |
| 161                        |                           |               |              |               | X           |              |                        |                 |          | 0-18y                                                             | Overweight                                                      | OR= 0.60 [0.54, 0.67]                       |
| 161                        |                           |               |              |               |             |              |                        | X               |          | 1-75y                                                             | Overweight                                                      | β= 0.34 [(0.28, 0.40)] per kg increase      |
| 161                        |                           |               |              |               |             |              |                        |                 | X        | 0-18y                                                             | Overweight                                                      | OR= 1.76 [1.65, 1.87]                       |

| Ref | Exposures (size at birth) |               |              |               |             |              |                        |            |            |                     | Population   | Outcomes               | Effect size<br>[confidence interval],<br>direction of association |         |                          |
|-----|---------------------------|---------------|--------------|---------------|-------------|--------------|------------------------|------------|------------|---------------------|--------------|------------------------|-------------------------------------------------------------------|---------|--------------------------|
|     | Small                     |               |              |               |             | Cont         | Large                  |            |            |                     |              |                        |                                                                   |         |                          |
|     | EPT (<28wks)              | ELBW (<1000g) | VPT (<32wks) | VLBW (<1500g) | PT (<37wks) | LBW (<2500g) | SGA (<10th percentile) | BW (cont.) | GA (cont.) | Post Term (>42 wks) | HBW (>4000g) | LGA (>90th percentile) |                                                                   |         |                          |
| 156 |                           |               |              |               | X           |              |                        |            |            |                     |              |                        | 6-14y                                                             | Obesity | OR= 1.19 [1.13, 1.26]    |
| 162 |                           |               |              |               |             | ◊            |                        |            |            |                     |              |                        | 3-18y                                                             | Obesity | OR= 0.87 [0.69, 1.08]    |
| 162 |                           |               |              |               | X           |              |                        |            |            |                     |              |                        | 1-17y                                                             | Obesity | OR= 0.61 [0.46, 0.80]    |
| 162 |                           |               |              |               | X           |              |                        |            |            |                     |              |                        | <6y                                                               | Obesity | OR= 0.61 [0.43, 0.88]    |
| 162 |                           |               |              |               | X           |              |                        |            |            |                     |              |                        | 6-13y                                                             | Obesity | OR= 0.54 [0.32, 0.90]    |
| 162 |                           |               |              |               | X           |              |                        |            |            |                     |              |                        | 13-17y                                                            | Obesity | OR= 0.74 [0.37, 1.49]    |
| 163 |                           |               |              |               |             |              |                        | X          |            |                     |              |                        | 7-11y                                                             | Obesity | β= 0.649 per kg increase |
| 162 |                           |               |              |               |             |              |                        |            |            |                     | ◊            |                        | 1-16y                                                             | Obesity | OR= 2.23 [1.91, 2.61]    |
| 162 |                           |               |              |               |             |              |                        |            |            |                     | X            |                        | 0-17y                                                             | Obesity | OR= 2.07 [1.91, 2.24]    |
| 162 |                           |               |              |               |             |              |                        |            |            |                     | X            |                        | <6y                                                               | Obesity | OR= 2.10 [1.93, 2.29]    |
| 162 |                           |               |              |               |             |              |                        |            |            |                     | X            |                        | 6-13y                                                             | Obesity | OR= 1.76 [1.36, 2.20]    |
| 162 |                           |               |              |               |             |              |                        |            |            |                     | X            |                        | 13-17y                                                            | Obesity | OR= 2.58 [1.56, 4.26]    |

Table 1 g. Associations between size-at-birth and developmental (neurodevelopmental, motor, cognitive and educational) outcomes

| Ref                           | Exposures (size at birth) |               |              |               |             |              |                        |            |            |                     | Population | Outcomes  | Effect size<br>[confidence interval],<br>direction of association |                                        |
|-------------------------------|---------------------------|---------------|--------------|---------------|-------------|--------------|------------------------|------------|------------|---------------------|------------|-----------|-------------------------------------------------------------------|----------------------------------------|
|                               | Small                     |               |              |               |             | Cont         | Large                  |            |            |                     |            |           |                                                                   |                                        |
|                               | EPT (<28wks)              | ELBW (<1000g) | VPT (<32wks) | VLBW (<1500g) | PT (<37wks) | LBW (<2500g) | SGA (<10th percentile) | BW (cont.) | GA (cont.) | Post Term (>42 wks) |            |           |                                                                   | HBW (>4000g)                           |
| <b>Brain neurodevelopment</b> |                           |               |              |               |             |              |                        |            |            |                     |            |           |                                                                   |                                        |
| 164                           |                           | X             | X            |               |             |              |                        |            |            |                     |            | 8-18y     | Total Brain Volume                                                | Cohen's d= -0.58 [-0.43, -0.73]        |
| 164                           |                           | X             | X            |               |             |              |                        |            |            |                     |            | 8-18y     | White Matter Volume                                               | Cohen's d= -0.53 [-0.40, -0.67]        |
| 164                           |                           | X             | X            |               |             |              |                        |            |            |                     |            | 8-18y     | Grey Matter Volume                                                | Cohen's d= -0.62 [-0.48, -0.76]        |
| 164                           |                           | X             | X            |               |             |              |                        |            |            |                     |            | 14-18y    | Cerebellar Volume                                                 | Cohen's d= -0.74 [-0.56, -0.92]        |
| 164                           |                           | X             | X            |               |             |              |                        |            |            |                     |            | 14-17y    | Hippocampus Volume                                                | Cohen's d= -0.47 [-0.26, -0.69]        |
| 164                           |                           | X             | X            |               |             |              |                        |            |            |                     |            | 14-19y    | Size of Corpus Callosum                                           | Cohen's d= -0.71 [-0.34, -1.07]        |
| 165                           |                           |               |              |               | X           |              |                        |            |            |                     |            | 3d-20y    | Fractional Anisotropy Splenium of Corpus Callosum                 | SMD= -0.75 [-0.93, -0.57]              |
| 165                           |                           |               |              |               | X           |              |                        |            |            |                     |            | 3d-20y    | Fractional Anisotropy Genu of Corpus Callosum                     | SMD= -0.65 [-0.97, -0.33]              |
| 165                           |                           |               |              |               | X           |              |                        |            |            |                     |            | 3d-20y    | Fractional Anisotropy Body of Corpus Callosum                     | SMD= -0.73 [-1.13, -0.32]              |
| 166                           |                           |               |              |               | X           |              |                        |            |            |                     |            | Newborn   | Auditory Brainstem Response Interval Between Peaks III & V (ms)   | MD= 0.081 [0.055, 0.110]               |
| 166                           |                           |               |              |               | X           |              |                        |            |            |                     |            | Newborn   | Auditory Brainstem Response: Interval Between Peaks I-V (ms)      | MD= 0.073 [0.036, 0.122]               |
| 166                           |                           |               |              |               | X           |              |                        |            |            |                     |            | Newborn   | Auditory Brainstem Response: Latency of Peak V (ms)               | MD= 0.112 [0.058, 0.165]               |
| 166                           |                           |               |              |               | X           |              |                        |            |            |                     |            | Newborn   | Auditory Brainstem Response: Latency of Peak I (ms)               | MD= 0.048 [0.008, 0.087]               |
| 167                           |                           |               |              |               | X           |              |                        |            |            |                     |            | 9.3-26.5y | Grey matter Left Cuneus Cortex, Brodmann Area 18                  | SDM= 1343, p<0.05                      |
| 167                           |                           |               |              |               | X           |              |                        |            |            |                     |            | 9.3-26.5y | Grey Matter Left Superior Frontal Gyrus, Medial Area 8            | SDM= 1.554, p<0.05                     |
| 167                           |                           |               |              |               | X           |              |                        |            |            |                     |            | 9.3-26.5y | Grey Matter Right Anterior Cingulate, Brodmann Area 32            | SDM= 1.363, p<0.05                     |
| 167                           |                           |               |              |               | X           |              |                        |            |            |                     |            | 9.3-26.5y | Grey Matter Right Inferior Temporal Gyrus, Brodmann Area 20       | SDM= -4.061, p<0.05                    |
| 167                           |                           |               |              |               | X           |              |                        |            |            |                     |            | 9.3-26.5y | Grey Matter Left Inferior Temporal Gyrus, Brodmann Area 20        | SDM= -3.967, p<0.05                    |
| 167                           |                           |               |              |               | X           |              |                        |            |            |                     |            | 9.3-26.5y | Grey Matter Left Superior Frontal Gyrus, Orbital Area 11          | SDM= -2.198, p<0.05                    |
| 167                           |                           |               |              |               | X           |              |                        |            |            |                     |            | 9.3-26.5y | Grey Matter Right Caudate Nucleus                                 | SDM= -2.197, p<0.05                    |
| 167                           |                           |               |              |               | X           |              |                        |            |            |                     |            | 9.3-20.2y | White Matter Right Fusiform Gyrus, Brodmann Area 37               | SDM= 2.934, p<0.05                     |
| 167                           |                           |               |              |               | X           |              |                        |            |            |                     |            | 9.3-20.2y | White Matter Right praecuneus, Brodmann Area 30                   | SDM= 2.920, p<0.05                     |
| 167                           |                           |               |              |               | X           |              |                        |            |            |                     |            | 9.3-20.2y | White Matter Left Inferior Temporal Gyrus, Brodmann Area 19       | SDM= -5.404, p<0.05                    |
| 167                           |                           |               |              |               | X           |              |                        |            |            |                     |            | 9.3-20.2y | White Matter Right Inferior Temporal Gyrus, Brodmann Area 20      | SDM= -4.278, p<0.05                    |
| 167                           |                           |               |              |               | X           |              |                        |            |            |                     |            | 9.3-20.2y | White Matter Left Cortico-Spinal Projections                      | SDM= -2.960, p<0.05                    |
| 167                           |                           |               |              |               | X           |              |                        |            |            |                     |            | 9.3-20.2y | White Matter Right Inferior Frontal Gyrus                         | SDM= -3.599, p<0.05                    |
| <b>Motor</b>                  |                           |               |              |               |             |              |                        |            |            |                     |            |           |                                                                   |                                        |
| <b>Visuomotor</b>             |                           |               |              |               |             |              |                        |            |            |                     |            |           |                                                                   |                                        |
| 147                           |                           |               |              |               | X           |              |                        |            |            |                     |            | 0-14m     | Visual Following                                                  | Cohen's d= -0.13 [-0.49, 0.23]         |
| 147                           |                           |               |              |               | X           |              |                        |            |            |                     |            | Neonates  | Visual Following (animate stimuli)                                | Cohen's d= -0.45 [-0.86, -0.04]        |
| 147                           |                           |               |              |               | X           |              |                        |            |            |                     |            | Neonates  | Visual Following                                                  | Cohen's d= 0.22 [0.03, 0.04]           |
| 147                           |                           |               |              |               | X           |              |                        |            |            |                     |            | Infants   | Visual Following                                                  | Cohen's d= -0.77 [-1.23, -0.31]        |
| 168                           |                           | X             | X            |               |             |              |                        |            |            |                     |            | 5.1-7y    | Visual Perception Abilities (K-ABC)                               | Cohen's d= -0.10 [-0.22, 0.03]         |
| 168                           |                           | X             | X            |               |             |              |                        |            |            |                     |            | 5.2-11.5y | Visual Perception Abilities (MVPT)                                | Cohen's d= -0.10 [-0.31, 0.11]         |
| 168                           |                           | X             | X            |               |             |              |                        |            |            |                     |            | 8-16.8y   | Visual Perception Abilities (JLO)                                 | Cohen's d= -0.60 [-0.87, -0.32]        |
| 168                           |                           | X             | X            |               |             |              |                        |            |            |                     |            | 6.0-8.7y  | Visual Perception Abilities (NEPSY)                               | Cohen's d= -0.92 [-1.44, -0.40]        |
| 168                           |                           | X             | X            |               |             |              |                        |            |            |                     |            | 5.5-8.0y  | Visual Perception Abilities (TVPS-R)                              | Cohen's d= -0.72 [-1.2, -0.23]         |
| 168                           |                           | X             | X            |               |             |              |                        |            |            |                     |            | 3.5-16.8y | Visual Motor Integration (VMI)                                    | Cohen's d= -0.69 [-0.80, -0.58]        |
| 146                           |                           | X             | X            |               |             |              |                        |            |            |                     |            | 3-5y      | Visuomotor Integration Skill: Graphomotor Skill                   | Cohen's d= -0.57 [-0.72, -0.43]        |
| 169                           |                           |               |              |               |             |              | X                      |            |            |                     |            | 10-11y    | Unaided Distance Vision of 6/12 or Worse (indicative of myopia)   | aOR= 0.85 [0.76, 0.95] per kg increase |
| 169                           |                           |               |              |               |             |              | X                      |            |            |                     |            | 15-16y    | Unaided Distance Vision of 6/12 or Worse (indicative of myopia)   | aOR= 1.00 [0.90, 1.11] per kg increase |
| <b>Cerebral Palsy</b>         |                           |               |              |               |             |              |                        |            |            |                     |            |           |                                                                   |                                        |
| 170                           | X                         |               |              |               |             |              |                        |            |            |                     |            | 1-10y     | Cerebral Palsy                                                    | Prevalence Ratio= 129.20               |
| 171                           | X                         |               |              |               |             |              |                        |            |            |                     |            | 2-8y      | Cerebral Palsy                                                    | Prevalence Ratio= 60.92                |
| 171                           |                           | X             |              |               |             |              |                        |            |            |                     |            | 2-8y      | Cerebral Palsy                                                    | Prevalence Ratio= 42.58                |
| 170                           |                           |               | v            |               |             |              |                        |            |            |                     |            | 1-10y     | Cerebral Palsy                                                    | Prevalence Ratio= 54.80                |
| 171                           |                           |               | v            |               |             |              |                        |            |            |                     |            | 2-8y      | Cerebral Palsy                                                    | Prevalence Ratio= 31.96                |
| 171                           |                           |               |              | o             |             |              |                        |            |            |                     |            | 2-8y      | Cerebral Palsy                                                    | Prevalence Ratio= 44.49                |
| 170                           |                           |               |              |               | LLT         |              |                        |            |            |                     |            | 1-10y     | Cerebral Palsy                                                    | Prevalence Ratio= 4.42                 |
| 172                           |                           |               |              |               | LLT         |              |                        |            |            |                     |            | Infants   | Cerebral Palsy                                                    | RR= 1.89 [1.04-3.43]                   |
| 171                           |                           |               |              |               | LT          |              |                        |            |            |                     |            | 2-8y      | Cerebral Palsy                                                    | Prevalence Ratio= 5.00                 |
| 172                           |                           |               |              |               | LT          |              |                        |            |            |                     |            | Infants   | Cerebral Palsy                                                    | RR= 3.47 [1.29, 9.31]                  |
| 173                           |                           |               |              |               | ET          |              |                        |            |            |                     |            | 4-19y     | Cerebral Palsy                                                    | Risk Ratio= 1.75 [1.32, 2.31]          |
| 171                           |                           |               |              |               |             | X            |                        |            |            |                     |            | 2-8y      | Cerebral Palsy                                                    | Prevalence Ratio= 7.64                 |
| 172                           |                           |               |              |               |             | X            |                        |            |            |                     |            | Infants   | Cerebral Palsy                                                    | RR= 3.48 [1.86, 6.49]                  |
| 172                           |                           |               |              |               |             | X            |                        |            |            |                     |            | Infants   | Cerebral Palsy                                                    | RR= 1.39 [0.95, 2.03]                  |

| Ref | Exposures (size at birth) |               |              |               |             |              |                        |            |            |                     | Population   | Outcomes               | Effect size<br>[confidence interval],<br>direction of association |                                                               |                                             |
|-----|---------------------------|---------------|--------------|---------------|-------------|--------------|------------------------|------------|------------|---------------------|--------------|------------------------|-------------------------------------------------------------------|---------------------------------------------------------------|---------------------------------------------|
|     | Small                     |               |              |               |             | Cont         | Large                  |            |            |                     |              |                        |                                                                   |                                                               |                                             |
|     | EPT (<28wks)              | ELBW (<1000g) | VPT (<32wks) | VLBW (<1500g) | PT (<37wks) | LBW (<2500g) | SGA (<10th percentile) | BW (cont.) | GA (cont.) | Post Term (>42 wks) | HBW (>4000g) | LGA (>90th percentile) |                                                                   |                                                               |                                             |
| 170 |                           |               |              |               |             |              |                        |            | X          |                     |              |                        | 1-10y                                                             | Cerebral Palsy                                                | logit= -0.4x+8.6 [8.4, 8.8] per GA category |
|     |                           |               |              |               |             |              |                        |            |            |                     |              |                        |                                                                   | <b>Physical Motor</b>                                         |                                             |
| 174 |                           | △             |              |               |             |              |                        |            |            |                     |              |                        | <7y                                                               | Motor Development                                             | aSMD= -0.26 [-0.53, 0.006]                  |
| 174 |                           |               |              |               | LT          |              |                        |            |            |                     |              |                        | <7y                                                               | Motor Development                                             | aSMD= -0.14 [-0.33, 0.04]                   |
| 174 |                           |               |              |               |             | X            |                        |            |            |                     |              |                        | <7y                                                               | Motor Development                                             | aSMD= -0.14 [-0.23, -0.06]                  |
| 174 |                           |               |              |               |             | X            |                        |            |            |                     |              |                        | <7y                                                               | Motor Development                                             | aSMD= -0.11 [-0.20, -0.02]                  |
| 174 |                           |               |              |               |             | △            |                        |            |            |                     |              |                        | <7y                                                               | Motor Development                                             | aSMD= -0.26 [-0.40, -0.12]                  |
| 174 |                           |               |              |               |             |              |                        |            |            | BT                  |              |                        | <7y                                                               | Motor Development                                             | aSMD= -0.01 [-0.10, 0.07]                   |
| 174 |                           |               |              |               |             |              |                        |            |            | P3                  |              |                        | <7y                                                               | Motor Development                                             | aSMD= 0.02 [-0.09, 0.12]                    |
| 175 |                           | X             | X            |               |             |              |                        |            |            |                     |              |                        | 6-36m                                                             | Motor Skills (BSID-II)                                        | Cohen's d= -0.88 [-0.96, -0.80]             |
| 175 |                           | X             | X            |               |             |              |                        |            |            |                     |              |                        | 5-15y                                                             | Motor Skills (MABC)                                           | Cohen's d= -0.65 [-0.70, -0.60]             |
| 175 |                           | X             | X            |               |             |              |                        |            |            |                     |              |                        | 6-9y                                                              | Fine Motor Skills (BOTMP)                                     | Cohen's d= -0.86 [-0.99, -0.73]             |
| 175 |                           | X             | X            |               |             |              |                        |            |            |                     |              |                        | 8-9y                                                              | Gross Motor Skills (BOTMP)                                    | Cohen's d= -0.53 [-0.60, -0.46]             |
| 141 |                           |               |              |               |             | X            |                        |            |            |                     |              |                        | 2-4y                                                              | Standardised Score for Motor Skills                           | SMD= -0.44 [-0.50, -0.37]                   |
| 141 |                           |               |              |               |             | X            |                        |            |            |                     |              |                        | 4-11y                                                             | Standardised Score for Motor Skills                           | SMD= -0.59 [-0.89, -0.28]                   |
| 176 |                           | X             | X            |               |             |              |                        |            |            |                     |              |                        | 3-6y                                                              | Motor Performance(VMI, MSCA, MABC-2, PDMS BSID-II, PEDI, GD)  | SMD= -0.71 [-0.80, -0.62]                   |
| 176 |                           | X             | X            |               |             |              |                        |            |            |                     |              |                        | 3-7.5y                                                            | Visual Motor Integration (VMI)                                | SMD= -0.70 [-0.87, -0.54]                   |
| 176 |                           | X             | X            |               |             |              |                        |            |            |                     |              |                        | 4y                                                                | Motor (MSCA)                                                  | SMD= -0.92 [-1.16, -0.68]                   |
| 176 |                           | X             | X            |               |             |              |                        |            |            |                     |              |                        | 3-6y                                                              | Movement Assessment (MABC-2)                                  | SMD= -0.71 [-0.92, -0.50]                   |
| 176 |                           | X             | X            |               |             |              |                        |            |            |                     |              |                        | 5-1-6y                                                            | Motor Skills (PDMS)                                           | SMD= -0.71 [-0.98, -0.44]                   |
| 176 |                           | X             | X            |               |             |              |                        |            |            |                     |              |                        | 3-6.2y                                                            | Activity Limitation (BSID-II, MABC-1, ASQ, HSCS, AGTE, FTFQ)  | RR= 3.39 [2.68, 4.27]                       |
| 176 |                           | X             | X            |               |             |              |                        |            |            |                     |              |                        | 3y                                                                | Motor Skills (BSID-II)                                        | RR= 13.94 [3.45, 56.42]                     |
| 176 |                           | X             | X            |               |             |              |                        |            |            |                     |              |                        | 5-5-6.2y                                                          | Movement Assessment (MABC-1)                                  | RR= 2.69 [1.72, 4.22]                       |
| 175 |                           | X             | X            |               |             |              |                        |            |            |                     |              |                        | 8-15y                                                             | General Motor Proficiency: Battery Composite (BOTMP)          | Cohen's d= -0.57 [-0.68, -0.46]             |
| 177 |                           |               |              |               |             | △            |                        |            |            |                     |              |                        | <10y                                                              | Motor Scores                                                  | WMD= -6.45 [-9.64, -3.27]                   |
| 177 |                           |               |              |               |             | △            |                        |            |            |                     |              |                        | <10y                                                              | Motor Scores                                                  | RR= 3.72 [1.32, 10.54]                      |
| 177 |                           |               |              |               |             | X            |                        |            |            |                     |              |                        | 10m-5y                                                            | Motor Scores                                                  | WMD= -4.16 [-5.42, -2.89]                   |
| 177 |                           |               |              |               |             | X            |                        |            |            |                     |              |                        | <10y                                                              | Motor Impairment                                              | RR= 3.32 [1.56, 7.06]                       |
| 176 |                           | X             | X            |               |             |              |                        |            |            |                     |              |                        | 3-6y                                                              | Motor Coordination (KTK and VMI)                              | SMD= -0.47 [-0.76, -0.17]                   |
| 176 |                           | X             | X            |               |             |              |                        |            |            |                     |              |                        | 3-6y                                                              | Upper and Lower Limb Coordination (MSCA)                      | SMD= -0.98 [-1.38, -0.58]                   |
| 178 |                           | X             | X            |               |             |              |                        |            |            |                     |              |                        | 7.5-14.2y                                                         | Developmental Coordination Disorder(<5th percentile MABC)     | OR= 6.29 [4.37, 9.05]                       |
| 178 |                           | X             | X            |               |             |              |                        |            |            |                     |              |                        | 8-13y                                                             | Developmental Coordination Disorder(<5-15th percentile MABC)  | OR= 8.66 [3.40, 22.07]                      |
| 139 |                           |               |              |               |             | X            |                        |            |            |                     |              |                        | 1-60m                                                             | Motor activity (Behaviour)                                    | Cohen's d= -0.07 [-0.25, 0.39]              |
| 179 |                           |               |              |               |             | X            |                        |            |            |                     |              |                        | 0-21y                                                             | Neuromusculoskeletal and Movement-Related Functions           | Cohen's d= 0.068, p<0.358                   |
| 179 |                           |               |              |               |             | X            |                        |            |            |                     |              |                        | 0-21y                                                             | Neuromusculoskeletal and Movement-Related Functions           | Cohen's d= -0.391, p<0.000                  |
| 180 |                           |               |              |               |             |              |                        |            | X          |                     |              |                        | 5-67y                                                             | Grip muscle Strength                                          | β= 0.86 [0.58, 1.15] per kg increase        |
| 180 |                           |               |              |               |             |              |                        |            | X          |                     |              |                        | <21                                                               | Grip muscle Strength                                          | β= -0.48 [0.05, 0.92] per kg increase       |
| 175 |                           |               |              |               |             |              |                        |            | X          |                     |              |                        | 6-36m                                                             | Psychomotor Development Outcomes (BSID-II)                    | R= 0.54, p= 0.008                           |
| 175 |                           |               |              |               |             |              |                        |            | X          |                     |              |                        | 6-36m                                                             | Psychomotor Development Outcomes (BSID-II)                    | R= 0.42, p= 0.05                            |
| 175 |                           |               |              |               |             |              |                        |            | X          |                     |              |                        | 5-15y                                                             | Overall Motor Impairment (MABC)                               | R= 0.25, p= 0.53                            |
| 175 |                           |               |              |               |             |              |                        |            | X          |                     |              |                        | 5-15y                                                             | Overall Motor Impairment (MABC)                               | R= 0.21, p= 0.58                            |
|     |                           |               |              |               |             |              |                        |            |            |                     |              |                        |                                                                   | <b>Cognitive</b>                                              |                                             |
|     |                           |               |              |               |             |              |                        |            |            |                     |              |                        |                                                                   | <b>Intellectual Disabilities</b>                              |                                             |
| 181 |                           | X             |              |               |             |              |                        |            |            |                     |              |                        | 4-17y                                                             | Executive Functioning                                         | Hedge's g= -0.51 [-0.58, -0.44]             |
| 181 |                           | X             |              |               |             |              |                        |            |            |                     |              |                        | 4-10y                                                             | Executive Functioning                                         | Hedge's g= -0.51 [-0.60, -0.42]             |
| 181 |                           | X             |              |               |             |              |                        |            |            |                     |              |                        | 11-17y                                                            | Executive Functioning                                         | Hedge's g= -0.52 [-0.62, -0.42]             |
| 181 |                           | X             |              |               |             |              |                        |            |            |                     |              |                        | 4-17y                                                             | Processing Speed                                              | Hedge's g= -0.49 [-0.60, -0.39]             |
| 181 |                           | X             |              |               |             |              |                        |            |            |                     |              |                        | 4-10y                                                             | Processing Speed                                              | Hedge's g= -0.53 [-0.65, -0.41]             |
| 181 |                           | X             |              |               |             |              |                        |            |            |                     |              |                        | 11-17y                                                            | Processing Speed                                              | Hedge's g= -0.30 [-0.52, -0.08]             |
| 141 |                           |               |              |               |             | X            |                        |            |            |                     |              |                        | 4-11y                                                             | Processing Speed                                              | SMD= -0.53 [-0.66, -0.41]                   |
| 148 |                           |               |              |               |             | X            |                        |            |            |                     |              |                        | 2-17y                                                             | Inhibition                                                    | Cohen's d= 0.25 [0.03, 0.47]                |
| 148 | 26                        |               |              |               |             | X            |                        |            |            |                     |              |                        | 2-17y                                                             | Inhibition                                                    | Cohen's d= 0.50 [0.10, 0.89]                |
| 182 |                           |               |              |               |             | X            | X                      |            |            |                     |              |                        | 4y-11y                                                            | Inhibition                                                    | SMD= 0.39 [0.55, 0.23]                      |
| 148 |                           |               |              |               |             | X            |                        |            |            |                     |              |                        | 2-17y                                                             | Planning                                                      | Cohen's d= 0.38 [0.08, 0.68]                |
| 148 | 26                        |               |              |               |             | X            |                        |            |            |                     |              |                        | 2-17y                                                             | Planning                                                      | Cohen's d= 0.69 [0.50, 0.88]                |
| 177 |                           |               |              |               |             |              |                        |            | X          |                     |              |                        | ≤3y                                                               | Developmental Delay (visual, hearing and speech difficulties) | RR= 1.97 [1.41, 2.73]                       |
| 146 |                           | X             | X            |               |             |              |                        |            |            |                     |              |                        | 3-5y                                                              | Executive Functions: Global Executive Composite Score         | Cohen's d= 0.49 [0.32, 0.66]                |
| 148 |                           |               |              |               |             | X            |                        |            |            |                     |              |                        | 2-17y                                                             | Shifting (measured by Trail Making Test)                      | Cohen's d= 0.50 [0.36, 0.64]                |

| Ref | Exposures (size at birth) |               |              |               |             |              |                        | Population | Outcomes   | Effect size<br>[confidence interval],<br>direction of association |              |                        |            |                                                          |                                                  |
|-----|---------------------------|---------------|--------------|---------------|-------------|--------------|------------------------|------------|------------|-------------------------------------------------------------------|--------------|------------------------|------------|----------------------------------------------------------|--------------------------------------------------|
|     | Small                     |               |              |               | Cont        | Large        |                        |            |            |                                                                   |              |                        |            |                                                          |                                                  |
|     | EPT (<28wks)              | ELBW (<1000g) | VPT (<32wks) | VLBW (<1500g) | PT (<37wks) | LBW (<2500g) | SGA (<10th percentile) | BW (cont.) | GA (cont.) | Post Term (>42 wks)                                               | HBW (>4000g) | LGA (>90th percentile) |            |                                                          |                                                  |
| 148 |                           |               |              |               | X           |              |                        |            |            |                                                                   |              |                        | 2-17y      | Shifting (measured by Sorting Tasks)                     | Cohen's d= 0.10 [-0.06, 0.27]                    |
| 139 |                           |               |              |               | X           |              |                        |            |            |                                                                   |              |                        | 1-60m      | Inhibition (Behaviour)                                   | Cohen's d= -0.02 [-0.37, 0.32]                   |
| 139 |                           |               |              |               | X           |              |                        |            |            |                                                                   |              |                        | 1-60m      | Inhibitory Control (Psychological)                       | Cohen's d= 0.13 [-0.11, 0.37]                    |
| 139 |                           |               |              |               | X           |              |                        |            |            |                                                                   |              |                        | 1-60m      | Distractibility (Behaviour)                              | Cohen's d= 0.004 [-0.25, 0.26]                   |
| 183 |                           |               |              |               | ET          |              |                        |            |            |                                                                   |              |                        | 3-6y       | Cognitive: General                                       | SMD= 0.05 [0.02, 0.08]                           |
| 182 |                           |               |              |               | X           | X            |                        |            |            |                                                                   |              |                        | 5-11-11.2y | Cognitive Flexibility                                    | SMD= 0.51 [0.72, 0.31]                           |
| 138 |                           |               | ^            | X             |             |              |                        |            |            |                                                                   |              |                        | 8.2-22.3y  | Cognitive Flexibility                                    | Cohen's d= -0.49 [-0.66, -0.33]                  |
| 151 |                           |               |              |               | X           |              |                        |            |            |                                                                   |              |                        | 5-14y      | Cognitive Test Scores                                    | WMD= 10.85 [9.23, 12.47]                         |
| 177 |                           |               |              |               |             |              |                        |            |            |                                                                   |              |                        | <10y       | Cognitive Score                                          | WMD= -7.23 [-9.20, -5.26]                        |
| 177 |                           |               |              |               |             |              |                        |            |            |                                                                   |              |                        | <10y       | Cognitive Score                                          | RR= 3.59 [1.55, 8.32]                            |
| 177 |                           |               |              |               |             | X            |                        |            |            |                                                                   |              |                        | 2m-18y     | Cognitive Score                                          | WMD= -6.14 [-8.70, -3.57]                        |
| 177 |                           |               |              |               |             | X            |                        |            |            |                                                                   |              |                        | 2m-9y      | Cognitive Score                                          | WMD= -4.56 [-6.38, -2.74]                        |
| 177 |                           |               |              |               |             | X            |                        |            |            |                                                                   |              |                        | 10-18y     | Cognitive Score                                          | WMD= -15.45 [-24.08, -6.83]                      |
| 151 |                           |               |              |               |             |              |                        | X          |            |                                                                   |              |                        | 5-14y      | Cognitive Test Scores                                    | R <sup>2</sup> = 0.51, p<0.001 per g increase    |
| 151 |                           |               |              |               |             |              |                        |            | X          |                                                                   |              |                        | 5-14y      | Cognitive Test Scores                                    | R <sup>2</sup> = 0.49, p<0.001 per week increase |
| 174 |                           |               | ^            |               |             |              |                        |            |            |                                                                   |              |                        | <7y        | Cognitive Development                                    | aSMD= -0.16 [-0.34, 0.31]                        |
| 174 |                           |               |              |               | LT          |              |                        |            |            |                                                                   |              |                        | <7y        | Cognitive Development                                    | aSMD= -0.21 [-0.39, -0.04]                       |
| 174 |                           |               |              |               |             |              |                        |            |            |                                                                   |              |                        | <7y        | Cognitive Development                                    | aSMD= -0.27 [-0.49, -0.07]                       |
| 174 |                           |               |              |               |             | X            |                        |            |            |                                                                   |              |                        | <7y        | Cognitive Development                                    | aSMD= -0.13 [-0.20, -0.07]                       |
| 174 |                           |               |              |               |             | X            |                        |            |            |                                                                   |              |                        | <7y        | Cognitive Development                                    | aSMD= -0.07 [-0.12, -0.03]                       |
| 174 |                           |               |              |               |             |              |                        |            |            |                                                                   |              |                        | <7y        | Cognitive Development                                    | aSMD= -0.05 [-0.11, 0.12]                        |
| 174 |                           |               |              |               |             |              |                        |            |            |                                                                   |              |                        | <7y        | Cognitive Development                                    | aSMD= -0.09 [-0.24, 0.07]                        |
| 179 |                           |               |              |               |             | X            |                        |            |            |                                                                   |              |                        | 0-21y      | Mental Function                                          | Cohen's d= -0.263, p<0.001                       |
| 179 |                           |               |              |               |             | X            |                        |            |            |                                                                   |              |                        | 0-21y      | Mental Function                                          | Cohen's d= -0.655, p<0.001                       |
| 184 |                           |               |              |               |             | X            |                        |            |            |                                                                   |              |                        | 6-18y      | Special Educational Needs                                | RR= 2.85 [2.12, 3.84]                            |
|     |                           |               |              |               |             |              |                        |            |            |                                                                   |              |                        |            | <b>Memory</b>                                            |                                                  |
| 138 |                           |               | ^            | X             |             |              |                        |            |            |                                                                   |              |                        | 8-14.9y    | Working Memory                                           | Cohen's d= -0.36 [-0.47, -0.20]                  |
| 141 |                           |               |              |               | X           |              |                        |            |            |                                                                   |              |                        | 4-11y      | Working Memory                                           | SMD= -0.61 [-0.72, -0.50]                        |
| 141 |                           |               |              |               | X           |              |                        |            |            |                                                                   |              |                        | 11-18y     | Working Memory                                           | SMD= -0.53 [-0.72, -0.34]                        |
| 182 |                           |               |              |               | X           | X            |                        |            |            |                                                                   |              |                        | 4-14y      | Working Memory                                           | SMD= 0.52 [0.65, 0.38]                           |
| 182 |                           |               |              |               |             |              |                        |            | X          |                                                                   |              |                        | 4.5-12y    | Working Memory                                           | $\beta$ = 0.07 [0.01, 0.13] per wk increase      |
| 146 |                           |               | X            | X             |             |              |                        |            |            |                                                                   |              |                        | 3-5y       | Short-term Verbal Memory (per number of digits recalled) | Cohen's d= -0.49 [-0.75, -0.22]                  |
|     |                           |               |              |               |             |              |                        |            |            |                                                                   |              |                        |            | <b>Intelligence Quotient (IQ)</b>                        |                                                  |
| 185 | X                         |               |              |               |             |              |                        |            |            |                                                                   |              |                        | 3-16y      | Intelligence Quotient                                    | WMD= -13.9 [-11.5, -16.2]                        |
| 186 |                           | X             |              |               |             |              |                        |            |            |                                                                   |              |                        | 4-18y      | Intelligence Quotient                                    | WMD= -13.95 [-11.71, -16.20]                     |
| 187 |                           | X             |              |               |             |              |                        |            |            |                                                                   |              |                        | <10y       | Intelligence Quotient/Development Quotient               | MD= -6.18                                        |
| 188 |                           |               |              | X             |             |              |                        |            |            |                                                                   |              |                        | 5-20.1y    | Intelligence Quotient Score                              | SMD= -0.86 [-0.94, -0.78]                        |
| 181 |                           |               |              | X             |             |              |                        |            |            |                                                                   |              |                        | 4-17y      | Intelligence Test                                        | Hedge's g= -0.82 [-0.90, -0.74]                  |
| 181 |                           |               |              | X             |             |              |                        |            |            |                                                                   |              |                        | 4-10y      | Intelligence Test                                        | Hedge's g= -0.86 [-0.99, -0.73]                  |
| 181 |                           |               |              | X             |             |              |                        |            |            |                                                                   |              |                        | 11-17y     | Intelligence Test                                        | Hedge's g= -0.76 [-0.91, -0.60]                  |
| 185 |                           |               |              | v             |             |              |                        |            |            |                                                                   |              |                        | 3-16y      | Intelligence Quotient                                    | WMD= -11.4 [-9.7, -13.2]                         |
| 186 |                           |               |              |               | o           |              |                        |            |            |                                                                   |              |                        | 5-26y      | Intelligence Quotient                                    | WMD= -9.85 [-8.43, -11.28]                       |
| 187 |                           |               |              |               | X           |              |                        |            |            |                                                                   |              |                        | <10y       | Intelligence Quotient/Development Quotient               | MD= -7.94                                        |
| 185 |                           |               |              |               |             | X            |                        |            |            |                                                                   |              |                        | 3-16y      | Intelligence Quotient                                    | WMD= -11.94 [-10.47, -13.42]                     |
| 141 |                           |               |              |               |             | X            |                        |            |            |                                                                   |              |                        | 2-31y      | Full-Scale Intelligence Quotient                         | SMD= -0.70 [-0.73, -0.66]                        |
| 141 | X                         |               |              |               |             |              |                        |            |            |                                                                   |              |                        | 2-18y      | Full-Scale Intelligence Quotient                         | SMD= -0.78 [-0.85, -0.72]                        |
| 141 |                           |               | v            |               |             |              |                        |            |            |                                                                   |              |                        | 2-24y      | Full-Scale Intelligence Quotient                         | SMD= -0.73 [-0.78, -0.67]                        |
| 141 |                           |               |              |               |             | LT           |                        |            |            |                                                                   |              |                        | 3-31y      | Full-Scale Intelligence Quotient                         | SMD= -0.24 [-0.35, -0.12]                        |
| 141 |                           |               |              |               |             | X            |                        |            |            |                                                                   |              |                        | 2-4y       | Full-Scale Intelligence Quotient                         | SMD= -0.72 [-0.80, -0.65]                        |
| 141 |                           |               |              |               |             | X            |                        |            |            |                                                                   |              |                        | 4-11y      | Full-Scale Intelligence Quotient                         | SMD= -0.73 [-0.78, -0.67]                        |
| 141 |                           |               |              |               |             | X            |                        |            |            |                                                                   |              |                        | 11-18y     | Full-Scale Intelligence Quotient                         | SMD= -0.73 [-0.85, -0.62]                        |
| 141 |                           |               |              |               |             | X            |                        |            |            |                                                                   |              |                        | 5-31y      | Performance Intelligence Quotient                        | SMD= -0.67 [-0.73, -0.60]                        |
| 141 | X                         |               |              |               |             |              |                        |            |            |                                                                   |              |                        | 8-18y      | Performance Intelligence Quotient                        | SMD= -0.89 [-1.05, -0.72]                        |
| 141 |                           |               | v            |               |             |              |                        |            |            |                                                                   |              |                        | 5-24y      | Performance Intelligence Quotient                        | SMD= -0.65 [-0.73, -0.57]                        |
| 141 |                           |               |              |               |             | X            |                        |            |            |                                                                   |              |                        | 4-11y      | Performance Intelligence Quotient                        | SMD= -0.70 [-0.78, -0.61]                        |
| 141 |                           |               |              |               |             | X            |                        |            |            |                                                                   |              |                        | 11-18y     | Performance Intelligence Quotient                        | SMD= -0.90 [-1.09, -0.70]                        |
| 141 |                           |               |              |               |             | X            |                        |            |            |                                                                   |              |                        | 5-31y      | Verbal Intelligence Quotient                             | SMD= -0.53 [-0.60, -0.47]                        |
| 141 | X                         |               |              |               |             |              |                        |            |            |                                                                   |              |                        | 8-18y      | Verbal Intelligence Quotient                             | SMD= -0.67 [-0.83, -0.51]                        |
| 141 |                           |               | v            |               |             |              |                        |            |            |                                                                   |              |                        | 5-24y      | Verbal Intelligence Quotient                             | SMD= -0.55 [-0.63, -0.48]                        |

| Ref | Exposures (size at birth) |               |              |               |             |              |                        | Population | Outcomes   | Effect size<br>[confidence interval],<br>direction of association |              |                        |            |                                                                            |                                       |
|-----|---------------------------|---------------|--------------|---------------|-------------|--------------|------------------------|------------|------------|-------------------------------------------------------------------|--------------|------------------------|------------|----------------------------------------------------------------------------|---------------------------------------|
|     | Small                     |               |              |               | Cont        | Large        |                        |            |            |                                                                   |              |                        |            |                                                                            |                                       |
|     | EPT (<28wks)              | ELBW (<1000g) | VPT (<32wks) | VLBW (<1500g) | PT (<37wks) | LBW (<2500g) | SGA (<10th percentile) | BW (cont.) | GA (cont.) | Post Term (>42 wks)                                               | HBW (>4000g) | LGA (>90th percentile) |            |                                                                            |                                       |
| 141 |                           |               |              |               | LT          |              |                        |            |            |                                                                   |              |                        | 12-31y     | Verbal Intelligence Quotient                                               | SMD= -0.14 [-0.35, 0.07]              |
| 141 |                           |               |              |               | X           |              |                        |            |            |                                                                   |              |                        | 4-11y      | Verbal Intelligence Quotient                                               | SMD= -0.57 [-0.65, -0.48]             |
| 141 |                           |               |              |               | X           |              |                        |            |            |                                                                   |              |                        | 11-18y     | Verbal Intelligence Quotient                                               | SMD= -0.49 [-0.65, -0.33]             |
| 146 |                           | X             | X            |               |             |              |                        |            |            |                                                                   |              |                        | 3-5y       | Total Intelligence Quotient Score (per IQ score)                           | Cohen's d= -0.77 [-0.88, -0.66]       |
| 146 |                           | X             | X            |               |             |              |                        |            |            |                                                                   |              |                        | 3-5y       | Intelligence Quotient Vulnerability                                        | Risk ratio= 3.61 [2.58, 5.06]         |
| 183 |                           |               |              |               | LT          |              |                        |            |            |                                                                   |              |                        | 2-6y       | Cognitive: General                                                         | aRisk ratio= 1.38 [1.06, 1.79]        |
| 183 |                           |               |              |               | LT          |              |                        |            |            |                                                                   |              |                        | 3-6y       | Cognitive: Verbal Intelligence Quotient                                    | aRisk Ratio= 1.34 [0.83, 2.17]        |
| 186 |                           |               |              |               |             | X            |                        |            |            |                                                                   |              |                        | 5-14y      | Intelligence Quotient                                                      | WMD= -6.83 [-4.76, -8.89]             |
| 177 |                           |               |              |               | X           |              |                        |            |            |                                                                   |              |                        | <10y       | Low Cognitive Score: IQ<25 <sup>th</sup> Percentile or Mental Quotient <85 | RR= 2.69 [1.34, 5.39]                 |
| 177 |                           |               |              |               | X           |              |                        |            |            |                                                                   |              |                        | 10-18y     | Low Cognitive Score: IQ<25 <sup>th</sup> Percentile or Mental Quotient <86 | RR= 1.28 [1.02, 1.61]                 |
| 189 |                           |               |              |               | X           |              |                        |            |            |                                                                   |              |                        | 14-22.2y   | Full-scale Intelligence Quotient Score                                     | MD= -7.63 [-5.95, -9.31]              |
| 186 |                           |               |              |               | X           |              |                        |            |            |                                                                   |              |                        | 4-27y      | Intelligence Quotient                                                      | WMD= -10.47 [-9.26, -11.68]           |
| 186 |                           |               |              |               | X           |              |                        |            |            |                                                                   |              |                        | <10y       | Intelligence Quotient                                                      | WMD= -10.58 [-8.87, -12.30]           |
| 186 |                           |               |              |               | X           |              |                        |            |            |                                                                   |              |                        | 10-18y     | Intelligence Quotient                                                      | WMD= -9.82 [-7.88, -11.75]            |
| 187 |                           |               |              |               | X           |              |                        |            |            |                                                                   |              |                        | 0-10y      | Intelligence Quotient/Development Quotient Score                           | MD= -4.14                             |
| 187 |                           |               |              |               | X           |              |                        |            |            |                                                                   |              |                        | ≤2y        | Intelligence Quotient/Development Quotient Score                           | MD= -0.01 (1.77)                      |
| 187 |                           |               |              |               | X           |              |                        |            |            |                                                                   |              |                        | 2-5y       | Intelligence Quotient/Development Quotient Score                           | MD= -8.08 (0.86)                      |
| 187 |                           |               |              |               | X           |              |                        |            |            |                                                                   |              |                        | 5-10y      | Intelligence Quotient/Development Quotient Score                           | MD= -6.9 (2.33)                       |
| 142 |                           |               |              |               |             | X            |                        |            |            |                                                                   |              |                        | 5-19y      | Verbal Intelligence Quotient                                               | SMD= -0.26 [-0.36, -0.16]             |
| 142 |                           |               |              |               |             | X            |                        |            |            |                                                                   |              |                        | 5-19y      | Performance Intelligence Quotient                                          | SMD= -0.36 [-0.46, -0.25]             |
| 188 |                           |               |              |               |             | X            |                        |            |            |                                                                   |              |                        | 5-20.1y    | Intelligence Quotient Score                                                | MD= -0.04 [-0.15, 0.07]               |
| 142 |                           |               |              |               |             | X            |                        |            |            |                                                                   |              |                        | 5-18.1y    | Intelligence Quotient                                                      | SMD= -0.38 [+T156:T203-0.51, -0.25]   |
| 188 |                           |               |              |               |             |              | X                      |            |            |                                                                   |              |                        | 5-20.1y    | Intelligence Quotient Score                                                | MD= 0.02 [0.003, 0.02] per g increase |
| 142 |                           |               |              |               |             |              | X                      |            |            |                                                                   |              |                        | 5-19y      | Total Intelligence Quotient                                                | R= 0.546, p= 0.103                    |
| 142 |                           |               |              |               |             |              | X                      |            |            |                                                                   |              |                        | 5-19y      | Verbal Intelligence Quotient                                               | R= 0.406, p= 0.497                    |
| 142 |                           |               |              |               |             |              | X                      |            |            |                                                                   |              |                        | 5-19y      | Performance Intelligence Quotient                                          | R= 0.771, p= 0.127                    |
| 188 |                           |               |              |               |             |              |                        | X          |            |                                                                   |              |                        | 5-20.1y    | Intelligence Quotient Score                                                | MD= 1.26 [0.52, 2.00] per wk increase |
| 142 |                           |               |              |               |             |              |                        | X          |            |                                                                   |              |                        | 5-19y      | Total Intelligence Quotient                                                | R= 0.509, p= 0.133                    |
| 142 |                           |               |              |               |             |              |                        | X          |            |                                                                   |              |                        | 5-19y      | Verbal Intelligence Quotient                                               | R= 0.334, p= 0.517                    |
| 142 |                           |               |              |               |             |              |                        | X          |            |                                                                   |              |                        | 5-19y      | Performance Intelligence Quotient                                          | R= 0.673, p= 0.143                    |
|     |                           |               |              |               |             |              |                        |            |            |                                                                   |              |                        |            | <b>Communication</b>                                                       |                                       |
| 190 |                           | X             | X            |               |             |              |                        |            |            |                                                                   |              |                        | 4-12.2y    | Expressive Language: Production of Speech                                  | Hedges' g= -0.63 [-0.80, -0.45]       |
| 190 |                           | X             | X            |               |             |              |                        |            |            |                                                                   |              |                        | 4-6.3y     | Expressive Language: Production of Speech                                  | Hedges' g= -0.71 [-0.86, -0.55]       |
| 190 |                           | X             | X            |               |             |              |                        |            |            |                                                                   |              |                        | 4-12.2y    | Receptive Language: Comprehension of Language                              | Hedges' g= -0.77 [-0.94, -0.60]       |
| 190 |                           | X             | X            |               |             |              |                        |            |            |                                                                   |              |                        | 4-6.3y     | Receptive Language: Comprehension of Language                              | Hedges' g= -0.83 [-0.97, -0.69]       |
| 138 |                           | △             | X            |               |             |              |                        |            |            |                                                                   |              |                        | 13.4-23.2y | Verbal Fluency                                                             | Cohen's d= -0.57 [-0.82, -0.32]       |
| 174 |                           | △             |              |               |             |              |                        |            |            |                                                                   |              |                        | <7y        | Language Development                                                       | aSMD= -0.20 [-0.55, 0.15]             |
| 191 |                           | X             | X            |               |             |              |                        |            |            |                                                                   |              |                        | 6-8y       | Total Language Score                                                       | MD= -13.20 [-15.88, -10.51]           |
| 191 |                           | X             | X            |               |             |              |                        |            |            |                                                                   |              |                        | 5-8y       | Receptive Language Score                                                   | MD= -6.10 [-8.47, -3.73]              |
| 191 |                           | X             | X            |               |             |              |                        |            |            |                                                                   |              |                        | 5-8y       | Expressive Language Score                                                  | MD= -6.16 [-8.49, -3.84]              |
| 191 |                           | X             | X            |               |             |              |                        |            |            |                                                                   |              |                        | 4-7y       | Pragmatics                                                                 | MD= -8.30 [-20.76, 4.15]              |
| 191 |                           | X             | X            |               |             |              |                        |            |            |                                                                   |              |                        | 5-8y       | Phonological Awareness                                                     | MD= -1.46[-1.91, -1.01]               |
| 148 |                           |               |              |               | X           |              |                        |            |            |                                                                   |              |                        | 2-17y      | Semantic Fluency                                                           | Cohen's d= 0.43 [0.28, 0.59]          |
| 148 |                           |               |              |               | X           |              |                        |            |            |                                                                   |              |                        | 2-17y      | Phonemic Fluency                                                           | Cohen's d= 0.45 [0.30, 0.60]          |
| 148 | 26                        |               |              |               |             |              |                        |            |            |                                                                   |              |                        | 2-17y      | Phonemic Fluency                                                           | Cohen's d= 0.58 [0.30, 0.86]          |
| 192 |                           |               |              |               | X           |              |                        |            |            |                                                                   |              |                        | 3-12y      | Simple Language Function                                                   | Cohen's d= -0.45 [-0.59, -0.30]       |
| 192 |                           |               |              |               | X           |              |                        |            |            |                                                                   |              |                        | 3-12y      | Total Complex Language Function                                            | Cohen's d= -0.62 [-0.82, -0.43]       |
| 192 |                           |               |              |               | X           |              |                        |            |            |                                                                   |              |                        | 3-12y      | Total Complex Language Function (measured by CELF)                         | Cohen's d= -0.71 [-0.85, -0.57]       |
| 192 |                           |               |              |               | X           |              |                        |            |            |                                                                   |              |                        | 3-12y      | Total Complex Language Function excluding major disabilities               | Cohen's d= -0.54 [-1.01, -0.07]       |
| 192 |                           |               |              |               | X           |              |                        |            |            |                                                                   |              |                        | 4-12y      | Receptive Language                                                         | Cohen's d= -0.69 [-0.82, -0.55]       |
| 192 |                           |               |              |               | X           |              |                        |            |            |                                                                   |              |                        | 4-12y      | Expressive Language                                                        | Cohen's d= -0.61 [-0.74, -0.47]       |
| 183 |                           |               |              |               | LT          |              |                        |            |            |                                                                   |              |                        | 2-3y       | Cognitive: Language                                                        | aRR= 1.39 [1.21, 1.60]                |
| 174 |                           |               |              |               | LT          |              |                        |            |            |                                                                   |              |                        | <7y        | Language Development                                                       | aSMD= -0.05 [-0.23, 0.13]             |
| 174 |                           |               |              |               | △           |              |                        |            |            |                                                                   |              |                        | <7y        | Language Development                                                       | aSMD= -0.28 [-0.60, 0.05]             |
| 174 |                           |               |              |               | X           |              |                        |            |            |                                                                   |              |                        | <7y        | Language Development                                                       | aSMD= -0.11 [-0.22, 0.00]             |
| 174 |                           |               |              |               | X           |              |                        |            |            |                                                                   |              |                        | <7y        | Language Development                                                       | aSMD= -0.05 [-0.10, 0.01]             |
| 174 |                           |               |              |               |             | BT           |                        |            |            |                                                                   |              |                        | <7y        | Language Development                                                       | aSMD= -0.06 [-0.18, 0.06]             |
| 174 |                           |               |              |               |             | P3           |                        |            |            |                                                                   |              |                        | <7y        | Language Development                                                       | aSMD= 0.03 [-0.13, 0.19]              |



| Ref | Exposures (size at birth) |               |              |               |             |              |                        |            |            |                     | Population   | Outcomes               | Effect size<br>[confidence interval],<br>direction of association |                                                                 |                                                    |
|-----|---------------------------|---------------|--------------|---------------|-------------|--------------|------------------------|------------|------------|---------------------|--------------|------------------------|-------------------------------------------------------------------|-----------------------------------------------------------------|----------------------------------------------------|
|     | Small                     |               |              |               |             | Cont         | Large                  |            |            |                     |              |                        |                                                                   |                                                                 |                                                    |
|     | EPT (<28wks)              | ELBW (<1000g) | VPT (<32wks) | VLBW (<1500g) | PT (<37wks) | LBW (<2500g) | SGA (<10th percentile) | BW (cont.) | GA (cont.) | Post Term (>42 wks) | HBW (>4000g) | LGA (>90th percentile) |                                                                   |                                                                 |                                                    |
|     |                           |               |              |               |             |              |                        |            |            |                     |              |                        |                                                                   | <b>Specific Learning Disorder: Language (reading, spelling)</b> |                                                    |
| 193 | X                         |               |              |               |             |              |                        |            |            |                     |              |                        | 5-18y                                                             | Reading                                                         | MD= -8.54 [-10.52, -6.55]                          |
| 193 |                           |               | v            |               |             |              |                        |            |            |                     |              |                        | 5-18y                                                             | Reading                                                         | MD= -1.42 [-4.58, 1.75]                            |
| 194 |                           |               | X            |               |             |              |                        |            |            |                     |              |                        | 6-12.8y                                                           | Reading comprehension                                           | Cohen's d= -0.57 [-0.68, -0.46]                    |
| 194 |                           |               | X            |               |             |              |                        |            |            |                     |              |                        | 6-12.8y                                                           | Reading excluding children with major disabilities              | Cohen's d= -0.59 [-1.01, -0.17]                    |
| 138 |                           |               | △            | X             |             |              |                        |            |            |                     |              |                        | 5-20y                                                             | Reading                                                         | Cohen's d= -0.48 [-0.60, -0.34]                    |
| 193 |                           |               |              |               |             | X            | X                      |            |            |                     |              |                        | 5-18y                                                             | Reading: Aggregate Measure of Reading                           | MD= -7.98 [-13.05, -2.91]                          |
| 193 |                           |               |              |               |             | X            | X                      |            |            |                     |              |                        | 5-18y                                                             | Reading: Decoding                                               | MD= -10.18 [-16.83, -3.53]                         |
| 193 |                           |               |              |               |             | X            | X                      |            |            |                     |              |                        | 5-18y                                                             | Reading: Word Identification                                    | MD= -7.44 [-9.08, -5.80]                           |
| 193 |                           |               |              |               |             | X            | X                      |            |            |                     |              |                        | 5-18y                                                             | Reading: Pseudoword Decoding                                    | MD= -5.37 [-27.41, 16.67]                          |
| 193 |                           |               |              |               |             | X            | X                      |            |            |                     |              |                        | 5-18y                                                             | Reading: Reading Comprehension                                  | MD= -7.96 [-12.15, -3.76]                          |
| 193 |                           |               |              |               |             | X            | X                      |            |            |                     |              |                        | 5-8y                                                              | Reading                                                         | MD= -7.38 [-9.69, -5.07]                           |
| 193 |                           |               |              |               |             | X            | X                      |            |            |                     |              |                        | 9-11y                                                             | Reading                                                         | MD= -8.93 [-14.42, -3.43]                          |
| 193 |                           |               |              |               |             | X            | X                      |            |            |                     |              |                        | 12-18y                                                            | Reading                                                         | MD= -3.35 [-6.70, 0.01]                            |
| 141 |                           |               |              |               |             | X            |                        |            |            |                     |              |                        | 4-11y                                                             | Reading                                                         | SMD= -0.67 [-0.87, -0.47]                          |
| 141 |                           |               |              |               |             | X            |                        |            |            |                     |              |                        | 11-18y                                                            | Reading                                                         | SMD= -0.51 [-0.67, -0.35]                          |
| 193 |                           |               |              |               |             | LT           |                        |            |            |                     |              |                        | 5-18y                                                             | Reading                                                         | MD= -8.07 [-14.29, -1.84]                          |
| 184 |                           |               |              |               |             | X            |                        |            |            |                     |              |                        | 6-18y                                                             | Reading (SD)                                                    | SMD= -0.44 (SE 0.10), p<0.001                      |
| 194 |                           |               | X            |               |             |              |                        |            |            |                     |              |                        | 6-10.11y                                                          | Decoding                                                        | Cohen's d Effect= -0.42 [-0.57, -0.27]             |
| 194 |                           |               | X            |               |             |              |                        |            |            |                     |              |                        | 6-10.11y                                                          | Decoding (excluding children with intellectual disabilities)    | Cohen's d Effect= -0.41 [-0.56, -0.24]             |
| 194 |                           |               | X            |               |             |              |                        |            |            |                     |              |                        | 6-10.11y                                                          | Decoding (excluding children with major disabilities)           | Cohen's d Effect= -0.43 [-0.54, -0.32]             |
| 190 |                           |               | X            | X             |             |              |                        |            |            |                     |              |                        | 2-12.2y                                                           | Expressive: Semantics                                           | Hedges' g= -0.38 [-0.48, -0.29]                    |
| 190 |                           |               | X            | X             |             |              |                        |            |            |                     |              |                        | 2-8.7y                                                            | Expressive: Semantics                                           | Hedges' g= -0.40 [-0.50, -0.31]                    |
| 190 |                           |               | X            | X             |             |              |                        |            |            |                     |              |                        | 5-17-12.2y                                                        | Receptive: Semantics                                            | Hedges' g= -0.59 [-0.79, -0.40]                    |
| 138 |                           |               | △            | X             |             |              |                        |            |            |                     |              |                        | 5-17.8y                                                           | Spelling                                                        | Cohen's d= -0.76 [-1.13, -0.40]                    |
| 141 |                           |               |              |               |             | X            |                        |            |            |                     |              |                        | 4-11y                                                             | Spelling                                                        | SMD= -0.56 [-0.74, -0.38]                          |
| 141 |                           |               |              |               |             | X            |                        |            |            |                     |              |                        | 11-18y                                                            | Spelling                                                        | SMD= -0.51 [-0.92, -0.09]                          |
| 184 |                           |               |              |               |             | X            |                        |            |            |                     |              |                        | 6-18y                                                             | Spelling (SD)                                                   | SMD= -0.52 (SE 0.06), p<0.001                      |
| 191 |                           |               | X            | X             |             |              |                        |            |            |                     |              |                        | 5-8y                                                              | Grammar                                                         | MD= -4.55 [-8.75, -0.34]                           |
|     |                           |               |              |               |             |              |                        |            |            |                     |              |                        |                                                                   |                                                                 | <b>Specific Learning Disorder: Mathematics</b>     |
| 193 | X                         |               |              |               |             |              |                        |            |            |                     |              |                        | 5-18y                                                             | Mathematics                                                     | MD= -11.92 [-14.60, -9.24]                         |
| 193 |                           |               | v            |               |             |              |                        |            |            |                     |              |                        | 5-18y                                                             | Mathematics                                                     | MD= -7.60 [-9.25, -5.96]                           |
| 138 |                           |               | △            | X             |             |              |                        |            |            |                     |              |                        | 5-20y                                                             | Mathematics                                                     | Cohen's d= -0.60 [-0.74, -0.46]                    |
| 193 |                           |               |              |               |             | X            | X                      |            |            |                     |              |                        | 5-18y                                                             | Mathematics: Aggregate Measure of Mathematics                   | MD= -12.90 [-23.38, -2.43]                         |
| 193 |                           |               |              |               |             | X            | X                      |            |            |                     |              |                        | 5-18y                                                             | Mathematics: Mathematical Knowledge                             | MD= -9.88 [-11.68, -8.08]                          |
| 193 |                           |               |              |               |             | X            | X                      |            |            |                     |              |                        | 5-18y                                                             | Mathematics: Calculation                                        | MD= -10.57 [-15.62, -5.52]                         |
| 193 |                           |               |              |               |             | X            | X                      |            |            |                     |              |                        | 5-18y                                                             | Mathematics: Mathematical Fluency                               | MD= -6.89 [-13.54, -0.23]                          |
| 193 |                           |               |              |               |             | X            | X                      |            |            |                     |              |                        | 5-18y                                                             | Mathematics: Applied Problems                                   | MD= -11.41 [-17.57, -5.26]                         |
| 193 |                           |               |              |               |             | X            | X                      |            |            |                     |              |                        | 5-8y                                                              | Mathematics                                                     | MD= -10.42 [-11.83, -9.01]                         |
| 193 |                           |               |              |               |             | X            | X                      |            |            |                     |              |                        | 9-11y                                                             | Mathematics                                                     | MD= -10.76 [-17.12, -4.41]                         |
| 193 |                           |               |              |               |             | X            | X                      |            |            |                     |              |                        | 12-18y                                                            | Mathematics                                                     | MD= -8.77 [-11.18, -6.37]                          |
| 141 |                           |               |              |               |             | X            |                        |            |            |                     |              |                        | 4-11y                                                             | Mathematics                                                     | SMD= -0.78 [-1.10, -0.46]                          |
| 141 |                           |               |              |               |             | X            |                        |            |            |                     |              |                        | 11-18y                                                            | Mathematics                                                     | SMD= -0.42 [-0.90, 0.06]                           |
| 184 |                           |               |              |               |             | X            |                        |            |            |                     |              |                        | 6-18y                                                             | Mathematics: Arithmetic (SD)                                    | SMD= -0.71 (SE 0.09), p<0.001                      |
| 193 |                           |               |              |               |             | LT           |                        |            |            |                     |              |                        | 5-18y                                                             | Mathematics                                                     | MD= -7.98 [-12.81, -3.16]                          |
| 173 |                           |               |              |               |             | ET           |                        |            |            |                     |              |                        | 5-10y                                                             | Mathematical Difficulties                                       | Risk Ratio= 1.13 [1.05, 1.22]                      |
|     |                           |               |              |               |             |              |                        |            |            |                     |              |                        |                                                                   |                                                                 | <b>Others neurological related outcomes</b>        |
| 195 |                           |               |              |               |             | X            |                        |            |            |                     |              |                        | 3-19y                                                             | Non-right Handedness                                            | OR= 2.12 [1.59, 2.78]                              |
|     |                           |               |              |               |             |              |                        |            |            |                     |              |                        |                                                                   |                                                                 | <b>Combinations of neurodevelopmental outcomes</b> |
| 176 |                           |               | X            | X             |             |              |                        |            |            |                     |              |                        | 5.1-6.1y                                                          | Neurological Dysfunction (Touwen)                               | RR= 4.55 [1.20, 17.17]                             |

**Supplementary material 4 a- Quality of systematic reviews with meta-analyses**

| Johanna Briggs critical appraisal scores for systematic reviews; additive score of meeting criteria (11 questions) |     |     |     |     |     |           |
|--------------------------------------------------------------------------------------------------------------------|-----|-----|-----|-----|-----|-----------|
| 5 (low)                                                                                                            | 6   | 7   | 8   | 9   | 10  | 11 (high) |
| 100                                                                                                                | 124 | 93  | 132 | 193 | 184 | 162       |
| 89                                                                                                                 | 191 | 63  | 97  | 113 | 120 | 86        |
|                                                                                                                    | 107 | 115 | 78  | 117 | 133 | 43        |
|                                                                                                                    | 112 | 167 | 161 | 88  | 145 | 140       |
|                                                                                                                    | 96  | 83  | 80  | 118 | 180 | 150       |
|                                                                                                                    | 148 | 185 | 119 | 114 | 51  | 116       |
|                                                                                                                    | 70  | 187 | 130 | 109 | 181 | 101       |
|                                                                                                                    | 174 | 155 | 128 | 177 | 141 | 188       |
|                                                                                                                    | 137 | 76  | 189 | 178 | 131 | 72        |
|                                                                                                                    | 90  | 98  | 138 | 105 | 159 | 182       |
|                                                                                                                    | 95  | 163 | 149 | 183 | 175 | 87        |
|                                                                                                                    | 127 | 135 | 160 | 108 | 56  | 54        |
|                                                                                                                    |     | 49  | 64  | 69  | 57  | 52        |
|                                                                                                                    |     | 71  | 153 | 62  | 58  | 154       |
|                                                                                                                    |     |     | 68  | 156 | 67  | 74        |
|                                                                                                                    |     |     | 111 | 134 | 166 | 121       |
|                                                                                                                    |     |     | 143 | 45  | 164 | 42        |
|                                                                                                                    |     |     | 186 | 104 | 91  | 102       |
|                                                                                                                    |     |     | 103 | 125 | 122 | 172       |
|                                                                                                                    |     |     | 139 | 142 | 192 |           |
|                                                                                                                    |     |     | 165 | 151 | 176 |           |
|                                                                                                                    |     |     | 82  | 106 | 94  |           |
|                                                                                                                    |     |     | 157 | 79  | 195 |           |
|                                                                                                                    |     |     | 81  | 190 | 53  |           |
|                                                                                                                    |     |     | 44  | 64  | 170 |           |
|                                                                                                                    |     |     | 147 | 173 | 59  |           |
|                                                                                                                    |     |     | 194 | 47  | 60  |           |
|                                                                                                                    |     |     | 146 | 152 | 110 |           |
|                                                                                                                    |     |     | 65  | 50  | 136 |           |
|                                                                                                                    |     |     | 55  |     | 61  |           |
|                                                                                                                    |     |     | 158 |     | 171 |           |
|                                                                                                                    |     |     | 129 |     | 168 |           |
|                                                                                                                    |     |     |     |     | 84  |           |

**Supplementary material 4 b** Publication bias assessed.

| Reference | Was the likelihood of publication bias assessed? |
|-----------|--------------------------------------------------|
| 42        | Yes                                              |
| 43        | Yes                                              |
| 44        | No                                               |
| 45        | Yes                                              |
| 45        | No                                               |
| 47        | Yes                                              |
| 49        | No                                               |
| 50        | No                                               |
| 51        | Yes                                              |
| 52        | Yes                                              |
| 53        | Yes                                              |
| 54        | Yes                                              |
| 55        | Yes                                              |
| 56        | Yes                                              |
| 57        | Yes                                              |
| 58        | No                                               |
| 59        | Yes                                              |
| 60        | Yes                                              |
| 61        | Yes                                              |
| 62        | No                                               |
| 63        | No                                               |
| 64        | Yes                                              |
| 65        | No                                               |
| 67        | Yes                                              |
| 68        | Yes                                              |
| 69        | No                                               |
| 70        | No                                               |
| 71        | No                                               |
| 72        | Yes                                              |
| 74        | Yes                                              |
| 76        | Yes                                              |
| 78        | Yes                                              |
| 79        | Yes                                              |
| 80        | Yes                                              |
| 81        | Yes                                              |
| 82        | No                                               |
| 83        | No                                               |

|     |     |
|-----|-----|
| 84  | Yes |
| 86  | Yes |
| 87  | Yes |
| 88  | Yes |
| 89  | No  |
| 90  | Yes |
| 91  | Yes |
| 93  | No  |
| 94  | Yes |
| 95  | Yes |
| 96  | No  |
| 97  | Yes |
| 98  | Yes |
| 100 | No  |
| 101 | Yes |
| 102 | Yes |
| 103 | Yes |
| 104 | Yes |
| 105 | No  |
| 106 | Yes |
| 107 | No  |
| 108 | Yes |
| 109 | Yes |
| 110 | Yes |
| 111 | Yes |
| 112 | No  |
| 113 | Yes |
| 114 | Yes |
| 115 | No  |
| 116 | Yes |
| 117 | Yes |
| 118 | Yes |
| 119 | Yes |
| 120 | Yes |
| 121 | Yes |
| 122 | Yes |
| 124 | Yes |
| 125 | Yes |
| 127 | No  |
| 128 | Yes |
| 129 | Yes |
| 130 | Yes |
| 131 | Yes |
| 132 | Yes |
| 133 | Yes |

|     |     |
|-----|-----|
| 134 | No  |
| 135 | No  |
| 136 | Yes |
| 137 | Yes |
| 138 | Yes |
| 139 | Yes |
| 140 | Yes |
| 141 | Yes |
| 142 | Yes |
| 143 | Yes |
| 146 | No  |
| 147 | No  |
| 148 | No  |
| 149 | Yes |
| 150 | Yes |
| 151 | Yes |
| 152 | Yes |
| 153 | Yes |
| 154 | Yes |
| 155 | No  |
| 156 | No  |
| 157 | Yes |
| 158 | No  |
| 159 | Yes |
| 160 | Yes |
| 161 | Yes |
| 162 | Yes |
| 163 | No  |
| 164 | Yes |
| 165 | Yes |
| 166 | Yes |
| 167 | Yes |
| 168 | Yes |
| 170 | No  |
| 171 | Yes |
| 172 | Yes |
| 173 | No  |
| 174 | No  |
| 175 | Yes |
| 176 | No  |
| 177 | Yes |
| 178 | No  |
| 179 | Yes |
| 180 | Yes |
| 181 | Yes |

|     |     |
|-----|-----|
| 182 | Yes |
| 183 | No  |
| 184 | Yes |
| 185 | No  |
| 186 | Yes |
| 187 | No  |
| 188 | Yes |
| 189 | Yes |
| 190 | Yes |
| 191 | No  |
| 192 | Yes |
| 193 | No  |
| 194 | Yes |
| 195 | Yes |

**Supplementary material 5** Figure 2- Countries in systematic reviews with metaanalyses covering different themes/subthemes.

**Maps legends**

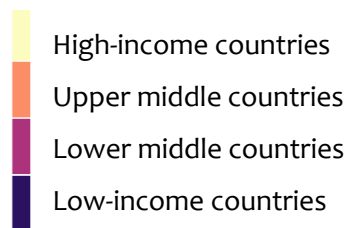

**Mortality and Hospitalization**

**Mortality**

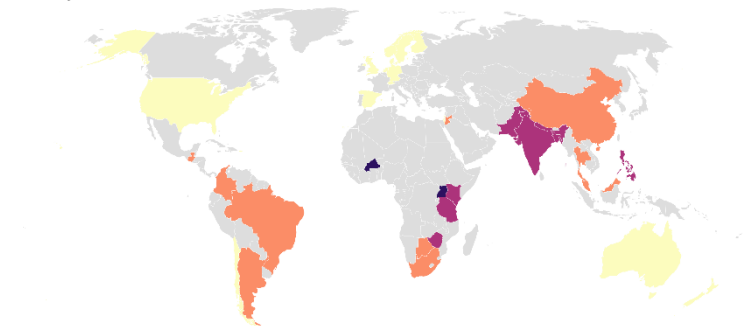

Created with Datawrapper

**Hospitalization**

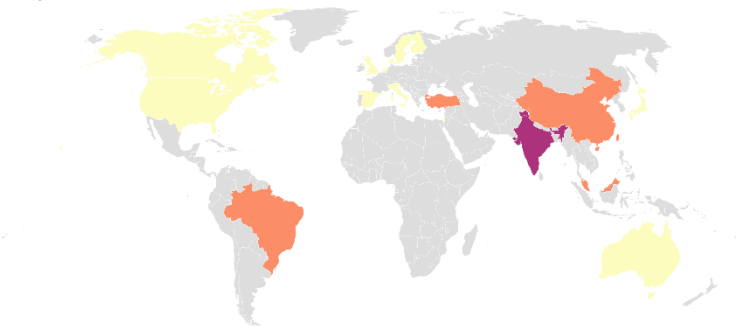

Created with Datawrapper

# Neonatal Early Childhood Health

Asphyxia

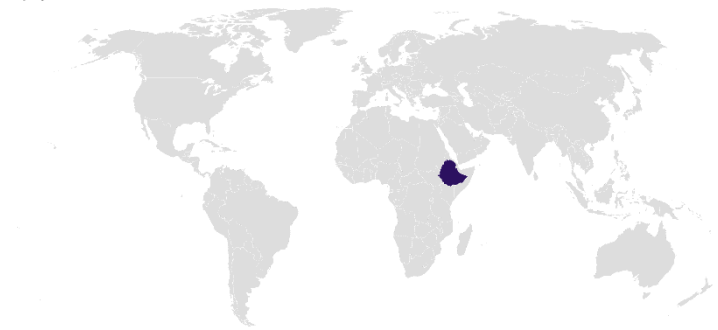

Created with Datawrapper

Retinopathy

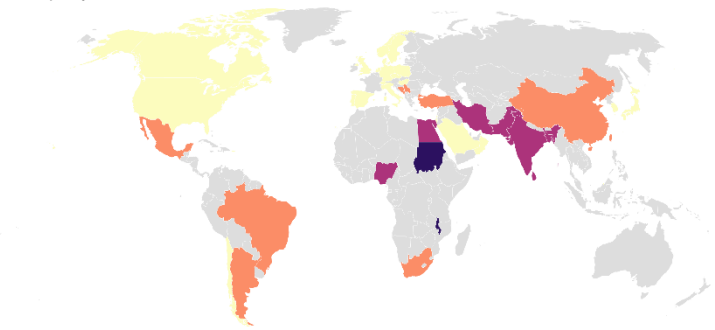

Created with Datawrapper

Caries/Oral Health

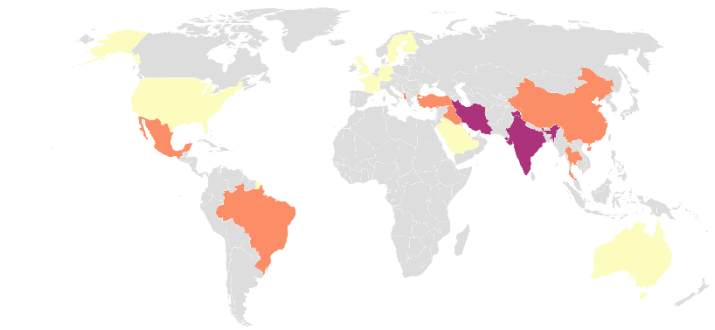

Created with Datawrapper

Infection/ Sepsis

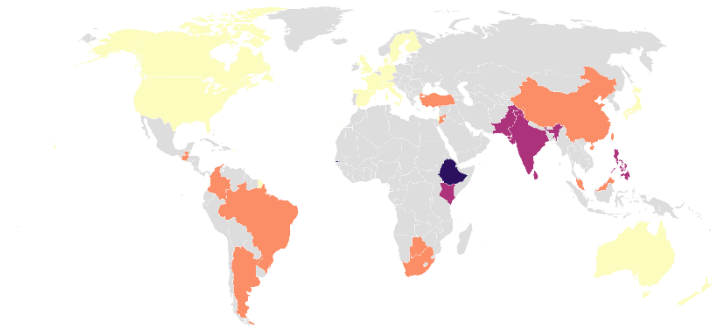

Created with Datawrapper

Epilepsy

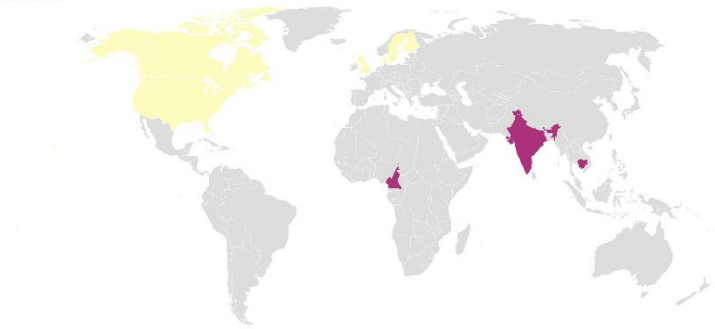

Created with Datawrapper

Quality of Life

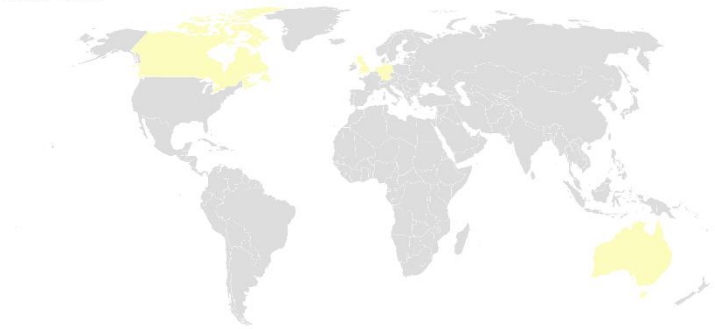

Created with Datawrapper



# Lung

Atopic Dermatitis

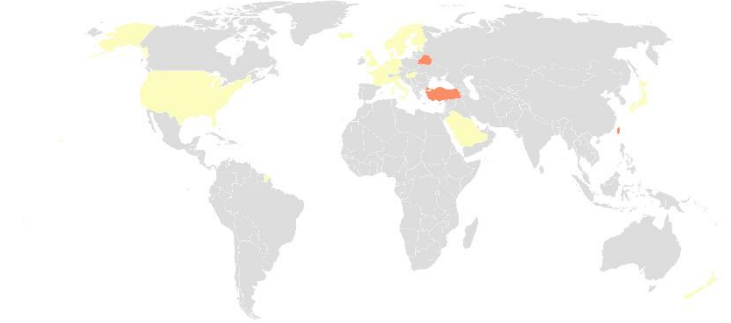

Created with Datawrapper

Other Allergies

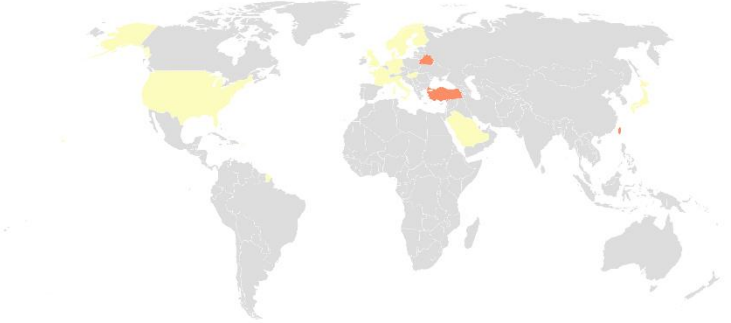

Created with Datawrapper

Lung Function

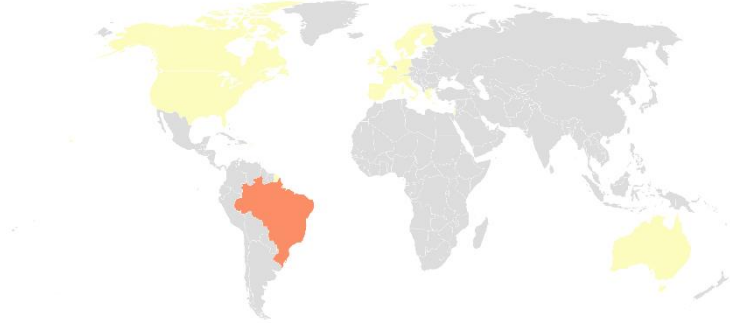

Created with Datawrapper

Lung Diseases (Asthma/Wheezing)

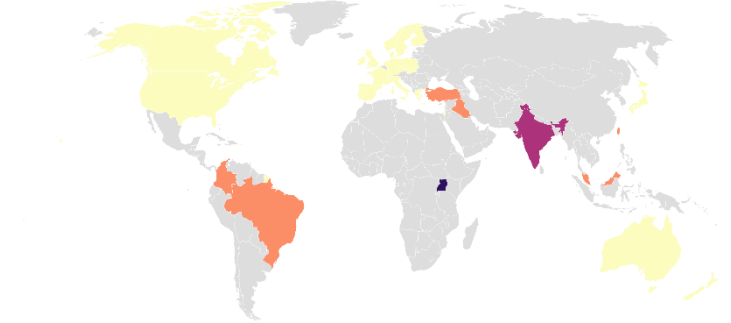

Created with Datawrapper

Other Lung Related Outcomes

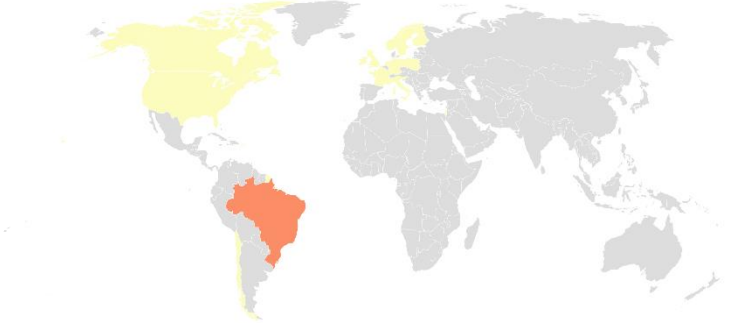

Created with Datawrapper

# Chronic Diseases

Hypertension

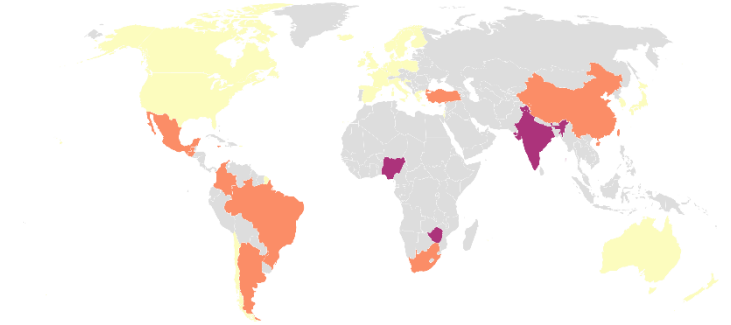

Created with Datawrapper

Kidney Related Diseases

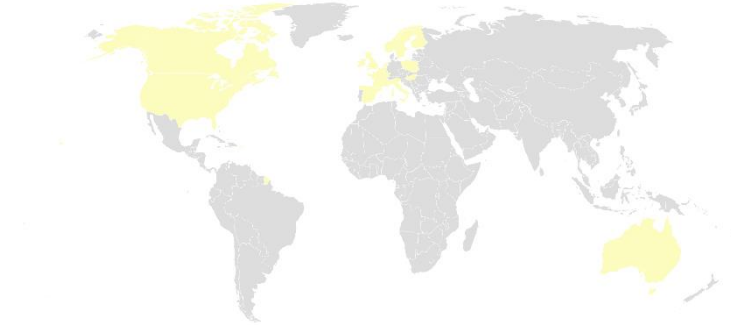

Created with Datawrapper

Diabetes Related Measurement

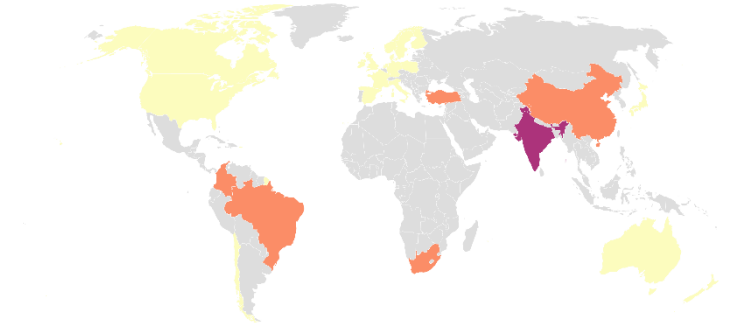

Created with Datawrapper

Hypercholesterolaemia

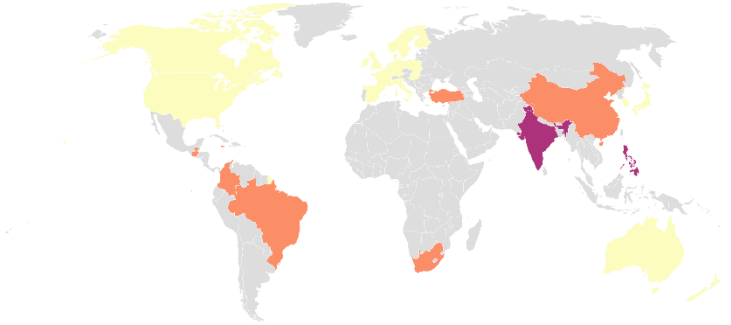

Created with Datawrapper

Type 1 Diabetes

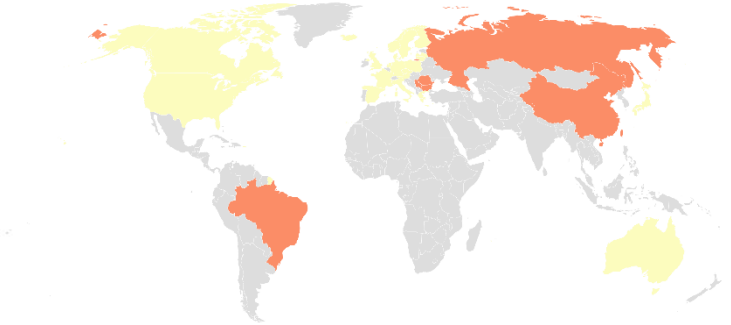

Created with Datawrapper

Paediatric CNS Tumours

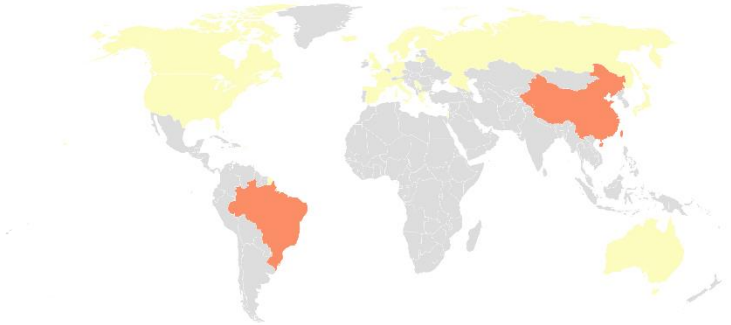

Created with Datawrapper

Coronary Heart Disease and Heart Function

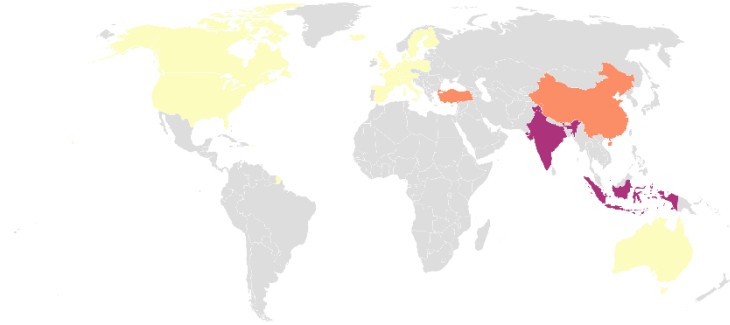

Created with Datawrapper

Type 2 Diabetes

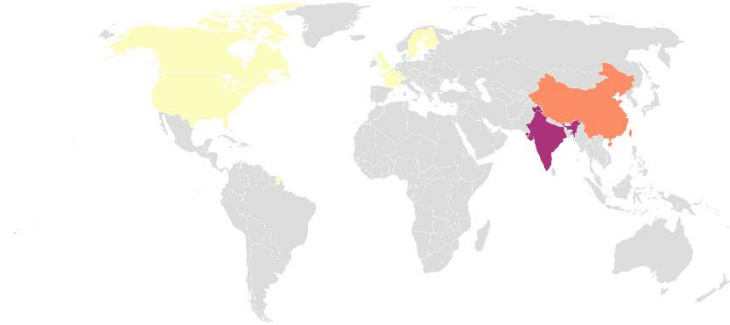

Created with Datawrapper

Leukaemia

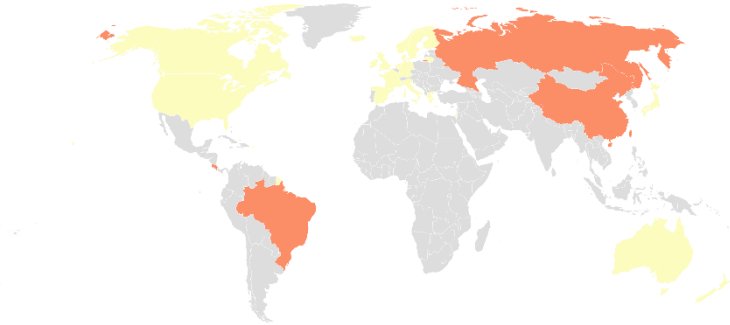

Created with Datawrapper

**Lymphoma**

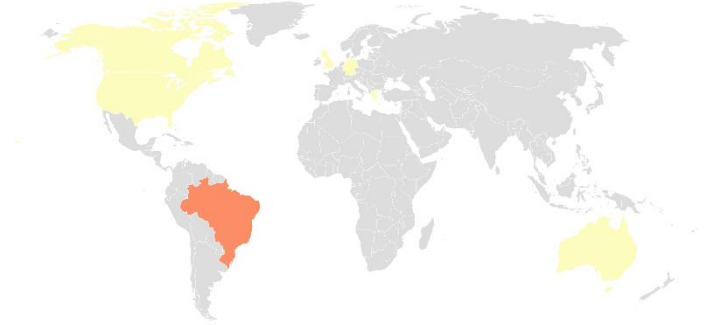

Created with Datawrapper

**Wilm's Tumour (Nephroblastoma)**

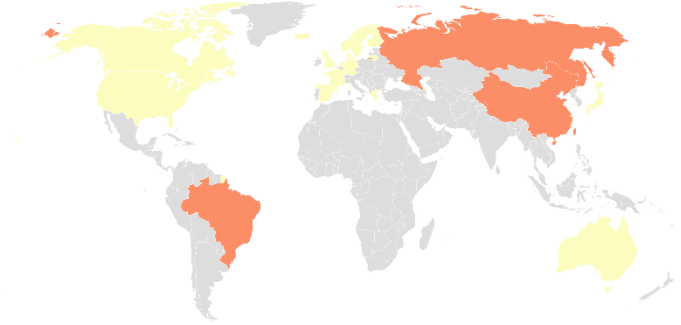

Created with Datawrapper

**Other Tumours**

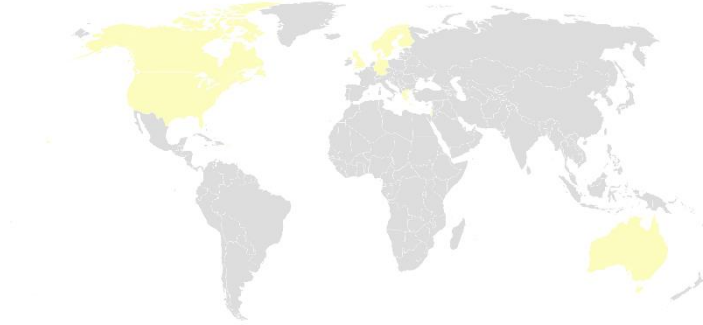

Created with Datawrapper

**Metabolic Syndrome**

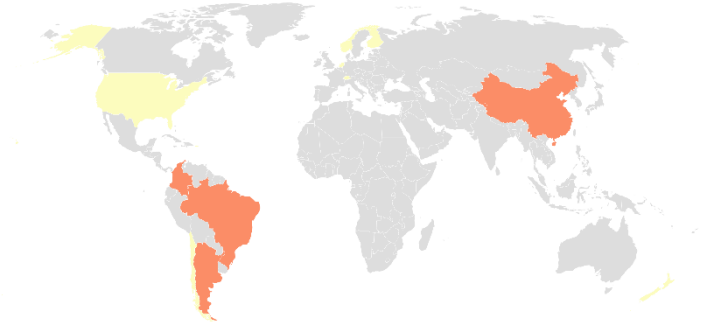

Created with Datawrapper

**Metabolic Biomarkers**

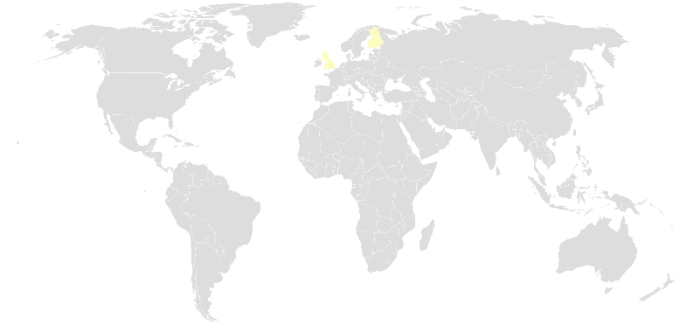

Created with Datawrapper

# Developmental

Brain Neurodevelopment

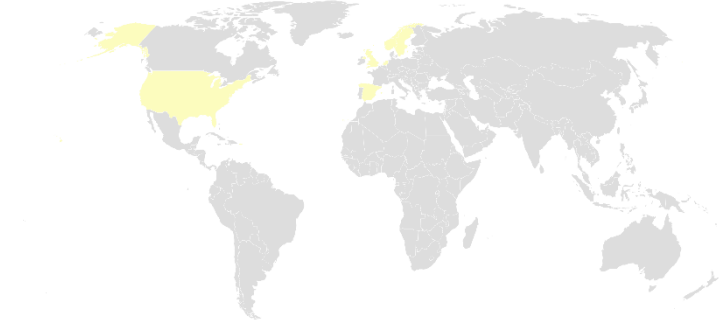

Created with Datawrapper

Visuomotor

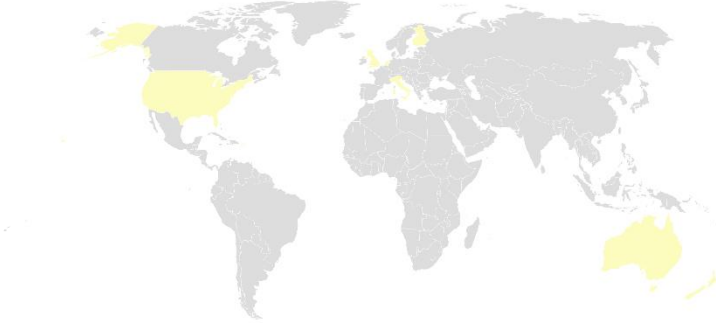

Created with Datawrapper

Cerebral Palsy

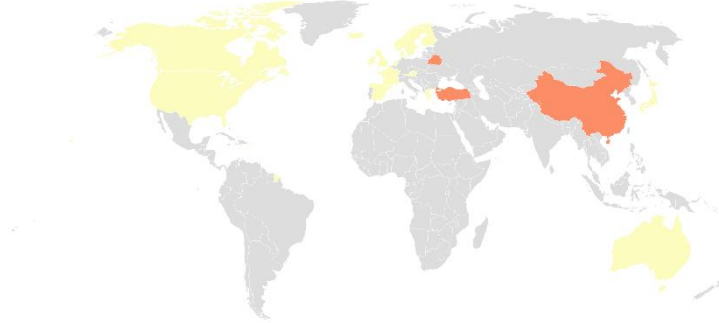

Created with Datawrapper

Physical Motor

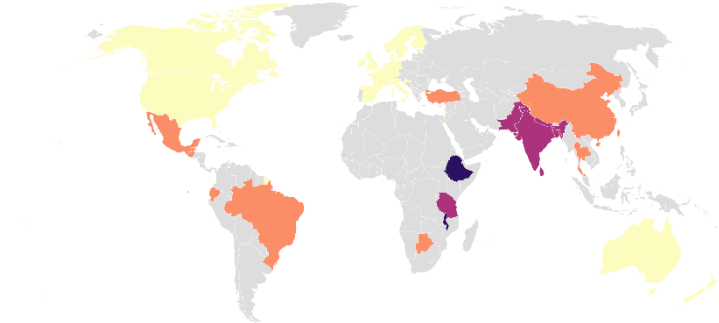

Created with Datawrapper

Intellectual Disabilities

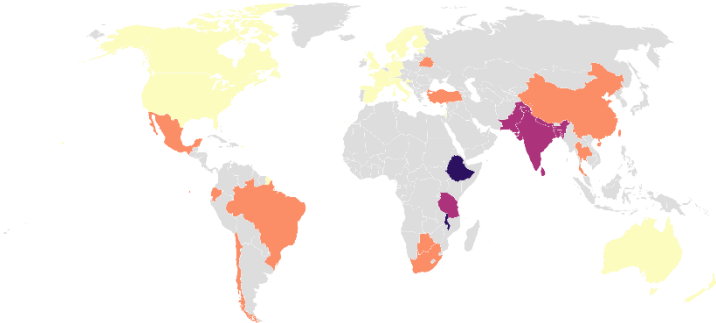

Created with Datawrapper

Memory

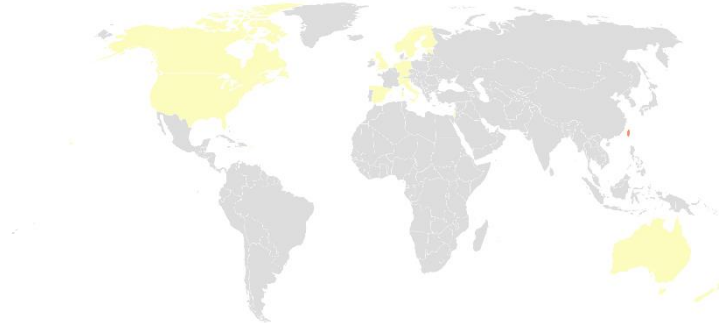

Created with Datawrapper

Intelligence Quotient (IQ)

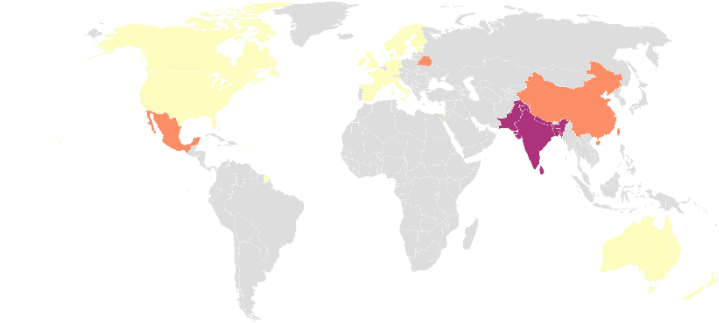

Created with Datawrapper

Communication

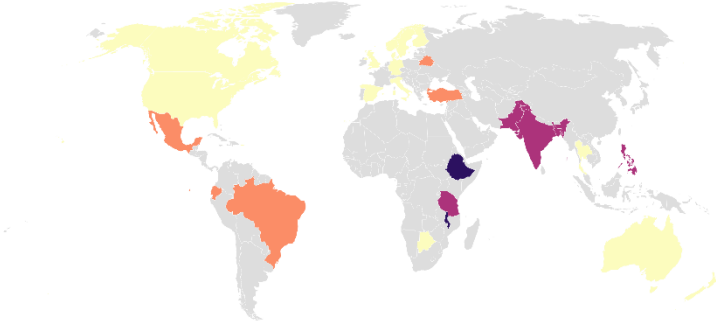

Created with Datawrapper

Specific Learning Disorder: Language

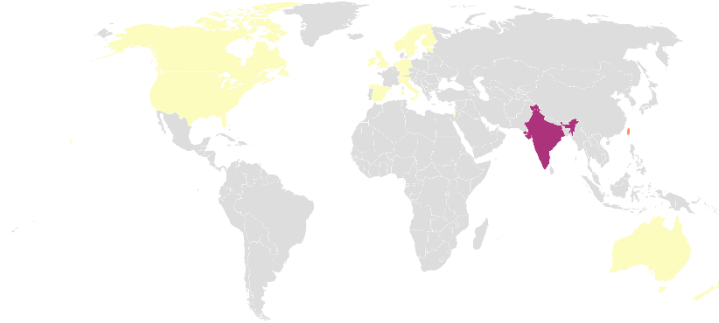

Created with Datawrapper

**Specific Learning Disorder: Mathematics**

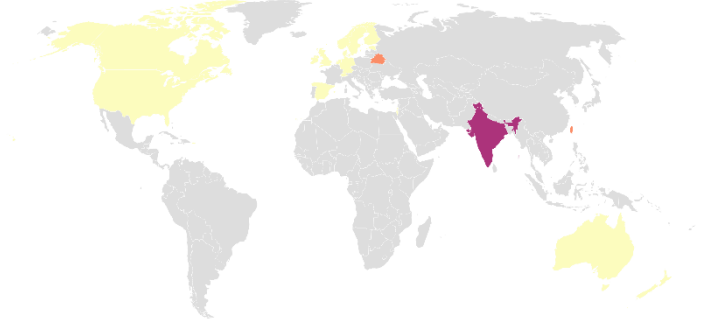

Created with Datawrapper

**Others Neurological Outcomes**

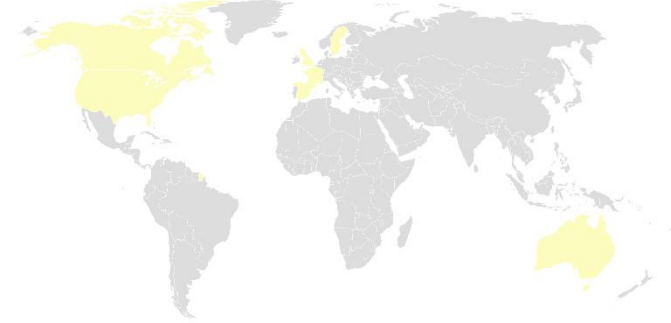

Created with Datawrapper

**Combinations of Neurodevelopmental Outcomes**

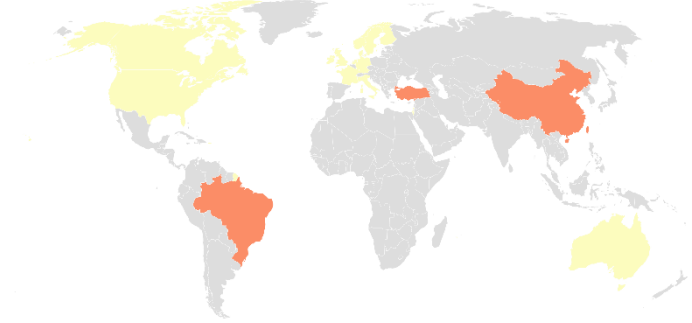

Created with Datawrapper

# Growth and Nutrition

Body Composition

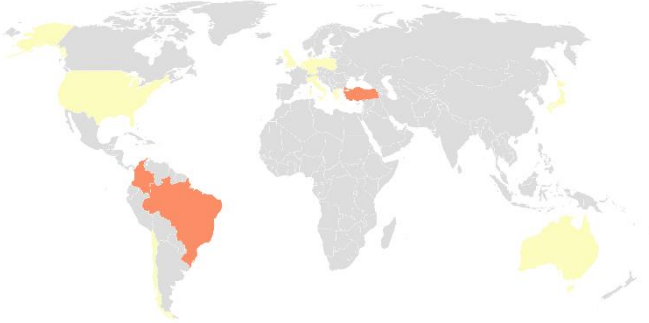

Created with Datawrapper

Bone Mineralization

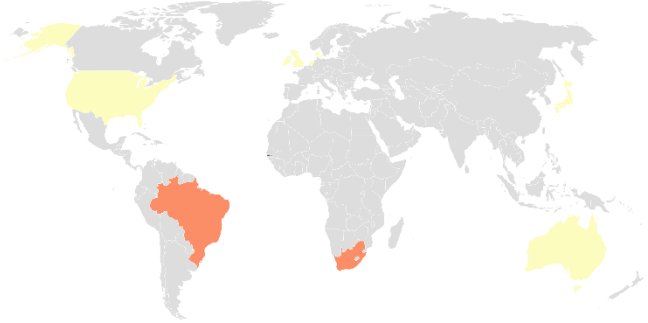

Created with Datawrapper

BMI

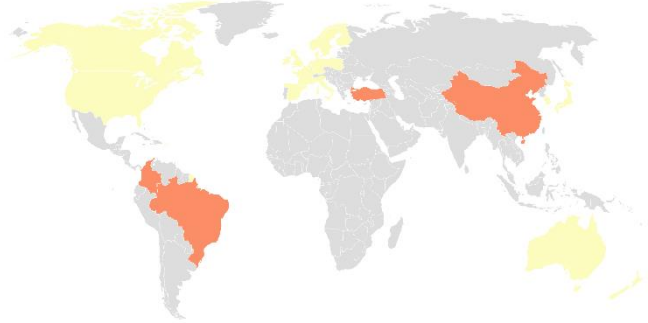

Created with Datawrapper

Undernutrition

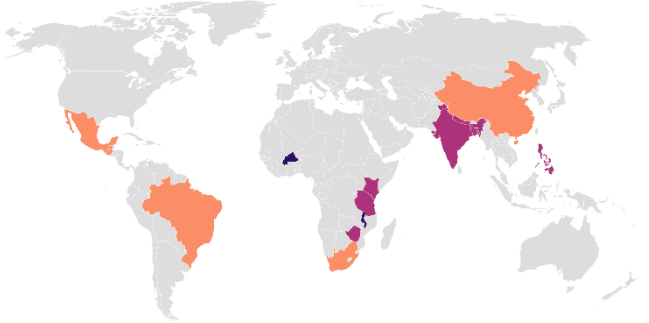

Created with Datawrapper

Overnutrition

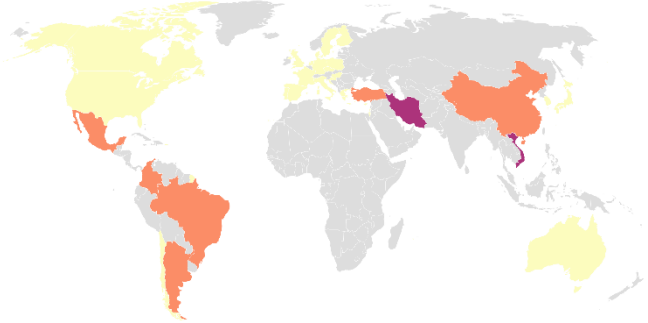

Created with Datawrapper

# Behavioural and Mental Health

Depressive/ Anxiety Disorders

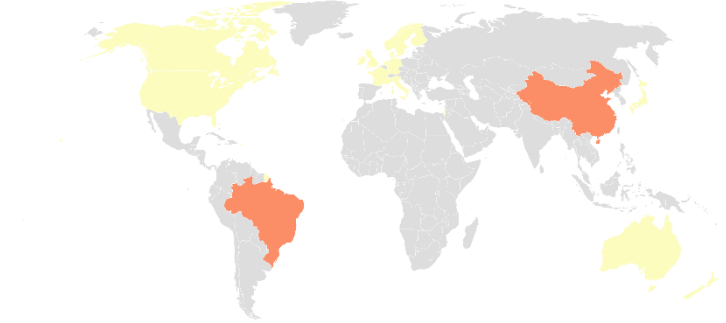

Created with Datawrapper

Other Psychological

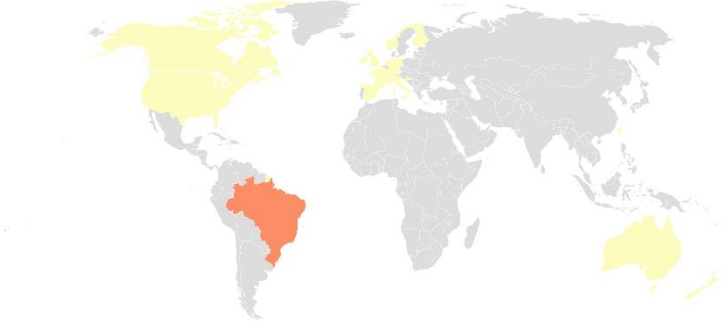

Created with Datawrapper

Behavioural

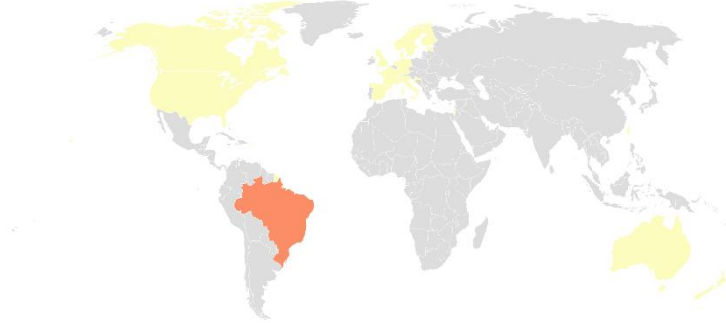

Created with Datawrapper

Physical Activity

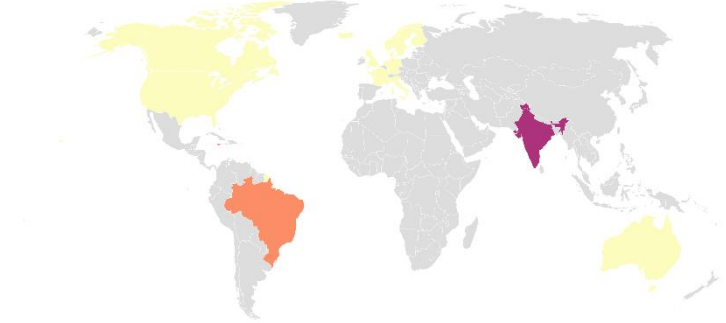

Created with Datawrapper

Attention

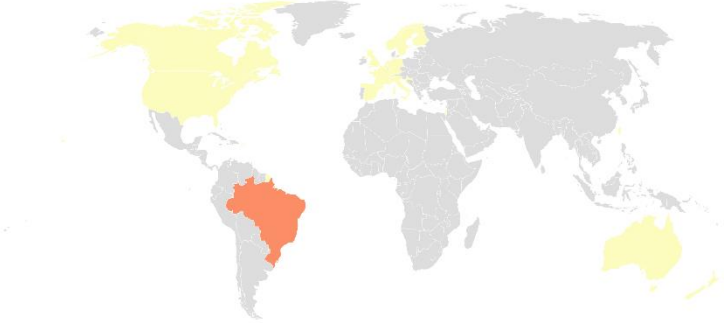

Created with Datawrapper

Attention-Deficit/Hyperactivity Disorder

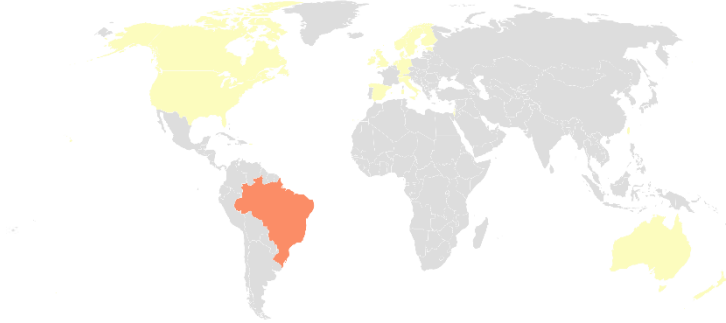

Created with Datawrapper

Autism Spectrum Disorder

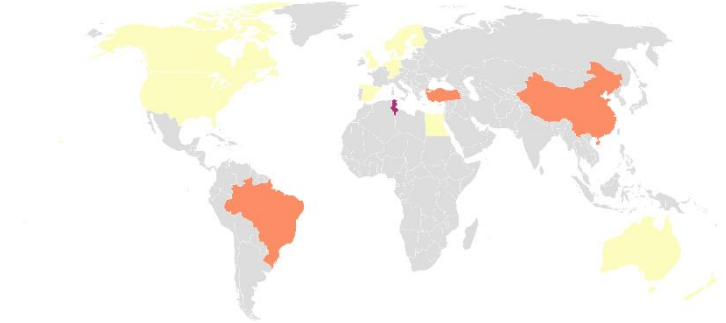

Created with Datawrapper

Suicidal Behaviour

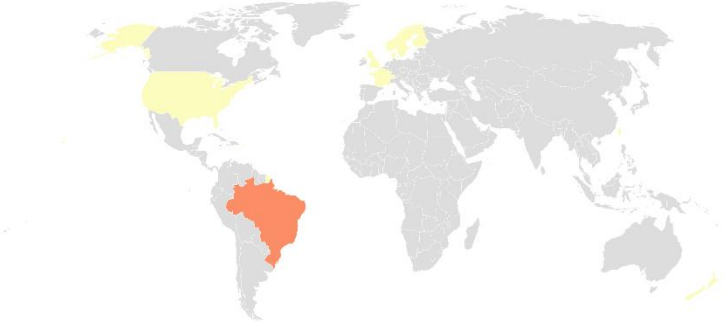

Created with Datawrapper

## Supplementary material 6—Additional data from two reviews with meta-analyses

Additional data from review number 99

|      |                                   |
|------|-----------------------------------|
| VLDL | Very low density lipoproteins     |
| LDL  | Low density lipoproteins          |
| HDL  | High-density lipoproteins         |
| IDL  | Intermediate density lipoproteins |

| Metabolic measure                        | Association with birth weight                     |
|------------------------------------------|---------------------------------------------------|
|                                          | Beta [95%CI] per 1-kg lower birth weight; P-value |
| <b>Lipoprotein subclass total lipids</b> |                                                   |
| Extremely large VLDL [mmol/L]*           | 0.120 [0.042– 0.198] P=0.0004                     |
| Very large VLDL [mmol/L]*                | 0.149 [0.0628– 0.235] P=0.0004                    |
| Large VLDL [mmol/L]*                     | 0.129 [0.0648– 0.193] P=1×10 <sup>-5</sup>        |
| Medium VLDL [mmol/L]*                    | 0.0546 [0.036– 0.0731] P=2×10 <sup>-9</sup>       |
| Small VLDL [mmol/L]                      | 0.0167 [0.0107– 0.0226] P=7×10 <sup>-9</sup>      |
| Very small VLDL [mmol/L]                 | 0.00725 [0.00342– 0.0111] P=8×10 <sup>-5</sup>    |
| LDL [mmol/L]                             | 0.0102 [0.00194– 0.0185] P=0.009                  |
| Large LDL [mmol/L]                       | 0.0149 [0.00439– 0.0254] P=0.003                  |
| Medium LDL [mmol/L]                      | 0.0108 [0.00429– 0.0173] P=0.0006                 |
| Small LDL [mmol/L]                       | 0.00787 [0.00366– 0.0121] P=8×10 <sup>-5</sup>    |
| Very large HDL [mmol/L]                  | -0.00905 [-0.015– -0.00315] P=0.002               |
| Large HDL [mmol/L]                       | -0.0177 [-0.0266– -0.00875] P=6×10 <sup>-5</sup>  |
| Medium HDL [mmol/L]                      | 0.00355 [-0.00222– 0.00932] P=0.12                |
| Small HDL [mmol/L]                       | 0.00956 [0.00514– 0.014] P=1×10 <sup>-5</sup>     |
| <b>Lipoprotein particle size</b>         |                                                   |
| VLDL particle size [nm]                  | 0.115 [0.0739– 0.156] P=2×10 <sup>-8</sup>        |
| LDL particle size [nm]                   | -0.00922 [-0.0144– -0.00408] P=0.0002             |
| HDL particle size [nm]                   | -0.016 [-0.0226– -0.00942] P=9×10 <sup>-7</sup>   |
| <b>Apolipoproteins</b>                   |                                                   |
| Apolipoprotein B [g/L]                   | 0.0128 [0.00675– 0.0188] P=2×10 <sup>-5</sup>     |
| Apolipoprotein A-I [g/L]                 | 0.00222 [-0.00393– 0.00838] P=0.31                |
| Apolipoprotein B/<br>apolipoprotein A-I  | 0.00721 [0.00325– 0.0112]<br>P=0.0004             |
| <b>Cholesterol</b>                       |                                                   |
| Total Cholesterol [mmol/L]               | 0.038 [0.00984– 0.0661] P=0.006                   |
| Non-HDL Cholesterol [mmol/L]             | 0.0461 [0.0206– 0.0716] P=0.0003                  |
| Remnant Cholesterol [mmol/L]             | 0.0222 [0.011– 0.0333] P=7×10 <sup>-5</sup>       |
| VLDL Cholesterol [mmol/L]                | 0.0164 [0.0094– 0.0234] P=3×10 <sup>-6</sup>      |
| IDL Cholesterol [mmol/L]                 | 0.0057 [0.000356– 0.0111] P=0.03                  |
| LDL Cholesterol [mmol/L]                 | 0.023 [0.00762– 0.0384] P=0.002                   |
| HDL Cholesterol [mmol/L]                 | -0.00803 [-0.0178–0.00171] P=0.10                 |
| Esterified Cholesterol [mmol/L]          | 0.0278 [0.00719– 0.0484] P=0.005                  |



|                                                         |                                                 |
|---------------------------------------------------------|-------------------------------------------------|
| Free Cholesterol [mmol/L]                               | 0.00783 [-0.000334– 0.016] P=0.06               |
| Esterification [%]                                      | 0.0935 [0.0373– 0.15] P=0.002                   |
| <b>Triglycerides</b>                                    |                                                 |
| Total Triglycerides [mmol/L]*                           | 0.0432 [0.0301– 0.0563] P=4×10 <sup>-11</sup>   |
| VLDL Triglycerides [mmol/L]*                            | 0.0601 [0.0418– 0.0784] P=1×10 <sup>-11</sup>   |
| IDL Triglycerides [mmol/L]                              | 0.0019 [0.000895– 0.00291] P=4×10 <sup>-5</sup> |
| LDL Triglycerides [mmol/L]                              | 0.00482 [0.00267– 0.00697] P=8×10 <sup>-7</sup> |
| HDL Triglycerides [mmol/L]                              | 0.000845 [-0.00033– 0.0020] P=0.17              |
| <b>Phospholipids</b>                                    |                                                 |
| Total Phospholipids [mmol/L]                            | 0.0151 [0.000414– 0.0298] P=0.04                |
| VLDL Phospholipids [mmol/L]                             | 0.0127 [0.00786– 0.0175] P=4×10 <sup>-8</sup>   |
| IDL Phospholipids [mmol/L]                              | 0.00218 [6.1e-06– 0.00436] P=0.02               |
| LDL Phospholipids [mmol/L]                              | 0.00539 [0.000773– 0.01] P=0.01                 |
| HDL Phospholipids [mmol/L]                              | -0.00676 [-0.0164– 0.00291] P=0.20              |
| Phosphoglycerides [mmol/L]                              | 0.0213 [0.00938– 0.0333] P=0.0003               |
| Cholines [mmol/L]                                       | 0.0235 [0.0119– 0.0351] P=0.0001                |
| Sphingomyelin [mmol/L]                                  | 0.0024 [-0.000185– 0.00498] P=0.05              |
| <b>Fatty acids</b>                                      |                                                 |
| Total Fatty Acids [mmol/L]                              | 0.197 [0.122– 0.272] P=5×10 <sup>-8</sup>       |
| Saturated Fatty Acids [mmol/L]                          | 0.082 [0.0521– 0.112] P=1×10 <sup>-8</sup>      |
| Monounsaturated Fatty Acids [mmol/L]                    | 0.062 [0.0356– 0.0884] P=5×10 <sup>-7</sup>     |
| Polyunsaturated Fatty Acids [mmol/L]                    | 0.0492 [0.0254– 0.0731] P=1×10 <sup>-5</sup>    |
| Omega-6 Fatty Acids [mmol/L]                            | 0.0422 [0.0208– 0.0637] P=4×10 <sup>-5</sup>    |
| Linoleic Acid [mmol/L]                                  | 0.0388 [0.0208– 0.0568] P=1×10 <sup>-5</sup>    |
| Omega-3 Fatty Acids [mmol/L]                            | 0.00665 [0.00302– 0.0103] P=0.0001              |
| Docosahexaenoic Acid [mmol/L]                           | 0.00185 [0.000217– 0.00349] P=0.01              |
| <b>Fatty acid ratios, relative to total fatty acids</b> |                                                 |
| Saturated Fatty Acids [%]                               | 0.11 [0.0456– 0.174] P=0.006                    |
| Monounsaturated Fatty Acids [%]                         | 0.104 [0.0103– 0.198] P=0.009                   |
| Polyunsaturated Fatty Acids [%]                         | -0.195 [-0.292– -0.0979] P=4×10 <sup>-5</sup>   |
| Omega-6 Fatty Acids [%]                                 | -0.187 [-0.279– -0.095] P=2×10 <sup>-5</sup>    |
| Linoleic Acid [%]                                       | -0.117 [-0.215– -0.0193] P=0.007                |
| Omega-3 Fatty Acids [%]                                 | -0.00389 [-0.029– 0.0212] P=0.83                |
| Docosahexaenoic Acid [%]                                | -0.00745 [-0.0194– 0.00449] P=0.29              |
| Unsaturation Degree                                     | -0.0031 [-0.0053– -0.000891] P=0.006            |
| <b>Amino acids</b>                                      |                                                 |
| Alanine [μmol/L]                                        | 5.26 [3.14– 7.38] P=1×10 <sup>-6</sup>          |
| Glutamine [μmol/L]                                      | -3.45 [-5.9– -0.993] P=0.003                    |
| Glycine [μmol/L]                                        | -3.48 [-5.57– -1.4] P=0.002                     |
| Histidine [μmol/L]                                      | 0.072 [-0.294– 0.438] P=0.88                    |
| Isoleucine [μmol/L]                                     | 1.18 [0.742– 1.62] P=7.1×10 <sup>-8</sup>       |
| Leucine [μmol/L]                                        | 1.05 [0.593– 1.52] P=7×10 <sup>-7</sup>         |
| Valine [μmol/L]                                         | 2.37 [1.2– 3.55] P=3×10 <sup>-5</sup>           |
| Phenylalanine [μmol/L]                                  | 0.435 [0.113– 0.757] P=0.0006                   |

|                                               |                                                   |
|-----------------------------------------------|---------------------------------------------------|
| Tyrosine [ $\mu\text{mol/L}$ ]                | 0.466 [0.092– 0.839] P=0.01                       |
| <b>Glycolysis and gluconeogenesis</b>         |                                                   |
| Glucose [mmol/L]*                             | 0.00367 [-0.000407– 0.00775] P=0.07               |
| Lactate [mmol/L]                              | 0.0225 [0.00971– 0.0352] P=0.0005                 |
| Pyruvate [ $\mu\text{mol/L}$ ]                | 2.12 [1.29– 2.95] P=5 $\times 10^{-6}$            |
| Glycerol [ $\mu\text{mol/L}$ ]                | 1.93 [0.828– 3.03] P=0.0002                       |
| <b>Ketone bodies</b>                          |                                                   |
| Acetoacetate [ $\mu\text{mol/L}$ ]*           | 0.0177 [-0.00279– 0.0381] P=0.10                  |
| Beta-hydroxybutyrate [ $\mu\text{mol/L}$ ]    | 0.129 [-1.16– 1.42] P=0.77                        |
| <b>Miscellaneous</b>                          |                                                   |
| Citrate [ $\mu\text{mol/L}$ ]                 | 0.157 [-0.509– 0.823] P=0.75                      |
| Acetate [ $\mu\text{mol/L}$ ]                 | 0.442 [0.0941– 0.789] P=0.02                      |
| Creatinine [ $\mu\text{mol/L}$ ]              | -0.194 [-0.519– 0.131] P=0.33                     |
| Albumin [cu]                                  | 0.219 [-0.0485– 0.487] P=0.52                     |
| <b>Inflammatory markers</b>                   |                                                   |
| Glycoprotein Acetyls [mmol/L]                 | 0.019 [0.0125– 0.0255] P=4 $\times 10^{-9}$       |
| C-Reactive Protein [mg/L]*                    | 0.0518 [0.00349– 0.1] P=0.04                      |
| <b>Liver function markers</b>                 |                                                   |
| Alanine Aminotransferase [cu]*                | 0.00282 [0.000213– 0.00542] P=0.12                |
| Gamma-glutamine Aminotransferase [cu]*        | 0.00548 [0.00282– 0.00814] P=4.6 $\times 10^{-5}$ |
| Aspartate Aminotransferase [cu]*              | 0.00461 [0.00153– 0.00768] P=0.003                |
| Bilirubin [cu]*                               | -0.00321 [-0.0070– 0.00055] P=0.10                |
| <b>Hormone related</b>                        |                                                   |
| Testosterone (Men) [nmol/L]                   | -0.28 [-0.643– 0.0843] P=0.13                     |
| Testosterone (Women) [nmol/L]                 | -0.00196 [-0.0571– 0.0531] P=0.98                 |
| Sex-hormone Binding Globulin (Men) [nmol/L]   | -1.3 [-2.06– -0.546] P=0.0007                     |
| Sex-hormone Binding Globulin (Women) [nmol/L] | -0.526 [-2.72– 1.67] P=0.63                       |
| Insulin [IU/L]*                               | 0.0426 [0.0282– 0.0569] P=5 $\times 10^{-9}$      |

Additional data from review number 101

|           |                                                                                            |
|-----------|--------------------------------------------------------------------------------------------|
| LV E/A    | Left ventricular Doppler early/late diastolic mitral inflow                                |
| LV E/e'   | Left ventricular early Doppler inflow velocity/ peak early diastolic tissue velocity ratio |
| LV strain | Left ventricular strain                                                                    |
| LVe'      | Left ventricular peak early diastolic tissue velocity                                      |
| LVEF      | Left ventricular ejection fraction                                                         |
| LVMI      | Left ventricular mass indexed to body surface area                                         |
| LVs'      | Left ventricular peak systolic tissue velocity                                             |
| LVSVI     | Left ventricular stroke volume indexed to body surface area                                |
| RV        | Right ventricular                                                                          |
| RVs'      | Right ventricular peak systolic tissue velocity                                            |
| TAPSE     | Tricuspid annular plane systolic excursion                                                 |

| Exposures       | Outcomes                 |                           |
|-----------------|--------------------------|---------------------------|
| <32 wk versus T | LV E/A                   | WMD= -0.20 [-0.31, -0.09] |
| <32 wk versus T | LV E/A                   | WMD= 0.00 [-0.06, 0.06]   |
| <32 wk versus T | LV E/A                   | WMD= 0.04 [-0.05, 0.13]   |
| <32 wk versus T | LV E/e'                  | WMD= 0.40 [0.19, 0.61]    |
| <32 wk versus T | LV E/e'                  | WMD= 1.73 [0.96, 2.50]    |
| <32 wk versus T | LV E/e'                  | WMD= 2.55 [1.82, 3.27]    |
| <32 wk versus T | LV E/e'                  | WMD= 0.57 [0.35, 0.79]    |
| <32 wk versus T | LV strain, %             | WMD= 0.06 [-2.27, 2.40]   |
| <32 wk versus T | LV strain, %             | WMD= 2.68 [0.10, 5.25]    |
| <32 wk versus T | LV strain, %             | WMD= 1.80 [1.08, 2.51]    |
| <32 wk versus T | LV strain, %             | WMD= -0.57 [-1.52, 0.37]  |
| <32 wk versus T | LVe', cm/s               | WMD= -1.12 [-1.54, -0.70] |
| <32 wk versus T | LVe', cm/s               | WMD= -1.93 [-2.46, -1.39] |
| <32 wk versus T | LVe', cm/s               | WMD= -1.48 [-2.63, -0.32] |
| <32 wk versus T | LVe', cm/s               | WMD= -1.28 [-1.82, -0.74] |
| <32 wk versus T | LVEF, %                  | WMD= 1.15 [0.35, 1.95]    |
| <32 wk versus T | LVEF, %                  | WMD= -2.48 [-5.78, 0.82]  |
| <32 wk versus T | LVEF, %                  | WMD= -1.97 [-4.38, 0.44]  |
| <32 wk versus T | LVEF, %                  | WMD= 1.67 [-0.48, 3.82]   |
| <32 wk versus T | LVMI, g/m <sup>2</sup>   | WMD= -2.71 [-4.74, -0.68] |
| <32 wk versus T | LVMI, g/m <sup>2</sup>   | WMD= 4.68 [-1.25, 10.61]  |
| <32 wk versus T | LVMI, g/m <sup>2</sup>   | WMD= -4.84 [-7.47, -2.21] |
| <32 wk versus T | LVs', cm/s               | WMD= -0.61 [-0.88, -0.34] |
| <32 wk versus T | LVs', cm/s               | WMD= -0.93 [-1.15, -0.71] |
| <32 wk versus T | LVs', cm/s               | WMD= -0.10 [-0.60, 0.40]  |
| <32 wk versus T | LVs', cm/s               | WMD= -0.73 [-1.05, -0.41] |
| <32 wk versus T | LVSVI, mL/m <sup>2</sup> | WMD= -0.80 [-4.83, 3.22]  |
| <32 wk versus T | RV strain, %             | WMD= 3.02 [2.23, 3.82]    |
| <32 wk versus T | RV strain, %             | WMD= 3.87 [1.54, 6.20]    |
| <32 wk versus T | RV strain, %             | WMD= 3.01 [0.81, 5.22]    |
| <32 wk versus T | RV strain, %             | WMD= 3.01 [0.81, 5.22]    |
| <32 wk versus T | RVs', cm/s               | WMD= -1.52 [-2.23, -0.80] |
| PT versus T     | LV E/A                   | WMD= -0.15 [-0.20, -0.10] |
| PT versus T     | LV E/A                   | WMD= 0.01 [-0.07, 0.05]   |

|             |                        |                           |
|-------------|------------------------|---------------------------|
| PT versus T | LV E/e'                | WMD= 0.36 [0.10, 0.61]    |
| PT versus T | LV E/e'                | WMD= 0.81 [-0.18, 1.81]   |
| PT versus T | LV E/e'                | WMD= 2.10 [0.98, 3.21]    |
| PT versus T | LV E/e'                | WMD= 0.57 [0.35, 0.79]    |
| PT versus T | LV strain, %           | WMD= 0.70 [-1.13, 2.54]   |
| PT versus T | LV strain, %           | WMD= 2.53 [0.08, 4.99]    |
| PT versus T | LV strain, %           | WMD= 1.55 [0.89, 2.21]    |
| PT versus T | LVe', cm/s             | WMD=-1.05 [-1.46, -0.65]  |
| PT versus T | LVe', cm/s             | WMD= -1.19 [-1.76, -0.62] |
| PT versus T | LVe', cm/s             | WMD= -0.87 [-1.50, -0.23] |
| PT versus T | LVEF, %                | WMD= 0.79 [0.02, 1.55]    |
| PT versus T | LVEF, %                | WMD= -2.89 [-5.18, -0.61] |
| PT versus T | LVEF, %                | WMD= -1.58 [-3.60, 0.44]  |
| PT versus T | LVMI, g/m <sup>2</sup> | WMD= -1.82 [-2.71, -0.92] |
| PT versus T | LVMI, g/m <sup>2</sup> | WMD=3.31 [0.45, 6.17]     |
| PT versus T | LVs', cm/s             | WMD=-0.34 [-0.83, 0.14]   |
| PT versus T | LVs', cm/s             | WMD=-0.81 [-1.13, -0.49]  |
| PT versus T | LVs', cm/s             | WMD=0.13 [-0.52, 0.78]    |
| PT versus T | RV strain, %           | WMD=3.02 [2.23, 3.82]     |
| PT versus T | RV strain, %           | WMD= 2.94 [0.54, 5.35]    |
| PT versus T | RV strain, %           | WMD=2.73 [0.89, 4.57]     |
| PT versus T | RVs', cm/s             | WMD= -0.96 [-1.30, -0.62] |

Additional secondary outcomes available in review 101 LV stroke volume index (LVSVI), LV fractional shortening (LVFS), MAPSE, LV end diastolic volume index (LVEDVI), LV posterior wall thickness at end-diastole (LVPWd), LV end-diastolic dimension (LVEDD), LV length, TAPSE, RVe', and LVEF by all methods

**Supplementary material 7- Prisma checklist 2020**

| Section and Topic       | Item # | Checklist item                                                                                                                                                                                                                                                                                       | Location where item is reported                                                             |
|-------------------------|--------|------------------------------------------------------------------------------------------------------------------------------------------------------------------------------------------------------------------------------------------------------------------------------------------------------|---------------------------------------------------------------------------------------------|
| <b>TITLE</b>            |        |                                                                                                                                                                                                                                                                                                      |                                                                                             |
| Title                   | 1      | Identify the report as a systematic review.                                                                                                                                                                                                                                                          | Title page                                                                                  |
| <b>ABSTRACT</b>         |        |                                                                                                                                                                                                                                                                                                      |                                                                                             |
| Abstract                | 2      | See the PRISMA 2020 for Abstracts checklist.                                                                                                                                                                                                                                                         |                                                                                             |
| <b>INTRODUCTION</b>     |        |                                                                                                                                                                                                                                                                                                      |                                                                                             |
| Rationale               | 3      | Describe the rationale for the review in the context of existing knowledge.                                                                                                                                                                                                                          | Background paragraph 3                                                                      |
| Objectives              | 4      | Provide an explicit statement of the objective(s) or question(s) the review addresses.                                                                                                                                                                                                               | Background paragraph 4                                                                      |
| <b>METHODS</b>          |        |                                                                                                                                                                                                                                                                                                      |                                                                                             |
| Eligibility criteria    | 5      | Specify the inclusion and exclusion criteria for the review and how studies were grouped for the syntheses.                                                                                                                                                                                          | Methods paragraph 4, 6, 7                                                                   |
| Information sources     | 6      | Specify all databases, registers, websites, organisations, reference lists and other sources searched or consulted to identify studies. Specify the date when each source was last searched or consulted.                                                                                            | Methods: paragraph 3                                                                        |
| Search strategy         | 7      | Present the full search strategies for all databases, registers and websites, including any filters and limits used.                                                                                                                                                                                 | Supplementary material 2                                                                    |
| Selection process       | 8      | Specify the methods used to decide whether a study met the inclusion criteria of the review, including how many reviewers screened each record and each report retrieved, whether they worked independently, and if applicable, details of automation tools used in the process.                     | Methods: paragraphs 4 and 7                                                                 |
| Data collection process | 9      | Specify the methods used to collect data from reports, including how many reviewers collected data from each report, whether they worked independently, any processes for obtaining or confirming data from study investigators, and if applicable, details of automation tools used in the process. | Methods: paragraph 5-7<br>No data were sought from investigators                            |
| Data items              | 10a    | List and define all outcomes for which data were sought. Specify whether all results that were compatible with each outcome domain in each study were sought (e.g., for all measures, time points, analyses), and if not, the methods used to decide which results to collect.                       | No outcomes were pre-specified. Figure 2 and Table 1 show the range of outcomes identified. |
|                         | 10b    | List and define all other variables for which data were sought (e.g., participant and intervention characteristics, funding sources). Describe any assumptions                                                                                                                                       | Methods: paragraph 5                                                                        |

| Section and Topic             | Item # | Checklist item                                                                                                                                                                                                                                                    | Location where item is reported                                                                           |
|-------------------------------|--------|-------------------------------------------------------------------------------------------------------------------------------------------------------------------------------------------------------------------------------------------------------------------|-----------------------------------------------------------------------------------------------------------|
|                               |        | made about any missing or unclear information.                                                                                                                                                                                                                    |                                                                                                           |
| Study risk of bias assessment | 11     | Specify the methods used to assess risk of bias in the included studies, including details of the tool(s) used, how many reviewers assessed each study and whether they worked independently, and if applicable, details of automation tools used in the process. | Methods: paragraph 6 describes quality assessment and c approach; results are in Supplementary material 3 |
| Effect measures               | 12     | Specify for each outcome the effect measure(s) (e.g., risk ratio, mean difference) used in the synthesis or presentation of results.                                                                                                                              | Tables 1 and 2                                                                                            |
| Synthesis methods             | 13a    | Describe the processes used to decide which studies were eligible for each synthesis (e.g., tabulating the study intervention characteristics and comparing against the planned groups for each synthesis (item #5)).                                             | Not applicable                                                                                            |
|                               | 13b    | Describe any methods required to prepare the data for presentation or synthesis, such as handling of missing summary statistics, or data conversions.                                                                                                             |                                                                                                           |
|                               | 13c    | Describe any methods used to tabulate or visually display results of individual studies and syntheses.                                                                                                                                                            |                                                                                                           |
|                               | 13d    | Describe any methods used to synthesize results and provide a rationale for the choice(s). If meta-analysis was performed, describe the model(s), method(s) to identify the presence and extent of statistical heterogeneity, and software package(s) used.       | Tables 1-3                                                                                                |
|                               | 13e    | Describe any methods used to explore possible causes of heterogeneity among study results (e.g., subgroup analysis, meta-regression).                                                                                                                             | None conducted                                                                                            |
|                               | 13f    | Describe any sensitivity analyses conducted to assess robustness of the synthesized results.                                                                                                                                                                      | None conducted                                                                                            |
| Reporting bias assessment     | 14     | Describe any methods used to assess risk of bias due to missing results in a synthesis (arising from reporting biases).                                                                                                                                           | None conducted                                                                                            |
| Certainty assessment          | 15     | Describe any methods used to assess certainty (or confidence) in the body of evidence for an outcome.                                                                                                                                                             | Narrative synthesis, use of colour coding                                                                 |
| <b>RESULTS</b>                |        |                                                                                                                                                                                                                                                                   |                                                                                                           |
| Study selection               | 16a    | Describe the results of the search and selection process, from the number of records identified in the search to the number of studies included in the review, ideally using a flow diagram.                                                                      | Figure 1                                                                                                  |
|                               | 16b    | Cite studies that might appear to meet the inclusion criteria, but which were excluded, and explain why they were excluded.                                                                                                                                       |                                                                                                           |
| Study                         | 17     | Cite each included study and present its characteristics.                                                                                                                                                                                                         | Tables 1 and 2                                                                                            |

| Section and Topic             | Item # | Checklist item                                                                                                                                                                                                                                                                        | Location where item is reported |
|-------------------------------|--------|---------------------------------------------------------------------------------------------------------------------------------------------------------------------------------------------------------------------------------------------------------------------------------------|---------------------------------|
| characteristics               |        |                                                                                                                                                                                                                                                                                       |                                 |
| Risk of bias in studies       | 18     | Present assessments of risk of bias for each included study.                                                                                                                                                                                                                          |                                 |
| Results of individual studies | 19     | For all outcomes, present, for each study: (a) summary statistics for each group (where appropriate) and (b) an effect estimate and its precision (e.g., confidence/credible interval), ideally using structured tables or plots.                                                     | Tables 1 and 2                  |
| Results of syntheses          | 20a    | For each synthesis, briefly summarise the characteristics and risk of bias among contributing studies.                                                                                                                                                                                |                                 |
|                               | 20b    | Present results of all statistical syntheses conducted. If meta-analysis was done, present for each the summary estimate and its precision (e.g., confidence/credible interval) and measures of statistical heterogeneity. If comparing groups, describe the direction of the effect. |                                 |
|                               | 20c    | Present results of all investigations of possible causes of heterogeneity among study results.                                                                                                                                                                                        | None conducted                  |
|                               | 20d    | Present results of all sensitivity analyses conducted to assess the robustness of the synthesized results.                                                                                                                                                                            | None conducted                  |
| Reporting biases              | 21     | Present assessments of risk of bias due to missing results (arising from reporting biases) for each synthesis assessed.                                                                                                                                                               | None conducted                  |
| Certainty of evidence         | 22     | Present assessments of certainty (or confidence) in the body of evidence for each outcome assessed.                                                                                                                                                                                   |                                 |
| <b>DISCUSSION</b>             |        |                                                                                                                                                                                                                                                                                       |                                 |
| Discussion                    | 23a    | Provide a general interpretation of the results in the context of other evidence.                                                                                                                                                                                                     | Discussion paragraphs 1-5       |
|                               | 23b    | Discuss any limitations of the evidence included in the review.                                                                                                                                                                                                                       | Discussion paragraph 6          |
|                               | 23c    | Discuss any limitations of the review processes used.                                                                                                                                                                                                                                 | Discussion paragraph 6          |
|                               | 23d    | Discuss implications of the results for practice, policy, and future research.                                                                                                                                                                                                        | Recommendations paragraph 1-4   |
| <b>OTHER INFORMATION</b>      |        |                                                                                                                                                                                                                                                                                       |                                 |
| Registration and protocol     | 24a    | Provide registration information for the review, including register name and registration number, or state that the review was not registered.                                                                                                                                        | PROSPERO CRD42021268843w        |
|                               | 24b    | Indicate where the review protocol can be accessed, or state that a protocol was not prepared.                                                                                                                                                                                        | LSHTM Data Compass              |
|                               | 24c    | Describe and explain any amendments to information provided at registration or in the protocol.                                                                                                                                                                                       |                                 |

| Section and Topic                              | Item # | Checklist item                                                                                                                                                                                                                             | Location where item is reported                                                                                                                                                                                                                                                                                                                                                            |
|------------------------------------------------|--------|--------------------------------------------------------------------------------------------------------------------------------------------------------------------------------------------------------------------------------------------|--------------------------------------------------------------------------------------------------------------------------------------------------------------------------------------------------------------------------------------------------------------------------------------------------------------------------------------------------------------------------------------------|
| Support                                        | 25     | Describe sources of financial or non-financial support for the review, and the role of the funders or sponsors in the review.                                                                                                              | This research was supported by the Nagasaki University “Doctoral Program for World-leading Innovative and Smart Education” for Global Health, KYOIKU KENKYU SHIEN KEIHI (“the Stipend”). Ministry of Education, Culture, Sports, Science and Technology (MEXT). The funder had no role in study design, data collection, data analysis, data interpretation, or writing of the manuscript. |
| Competing interests                            | 26     | Declare any competing interests of review authors.                                                                                                                                                                                         | No competing interests                                                                                                                                                                                                                                                                                                                                                                     |
| Availability of data, code and other materials | 27     | Report which of the following are publicly available and where they can be found: template data collection forms; data extracted from included studies; data used for all analyses; analytic code; any other materials used in the review. | All materials used are in Appendices and LSHTM Data Compass <a href="https://datacompass.lshtm.ac.uk/">https://datacompass.lshtm.ac.uk/</a>                                                                                                                                                                                                                                                |
